# Supplementary material for: Reporting of thermography parameters in biology: a systematic review of thermal imaging literature
Source: R Soc Open Sci. 2018 Dec 5;5(12):181281. doi: 10.1098/rsos.181281 (PMC6304129; doi:10.1098/rsos.181281)
Supplement: Supplementary material 2 [file rsos181281supp2.xlsx]

## Sheet: Primary papers
#	Authors	Year	Journal	volume	issue	page	URL	Thermography target	Biological field	Quantitative temperature values	Emissivity, ε, value given	ε value(s)	ε value measured or referenced	ε vlaue source URL	ε value where	Tref considered	Tref method	Tref where	Tenv considered	Tenv where	rh considered	rh where	d considered	d Where	Camera manufacturer	Camera model	Camera where
4	Costa et al	2007	ITALIAN JOURNAL OF ANIMAL SCIENCE	6	supp1	704	http://www.tandfonline.com/doi/pdf/10.4081/ijas.2007.1s.704	Pigs	Agricultural Animals	y	y	0.98	n	n/a	704	y	n/a	704	y	704-5	n	n/a	y	704	FLIR	Thermacam P25, FLIR	704
8	Autio et al	2007	JOURNAL OF APPLIED ANIMAL WELFARE SCIENCE	10	3	207	http://www.tandfonline.com/doi/pdf/10.1080/10888700701353493?needAccess=true	Horses	Agricultural Animals	y	y	0.95	n	n/a	211	n	n/a	n/a	y	210	y	210	y	210	FLIR	Thermacam PM595	211
11	Plotkin et al	2007	MICROSCOPY RESEARCH AND TECHNIQUE	70	1	69	http://onlinelibrary.wiley.com/doi/10.1002/jemt.20388/epdf	Hornet combs	insects	y	n	n/a	n/a	n/a	n/a	n	n/a	n/a	y	variable	y	72	y	72	FLIR	Thermovision A20	72
12	Allegre et al	2007	NEW PHYTOLOGIST	173	4	832	http://onlinelibrary.wiley.com/doi/10.1111/j.1469-8137.2006.01959.x/epdf	infected and not infected leaves	Plants	y	n	n/a	n/a	n/a	n/a	n	n/a	n/a	y	833	y	833	n	n/a	FLIR	Thermacam E2, FLIR	834
18	Falkenberd et al	2007	AGRICULTURAL WATER MANAGEMENT	87	1	23	http://www.hidro.ufcg.edu.br/twiki/pub/GeotecnologiaAplicada0/Per%EF%BF%BDodo20093/priscilla01.pdf	cotton plants	Plants	y	n	n/a	n/a	n/a	n/a	n	n/a	n/a	n	n/a	n	n/a	y	25	Indigo	LWIR, Indigo	25
22	Helfter et al	2007	TREE PHYSIOLOGY	27	2	169	https://watermark.silverchair.com/27-2-169.pdf?token=AQECAHi208BE49Ooan9kkhW_Ercy7Dm3ZL_9Cf3qfKAc485ysgAAAcMwggG_BgkqhkiG9w0BBwagggGwMIIBrAIBADCCAaUGCSqGSIb3DQEHATAeBglghkgBZQMEAS4wEQQMqSaYzT2oaf3KzURkAgEQgIIBdll6yN6ezbAfk_eL1rZugXRR0vT1kIKfKXywpTu2c52KP-n04BnF91FWwpLp5LVHtREgCtKKMn9K9wCYu4Ac2xYRN8clvZeYPF9AuttL4fgAHQKv0zYVfv5mwtZvcDUZlfyfEnZRy9Bkf5RSJuYbwX-H2a1m7d2zCYucXgPPTFw0JsakT-s-r9Of0llMX6…	Stems	Plants	y	n	n/a	n/a	n/a	n/a	n	n/a	n/a	n	n/a	n	n/a	n	n/a	Electrophysics	PV320E	172
23	Sugiura et al	2007	BIOSYSTEMS ENGINEERING	96	3	301	https://eprints.lib.hokudai.ac.jp/dspace/bitstream/2115/22084/1/BE96-3.pdf	soil water status	Earth and Soil	y	y	0.96-1	n	n/a	13	y	assumed to be ambient	7	y	10	y	10	y	10	n	n	n/a
24	Manley et al	2007	CANADIAN JOURNAL OF PHYSIOLOGY AND PHARMACOLOGY	85	3	382	http://www.nrcresearchpress.com/doi/pdf/10.1139/Y07-014	Pig cheast cavity	Agricultural Animals	y	n	n/a	n/a	n/a	n/a	n	n/a	n/a	n	n/a	n	n/a	n	n/a	FLIR	Thermacam SC 3000, FLIR	387
27	Grant et al	2007	JOURNAL OF EXPERIMENTAL BOTANY	58	4	815	https://academic.oup.com/jxb/article/58/4/815/426005	canopy vegetation	Plants	y	y	0.96	Jones 2004	http://www.sciencedirect.com/science/article/pii/S0065229604410039	817	y	tin foil-indistict from background?	817	y	817	n	n/a	y	817	Infrared solutions	IR snapshot 525	816
28	Moller et al	2007	JOURNAL OF EXPERIMENTAL BOTANY	58	4	827	https://academic.oup.com/jxb/article/58/4/827/424148	vine leaves	Plants	y	n	n/a	n/a	n/a	n/a	n	n/a	n/a	y	831	y	831	y	829	FLIR	Thermacam SC2000, FLIR	829
30	Stoll & Jones	2007	JOURNAL INTERNATIONAL DES SCIENCES DE LA VIGNE ET DU VIN	41	2	77	http://oeno-one.eu/article/view/851	vine leaves	Plants	y	y	0.95	n	n/a	78	y	tin foil-indistict from background?	78	y	78	y	81	y	79	Infrared solutions	IR snapshot 525	78
31	Lenthe et al	2007	PRECISION AGRICULTURE	8	1	15	https://link.springer.com/content/pdf/10.1007%2Fs11119-006-9025-6.pdf	Wheat	Plants	y	y	1	n	n/a	16	n	n/a	n	y	16	y	16	y	17	Jenoptik	Varioscan 3021 ST	16
32	Fuller et al	2007	EUROPEAN JOURNAL OF AGRONOMY	26	4	435	https://ac.els-cdn.com/S1161030107000081/1-s2.0-S1161030107000081-main.pdf?_tid=acfb5c50-b4b7-11e7-acb2-00000aacb35d&acdnat=1508408843_fa285dd01e582c5e335046bf7afac98f	Wheat	Plants	n	n	n/a	n	n/a	n/a	n	n/a	n/a	n	n/a	n	n/a	n	n/a	Inframetric	Inframetric 760	436
38	Hernandez-Eugenio et al	2007	AGROCIENCIA	41	5	503	http://www.redalyc.org/articulo.oa?id=30241502#	E. coli cultures	Other	y	y	0.85	n	n/a	506	n	n/a	n/a	y	506	n	n/a	y	506	Raytheon	D500	505
45	Ninomiya and yoshida	2007	VETERINARY OPHTHALMOLOGY	10	4	231	http://onlinelibrary.wiley.com/doi/10.1111/j.1463-5224.2007.00544.x/epdf	Dolphin eyes	Mammals	y	n	n/a	n/a	n/a	n/a	y	assumed to be ambient	242	y	242	n	n/a	n	n/a	NEC	TVS-700	232
48	Kotrba et al	2007	JOURNAL OF THERMAL BIOLOGY	32	6	355	https://ac.els-cdn.com/S0306456507000617/1-s2.0-S0306456507000617-main.pdf?_tid=89ead37c-b4c5-11e7-b45d-00000aacb35d&acdnat=1508414798_7ee00c3f32c8eb98a118cc9c0394415b	Cattle skin	Agricultural Animals	y	n	n/a	n/a	n/a	n/a	n	n/a	n/a	y	356	y	356	y	356	Agema	AGA 570	356
50	Ermakov et al	2007	MICROSCOPY RESEARCH AND TECHNIQUE	70	9	796	http://onlinelibrary.wiley.com/doi/10.1002/jemt.20469/epdf	Hornets	insects	y	y	0.97	Stabentheiner and Schmaranzer 1987,	https://static.uni-graz.at/fileadmin/_Persoenliche_Webseite/stabentheiner_anton/Dokumente/Publikationen/Stabentheiner_Schmaranzer_Thermology_2-1987-563_Thermographic_determination_of_body_temperatures_in_honey_bees_and_hornets__Calibration_and_applications.pdf	797	n	n/a	n/a	n	n/a	n	n/a	n	n/a	FLIR	Thermovision, A20	797
51	Leuzinger anf Kӧrner	2007	AGRICULTURAL AND FOREST METEOROLOGY	146	1	29	https://ac.els-cdn.com/S0168192307001396/1-s2.0-S0168192307001396-main.pdf?_tid=a1a7d77c-b4ce-11e7-85cc-00000aacb360&acdnat=1508418703_7e2225b710b5fcde1676ea584d79fbbe	Canopy vegetation	Plants	y	y	0.98	Rubio et al 1997	https://ac.els-cdn.com/S003442579600123X/1-s2.0-S003442579600123X-main.pdf?_tid=d1a68d78-ba56-11e7-89c2-00000aab0f6c&acdnat=1509026950_b64678d38afd4aab388313030e943c79	31	n	n/a	n/a	y	31	y	31	n	n/a	InfraTec	VarioCam, Infratec	31
52	Stabentheiner et al	2007	ETHOLOGY	113	10	995	https://www.ncbi.nlm.nih.gov/pmc/articles/PMC3227729/pdf/ukmss-33538.pdf	Bees and Wasps	insects	y	y	0.97	Stabentheiner and Schmaranzer 1987,	https://static.uni-graz.at/fileadmin/_Persoenliche_Webseite/stabentheiner_anton/Dokumente/Publikationen/Stabentheiner_Schmaranzer_Thermology_2-1987-563_Thermographic_determination_of_body_temperatures_in_honey_bees_and_hornets__Calibration_and_applications.pdf	3	n	n/a	n/a	y	3	n	n/a	n	n/a	FLIR	ThermaCam Sc2000	3
55	Ludwig et al	2007	WORLD RABBIT SCIENCE	15	4	199	saved	Rabbits	Mammals	y	y	0.97	Pajani 1989	not found	202	n	n/a	n/a	y	200	y	200	y	201	NEC	TVS 700	200
56	Steward et al	2007	PHYSIOLOGY & BEHAVIOR	92	3	520	https://ac.els-cdn.com/S0031938407001643/1-s2.0-S0031938407001643-main.pdf?_tid=b55c0906-b4d2-11e7-849f-00000aab0f26&acdnat=1508420453_83609041537272d116335e4bf98b4c01	cow eyes	Agricultural Animals	y	n	n/a	n/a	n/a	n/a	y	assumed to be ambient	522	y	522	y	522	y	522	FLIR	ThermaCam S60, FLIR	522
57	Sumbera et al	2007	PHYSIOLOGY & BEHAVIOR	92	3	526	https://ac.els-cdn.com/S0031938407001655/1-s2.0-S0031938407001655-main.pdf?_tid=88b02864-b4d3-11e7-94aa-00000aab0f26&acdnat=1508420808_02644af7774ca70cdfe2ebbb7fa65f0c	Mole rats	Mammals	y	n	n/a	n/a	n/a	n/a	y	thermometer	527	y	527	y	527	y	527	Agema	AGA 570	527
60	Kovac et al	2007	JOURNAL OF INSECT PHYSIOLOGY	53	12	1250	https://www.ncbi.nlm.nih.gov/pmc/articles/PMC3227735/pdf/ukmss-33537.pdf	Bees	insects	y	y	0.97	Stabentheiner and Schmaranzer 1987,	https://static.uni-graz.at/fileadmin/_Persoenliche_Webseite/stabentheiner_anton/Dokumente/Publikationen/Stabentheiner_Schmaranzer_Thermology_2-1987-563_Thermographic_determination_of_body_temperatures_in_honey_bees_and_hornets__Calibration_and_applications.pdf	3	n	n/a	n/a	y	2	y	2	y	2	Agema/Flir	AGA 782 SW or Thermcam SC200, FLIR	3
61	Schaefer et al	2007	RESEARCH IN VETERINARY SCIENCE	83	3	376	https://ac.els-cdn.com/S0034528807000100/1-s2.0-S0034528807000100-main.pdf?_tid=39253f24-b7de-11e7-8b07-00000aab0f6b&acdnat=1508755253_b33542003c76b9a2ba73f2125afe5153	Cow eye region	Agricultural Animals	y	n	n/a	n/a	n/a	n/a	n	n/a	n/a	n	n/a	n	n/a	y	378	FLIR	s60	378
62	Hacker & Neuner	2007	TREE PHYSIOLOGY	27	12	1661	https://oup.silverchair-cdn.com/oup/backfile/Content_public/Journal/treephys/27/12/10.1093/treephys/27.12.1661/2/27-12-1661.pdf?Expires=1508849188&Signature=NxdFZeho7CUwe8BI-ClZlTwkl2g0bcRStNHSCQa6cDM5IPdZu5zqafPB0CkcPoGy3CWfher0miQh857ECtNWwFkq8CETRt-KIDgpdjRRWJtWpwTCx12c1XxBeZPQut2R-jvQf35iie6emepqSOAbB-IuhbsW4xuHykZ9d~0QOTbwcR2uWHQHWqFnZ79vMGU1WUy63bCVJJomy725hRajYreKeb4CDuEolczVY4wzT8R-RPn7fu…	Leaves	Plants	y	n	n/a	n/a	n/a	n/a	n	n/a	n/a	y	1662	n	n/a	n	n/a	FLIR	s60	1662
68	Bartmaring et al	2008	ERGONOMICS	51	10	1606	http://www.tandfonline.com/doi/pdf/10.1080/00140130802216933?needAccess=true	Humans	Humans/Medical	y	n	n/a	n/a	n/a	n/a	n	n/a	n/a	y	1609	n	n/a	y	1610	Electrophysics	PV320t2	1609
71	Sullivan et al	2008	JOURNAL OF SOIL AND WATER CONSERVATION	63	1	28	https://pubag.nal.usda.gov/pubag/downloadPDF.xhtml?id=11955&content=PDF	Crop coverage	Plants	n	n	n/a	n/a	n/a	n/a	n	n/a	n/a	n	n/a	n	n/a	y	30	Fluke	Ti30	30
72	Manickavasagan et al	2008	JOURNAL OF STORED PRODUCTS RESEARCH	44	2	186	https://ac.els-cdn.com/S0022474X07001075/1-s2.0-S0022474X07001075-main.pdf?_tid=2144251c-b7e5-11e7-8b07-00000aab0f6b&acdnat=1508758219_15d32b29d0e4b1b5f8cf2e67140bb9d7	beetle larvea in wheat	insects	y	n	n/a	n/a	n/a	n/a	n	n/a	n/a	y	187	y	187	n	n/a	FLIR	ThermaCAM SC500, Flir	187
73	Horn et al	2008	JOURNAL OF WILDLIFE MANAGEMENT	72	1	123	http://www.jstor.org/stable/pdf/25097510.pdf?refreqid=excelsior%3Ad713dfa57a9445f63ee1497a53654691	bats	Mammals	n	n	n/a	n/a	n/a	n/a	n	n/a	n/a	n	n/a	n	n/a	y	fig 1.	FLIR	s60	124
74	Udevitz et al	2008	MARINE MAMMAL SCIENCE	24	1	57	https://www.fws.gov/Alaska/fisheries/mmm/walrus/pdf/2008_udevitz_mm_science.pdf	Walrus	Mammals	n	n	n/a	n/a	n/a	n/a	n	n/a	n/a	n	n/a	n	n/a	y	60	SenSyTech	Daedelus airborne multispectral scanner	60
82	Stoll et al	2008	VITIS	47	2	133	http://www.vitis-vea.de/admin/volltext/w1%2008%20901.pdf	grapevine leaves	Plants	y	n	n/a	n/a	n/a	n/a	n	n/a	n/a	y	133	n	n/a	y	133	NEC	TH7102 MX	133
83	Webster et al	2008	ANIMAL WELFARE	17	1	19	https://www.researchgate.net/profile/James_Webster3/publication/233654733_Assessment_of_welfare_from_physiological_and_behavioural_responses_of_New_Zealand_dairy_cows_exposed_to_cold_and_wet_conditions/links/54b5837d0cf26833efd32cb0.pdf	cows	Agricultural Animals	y	n	n/a	n/a	n/a	n/a	n	n/a	n/a	y	20	y	20	n	n/a	FLIR	inframetrics 760	20
85	Betke et al	2008	JOURNAL OF MAMMALOGY	89	1	18	http://www.bioone.org/doi/abs/10.1644/07-MAMM-A-011.1	bats	Mammals	n	n	n/a	n/a	n/a	n/a	n	n/a	n/a	n	n/a	n	n/a	n	n/a	Indigo	Merlin Med	19
87	Malcolm et al	2008	SCIENTIA HORTICULTURAE	115	3	285	https://www.sciencedirect.com/science/article/pii/S030442380700338X	Prunus roots	Plants	y	n	n/a	n/a	n/a	n/a	n	n/a	n/a	y	Fig. 3	n	n/a	n	n/a	FLIR	ThermaCam PM 575	286
91	Stewart et al	2008	PHYSIOLOGY & BEHAVIOR	93	4	789	https://ac.els-cdn.com/S0031938407004787/1-s2.0-S0031938407004787-main.pdf?_tid=1e099028-b7f7-11e7-98ed-00000aacb360&acdnat=1508765945_4e54b990fd56542104218bf8ceca2430	cow eyes	Agricultural Animals	y	y	0.94	n	n/a	Fig. 1	y	assumed to be ambient	791	y	791	y	791	y	791	FLIR	Thermacam S60, FLIR	791
92	Zaproudina et al	2008	PHYSIOLOGICAL MEASUREMENT	29	4	515	http://iopscience.iop.org/article/10.1088/0967-3334/29/4/007/pdf	Human skin	Humans/Medical	y	y	0.97	Togawa 1989	http://iopscience.iop.org/article/10.1088/0143-0815/10/1/004/pdf	518	n	n/a	n/a	y	517	n	n/a	y?	517	IRTIS	2000	517
94	Vogt et al	2008	JOURNAL OF INSECT SCIENCE	8		31	http://www.bioone.org/doi/full/10.1673/031.008.3101	fire ant mounds	insects	y	y	0.95	n	n/a	4	n	n/a	n/a	y	4	n	n/a	y	4	FLIR	thermacam es	3
95	Ondimu & Murase	2008	BIOSYSTEMS ENGINEERING	100	1	4	https://ac.els-cdn.com/S1537511008000561/1-s2.0-S1537511008000561-main.pdf?_tid=b089cf14-b7fa-11e7-9f2e-00000aacb35f&acdnat=1508767479_4354ceb312ac7693a09a840d119a5031	moss	Plants	y	y	0.93	measured	n/a	10	n	n/a	n/a	y	7	y	7	y	8	Horiba	ii-1064	7
97	Kalinowski et al	2008	PFERDEHEILKUNDE	24	3	313	saved	horses	Agricultural Animals	y	n	n/a	n/a	n/a	n/a	n	n/a	n/a	n	n/a	n	n/a	n	n/a	Infrared Diagnostic Systems	Hi-Res	315
104	Palmer and Siebke	2008	JOURNAL OF INSECT PHYSIOLOGY	54	7	1148	https://ac.els-cdn.com/S0022191008000899/1-s2.0-S0022191008000899-main.pdf?_tid=81e0cd52-b7ff-11e7-8712-00000aacb35d&acdnat=1508769548_dea52a0cc3aaf5aaab50a85a18238bf8	Insects	insects	y	n	n/a	n/a	n/a	n/a	n	n/a	n/a	y	1149	n	n/a	n	n/a	FLIR	Thermacam SC2000	1149
105	Mapalad et al	2008	JOURNAL OF EXPERIMENTAL BIOLOGY	211	14	2239	http://jeb.biologists.org/content/jexbio/211/14/2239.full.pdf	Bumblebees	insects	y	n	n/a	n/a	n/a	n/a	n	n/a	n/a	y	2239	n	n/a	n	n/a	Raytek	Phototemp Mx-6	2240
108	wright et al	2008	CLINICAL PHYSIOLOGY AND FUNCTIONAL IMAGING	28	5	299	http://onlinelibrary.wiley.com/doi/10.1111/j.1475-097X.2008.00807.x/epdf	human palms	Humans/Medical	y	n	n/a	n/a	n/a	n/a	n	n/a	n/a	n	n/a	n	n/a	n	n/a	FLIR	P60	301
110	Kana & Vass	2008	ENVIRONMENTAL AND EXPERIMENTAL BOTANY	64	1	90	https://ac.els-cdn.com/S0098847208000439/1-s2.0-S0098847208000439-main.pdf?_tid=2fd61a42-b806-11e7-8532-00000aab0f26&acdnat=1508772417_3f926d9d44abf98c0afbed301544a724	leaf and vasaline	Plants	y	y	0.95	Jones 2004	http://www.sciencedirect.com/science/article/pii/S0065229604410039	91	y	mirror	91	y	91	n	n/a	y	91	Jenoptik	Varioscan 3200 ST	91
113	Bulanon et al	2008	BIOSYSTEMS ENGINEERING	101	2	161	https://ac.els-cdn.com/S1537511008002420/1-s2.0-S1537511008002420-main.pdf?_tid=f97e98e6-b807-11e7-81c6-00000aacb361&acdnat=1508773185_f0cf2905d32c08532d10d3edd48b86e1	citrus canopy	Plants	y	y	0.9	measured	n/a	161	y	foil mirror	163	y	163	y	163	y	fig 4	FLIR	Thermacam P65HS FLIR	163
117	Stewart et al	2008	ANIMAL WELFARE	17	4	387	http://citeseerx.ist.psu.edu/viewdoc/download?doi=10.1.1.475.132&rep=rep1&type=pdf#page=60	cattle	Agricultural Animals	y	y	0.96	n	n/a	140	y	assumed to be ambient	53	y	388	y	388	y	388	FLIR	Thermacam S60	388
118	Colak et al	2008	JOURNAL OF DAIRY SCIENCE	91	11	4244	https://ac.els-cdn.com/S002203020870972X/1-s2.0-S002203020870972X-main.pdf?_tid=76976fa8-b80b-11e7-813a-00000aab0f6c&acdnat=1508774683_d2bc6a57dabb4b1fffc93405a30f5b0a	cattle	Agricultural Animals	y	n	n/a	n/a	n/a	n/a	n	n/a	n/a	y	4245	n	n/a	n	n/a	Infrared solutions	IR FlexCam S	4245
119	Hacker et al	2008	PLANT CELL AND ENVIRONMENT	31	11	1725	http://onlinelibrary.wiley.com/doi/10.1111/j.1365-3040.2008.01881.x/epdf	leaves	Plants	y	n	n/a	n/a	n/a	n/a	n	n/a	n/a	n	n/a	n	n/a	n	n/a	FLIR	ThermaCam S60	1726
120	Hovinen et al	2008	JOURNAL OF DAIRY SCIENCE	91	12	4592	http://www.journalofdairyscience.org/article/S0022-0302(08)70925-1/abstract	cows	Agricultural Animals	y	y	0.98	Jones and Plassmann 2002	http://ieeexplore.ieee.org/document/1175137/?part=1	4594	y	assumed to be ambient	4594	y	4594	n	n/a	y	4594	Infrared solutions	IR FlexCam S	4594
121	Zurek et al	2008	JOURNAL OF PHYSIOLOGY AND PHARMACOLOGY	59		819	https://scholar.google.com/scholar_lookup?author=G%20Zurek&atitle=INFLUENCE%20OF%20MECHANICAL%20HIPPOTHERAPY%20ON%20SKIN%20TEMPERATURE%20RESPONSES%20IN%20LOWER%20LIMBS%20IN%20CHILDREN%20WITH%20CEREBRAL%20PALSY&publication_year=2008&hl=en&journal=JOURNAL%20OF%20PHYSIOLOGY%20AND%20PHARMACOLOGY&volume=59&pages=819-824&issn=0867-5910&pmid=19218709	Human skin	Humans/Medical	y	n	n/a	n/a	n/a	n/a	n	n/a	n/a	n	n/a	n	n/a	n	n/a	Agema	Agema 550	820
122	Montanholi et al	2008	JOURNAL OF THERMAL BIOLOGY	33	8	468	http://uesc.br/cursos/pos_graduacao/mestrado/animal/bibliografia2012/soraia_artigo1_application.pdf	cows	Agricultural Animals	y	y	0.98	manufacturer	n/a	469	n	n/a	n/a	y	469	y	469	y	469	FLIR	Thermacam SC2000, FLIR	469
123	Stoll et al	2008	PRECISION AGRICULTURE	9	6	407	https://link.springer.com/content/pdf/10.1007%2Fs11119-008-9084-y.pdf	leaves vines	Plants	y	y	0.95	Idso et al 1969	http://www.jstor.org/stable/pdf/1933705.pdf?refreqid=excelsior:5f5655d9081a537e4d81ecafc23af10b	409	n	n/a	n/a	y	409	n	n/a	y	409	NEC	TH7102 MX	409
127	Kuhn & Meyer	2009	AQUATIC BIOLOGY	6	1	143	http://www.int-res.com/articles/ab2009/6/b006p143.pdf	Otters	Mammals	y	y	0.95	Porter & Gates 1969, Speakman & Ward 1998	http://www.jstor.org/stable/pdf/1948545.pdf?refreqid=excelsior%3Aff6df1fda3f8c1c7199f6aee4d24defa ; https://s3.amazonaws.com/academia.edu.documents/32020239/113.pdf?AWSAccessKeyId=AKIAIWOWYYGZ2Y53UL3A&Expires=1508841961&Signature=rkKPApY6yIcQdmS5wgkta21F974%3D&response-content-disposition=inline%3B%20filename%3DInfrared_thermography_principles_and_app.pdf ;	144	n	n/a	n/a	y	144	n	n/a	y	144	FLIR	Thermacam B20	144
128	Tillmann	2009	BEHAVIOUR	146		999	http://www.jstor.org/stable/pdf/40296110.pdf?refreqid=excelsior%3Ad9e428e962b459f27f11c5a23415ac0d	Partriges	Birds and Poultry	n	n	n/a	n/a	n/a	n/a	n	n/a	n/a	n	n/a	n	n/a	n	n/a	Raytheon	Palm IR-250 D	1003
133	Ichihashi et al	2009	EXPERIMENTAL ANIMALS	58	1	67	https://www.jstage.jst.go.jp/article/expanim/58/1/58_1_67/_pdf	rat skin	Mammals	y	n	n/a	n/a	n/a	n/a	n	n/a	n/a	y	68	y	68	n	n/a	NEC	Handy thermography TH6200	69
137	Sirault et al	2009	FUNCTIONAL PLANT BIOLOGY	36	10	970	https://scholar.google.com/scholar_lookup?author=X%20Sirault&atitle=A%20new%20screening%20method%20for%20osmotic%20component%20of%20salinity%20tolerance%20in%20cereals%20using%20infrared%20thermography&publication_year=2009&hl=en&journal=FUNCTIONAL%20PLANT%20BIOLOGY&volume=36&issue=10-11&pages=970-977&issn=1445-4408&doi=10.1071/FP09182	crop plants	Plants	y	y	0.95	Tanner 1963	https://dl.sciencesocieties.org/publications/aj/abstracts/55/2/AJ0550020210	971	n	n/a	n/a	y	971	y	971	y	971	FLIR	Thermacam SC660	971
139	Hiers et al	2009	INTERNATIONAL JOURNAL OF WILDLAND FIRE	18	3	315	https://www.srs.fs.usda.gov/pubs/ja/2009/ja_2009_hiers_001.pdf	forests and fires	Plants	y	y	0.96	n	n/a	318	n	n/a	n/a	y	318	y	318	y	318	FLIR	S60	317
141	Tillman	2009	JOURNAL OF ETHOLOGY	27	1	177	https://link.springer.com/content/pdf/10.1007%2Fs10164-008-0094-z.pdf	partige	Birds and Poultry	n	n	n/a	n/a	n/a	n/a	n	n/a	n/a	n	n/a	n	n/a	y	119	Raytheon/FLIR	Palm IR-250 D, FLIR P25	119
146	Fuentes et al	2009	VII INTERNATIONAL WORKSHOP ON SAP FLOW	846		167	https://www.researchgate.net/publication/256186700_Nocturnal_heat-pulse_sap_flow_as_a_sensitive_system_to_assess_drought_effects_on_grapevines_An_irrigation_scheduling_application	grapevine	Plants	y	n	n/a	n/a	n/a	n/a	n	n/a	n/a	n	n/a	n	n/a	n	n/a	FLIR	Thermacam PM575, FLIr	169
156	Shinder et al	2009	POULTRY SCIENCE	88	3	636	https://academic.oup.com/ps/article/88/3/636/2962783	eggs	Birds and Poultry	y	n	n/a	n/a	n/a	n/a	n	n/a	n/a	y	638	y	638	n	n/a	FLIR	PM545	638
158	Marks et al	2009	AMERICAN JOURNAL OF PHYSIOLOGY-REGULATORY INTEGRATIVE AND COMPARATIVE PHYSIOLOGY	296	4	R1239	https://www.physiology.org/doi/abs/10.1152/ajpregu.90723.2008	rats	Mammals	y	y	0.98	Vianna & Carrive 2005	file:///C:/Users/mh14884/Chrome%20Local%20Downloads/Vianna2005acceptedmanuscript.pdf	R1240	n	n/a	n/a	n	n/a	n	n/a	y	R1240	FLIR	Thermacam P45	R1240
160	Stewart et al	2009	JOURNAL OF DAIRY SCIENCE	92	4	1512	https://ac.els-cdn.com/S002203020970462X/1-s2.0-S002203020970462X-main.pdf?_tid=763bbdc6-b8af-11e7-b82e-00000aab0f6c&acdnat=1508845120_f05824bf88fd17add85bf6b354ef6af9	cows eyes	Agricultural Animals	y	n	n/a	n/a	n/a	n/a	y	assumed to be ambient	1514	y	1514	y	1514	y	1514	FLIR	Thermacam S60, FLIR	1514
161	Bouzida et al	2009	JOURNAL OF THERMAL BIOLOGY	34	3	120	https://ac.els-cdn.com/S0306456508001228/1-s2.0-S0306456508001228-main.pdf?_tid=e8db1b60-b8af-11e7-bc5e-00000aacb362&acdnat=1508845312_938e2cbc8258a112d4e55d33b1cc6112	humans	Humans/Medical	y	y	0.97-0.98	Steketee 1973	http://iopscience.iop.org/article/10.1088/0031-9155/18/5/307/pdf	126	n	n/a	n/a	y	122	n	n/a	n	n/a	FLIR	Phoenix model'	121
162	Nhan & Chau	2009	PHYSIOLOGICAL MEASUREMENT	30	4	N23	http://iopscience.iop.org/article/10.1088/0967-3334/30/4/N01/pdf	humans	Humans/Medical	y	y	0.97-0.99	Steketee 1974	http://iopscience.iop.org/article/10.1088/0031-9155/18/5/307/pdf	N25	y	assumed to be ambient	N25	y	N25	y	N25	y	N25	FLIR	Thermacam SC640	N24
163	Bollen et al	2009	AMERICAN JOURNAL OF PHYSIOLOGY-REGULATORY INTEGRATIVE AND COMPARATIVE PHYSIOLOGY	296	5	R1503	https://www.physiology.org/doi/abs/10.1152/ajpregu.90582.2008	mice	Mammals	y	n	n/a	Sokoloff et al 2002	https://pdfs.semanticscholar.org/7434/8223baaf66d7e002cbfb41aba1d4fb09a856.pdf	R1505	n	n/a	n/a	y	R1505	n	n/a	n	n/a	FLIR	Thermavision A20, FLIR	R1505
164	Bulanon et al	2009	BIOSYSTEMS ENGINEERING	103	1	12	https://ac.els-cdn.com/S1537511009000610/1-s2.0-S1537511009000610-main.pdf?_tid=1b871b6a-b976-11e7-90e9-00000aab0f27&acdnat=1508930438_ea8e6c41327ab7fc228728d9e4d4e0b6	Fruit	Plants	y	y	0.9	Bulanon et al 2008	https://ac.els-cdn.com/S1537511008002420/1-s2.0-S1537511008002420-main.pdf?_tid=f97e98e6-b807-11e7-81c6-00000aacb361&acdnat=1508773185_f0cf2905d32c08532d10d3edd48b86e1	17	y	not said	17	y	17	y	17	y	17	FLIR	ThermaCAM P65HS, FLIR	16
165	Kalincik et al	2009	JOURNAL OF APPLIED PHYSIOLOGY	106	6	1975	https://www.physiology.org/doi/abs/10.1152/japplphysiol.00095.2009	rats	Mammals	y	y	0.98	n	n/a	1977	n	n/a	n/a	y	1977	n	n/a	y	1977	FLIR	Thermacam p45, FLIR	1977
167	Dunbar et al	2009	JOURNAL OF ZOO AND WILDLIFE MEDICINE	40	2	296	http://www.jstor.org/stable/pdf/27751689.pdf?refreqid=excelsior%3Ab3e62361f66d8083e2b4959e590ba3b0	deer	Mammals	y	y	0.95	n	n/a	297	n	n/a	n/a	y	297	n	n/a	y	297	FLIR	Thermacam EX320, FLIR	297
169	Rainwater-Lovett et al	2009	VETERINARY JOURNAL	180	3	317	https://pubag.nal.usda.gov/pubag/downloadPDF.xhtml?id=29600&content=PDF	cattle	Agricultural Animals	y	n	n/a	n/a	n/a	n/a	n	n/a	n/a	n	n/a	n	n/a	y	318	FLIR & FLUKE	ThermaCAM EX320 and Fluke IR flexcam R1	318
171	Ben-Gal et al	2009	IRRIGATION SCIENCE	27	5	367	https://link.springer.com/article/10.1007/s00271-009-0150-7	olive trees	Plants	y	n	n/a	n/a	n/a	n/a	n	n/a	n/a	y	369	y	369	y	370	FLIR	Thermacam SC2000	370
173	Barthlott et al	2009	PLANT BIOLOGY	11	4	499	http://botgart.uni-bonn.de/o_samm/docs/Barthlott-et-al-2008_PlBiol.pdf	Titan arum flowers	Plants	y	n	n/a	n/a	n/a	n/a	n	n/a	n/a	n	n/a	n	n/a	n	n/a	Jenoptik	Variocam	2
175	Kimura et al	2009	ACTA PHYSIOLOGICA	196	4	411	http://onlinelibrary.wiley.com/doi/10.1111/j.1748-1716.2009.01960.x/epdf	human skin	Humans/Medical	y	n	n/a	n/a	n/a	n/a	n	n/a	n/a	y	412	n	n/a	n	n/a	FLIR	model unknown	413
176	Bowers et al	2009	THERIOGENOLOGY	72	3	372	https://ac.els-cdn.com/S0093691X09001514/1-s2.0-S0093691X09001514-main.pdf?_tid=524e61b8-b984-11e7-9db0-00000aab0f6b&acdnat=1508936542_6f3e7d154191c4c0209786889c8cc45a	horses	Agricultural Animals	y	y	0.96	n	n/a	n/a	n	n/a	n/a	y	373	y	373	y	373	Meditherm	Meditherm vet 2000	373
179	Vollsnes et al	2009	JOURNAL OF EXPERIMENTAL BOTANY	60	13	3677	https://oup.silverchair-cdn.com/oup/backfile/Content_public/Journal/jxb/60/13/10.1093/jxb/erp213/2/erp213.pdf?Expires=1509030624&Signature=CHoG13YYUbwyXy5iZH1LL74BShDG6e9J2EBT2jktlclES2u9uOzBQoxzp8IkxKGne1Qb3ROOpSgU--7hZbPQxjrND9pyPNmgMpyY5LaSk8BvIBtHBJJqyjDkPKlYe9JHELDkJELM4pd9D56RiFLD5PdNWUV9tUK5pH3ycnvNwzvO4yO6aFW~SDWobaLqZJmQvDpYxTuT64Nu1eqrsKqjTaA2Hit4s3psFsJs1JYom5Y~CAtZZ2Kbyzc~CgzrE2VyF2Ek…	clover leaves	Plants	y	y	0.95	Jones 2004	http://www.sciencedirect.com/science/article/pii/S0065229604410039	3679	n	n/a	n/a	y	3679	y	3678	y	3679	FLIR	ThermoVision A40M, FLIR	3679
182	Seymour et al	2009	JOURNAL OF EXPERIMENTAL BIOLOGY	212	18	2960	http://jeb.biologists.org/content/jexbio/212/18/2960.full.pdf	beetles	insects	y	n	n/a	n/a	n/a	n/a	n	n/a	n/a	y	2962	n	n/a	y	2962	NEC	Avio TVS-500	2962
184	Kovac et al	2009	JOURNAL OF INSECT PHYSIOLOGY	55	10	959	https://www.sciencedirect.com/science/article/pii/S0022191009002534	wasps	insects	y	y	0.97	Stabentheiner and Schmaranzer 1987,	https://static.uni-graz.at/fileadmin/_Persoenliche_Webseite/stabentheiner_anton/Dokumente/Publikationen/Stabentheiner_Schmaranzer_Thermology_2-1987-563_Thermographic_determination_of_body_temperatures_in_honey_bees_and_hornets__Calibration_and_applications.pdf	3	n - but accuracy effect acknowledged	n/a	n/a	y	3	n	n/a	n	n/a	FLIR	Thermacam SC2000	3
186	Montanholi et al	2009	LIVESTOCK SCIENCE	125	1	22	https://ac.els-cdn.com/S1871141309000766/1-s2.0-S1871141309000766-main.pdf?_tid=e9753010-b98b-11e7-ba2e-00000aab0f02&acdnat=1508939803_0fce3fc9c4ecaa9b8937c7596ef2cac9	cattle	Agricultural Animals	y	y	0.98	manufacturer	n/a	24	y	foil	24	y	23	n	n/a	y	24	FLIR	Thermacam SC2000	24
192	Stubsjoen et al	2009	PHYSIOLOGY & BEHAVIOR	98	5	640	https://ac.els-cdn.com/S0031938409003187/1-s2.0-S0031938409003187-main.pdf?_tid=f129e506-b98d-11e7-a556-00000aab0f6c&acdnat=1508940674_7305d90087123e3d2771cd01ed843b20	sheep	Agricultural Animals	y	n	n/a	n/a	n/a	n/a	n	n/a	n/a	y	642	y	642	y	642	FLIR	InfraCam SD	642
194	Amiel & Wassersug	2010	AMPHIBIA-REPTILIA	31	2	257	http://booksandjournals.brillonline.com/content/journals/10.1163/156853810791069137#	snakes	Reptiles and Amphibians	y	n	n/a	n/a	n/a	n/a	n	n/a	n/a	y	259	n	n/a	n	n/a	FLIR	EX 320	258
196	Rejskova et al	2010	FLORA	205	4	282	https://ac.els-cdn.com/S0367253009001030/1-s2.0-S0367253009001030-main.pdf?_tid=19e24aa4-b990-11e7-91e1-00000aacb362&acdnat=1508941602_5223c9dab7f96f0869304e0291cbffd7	flowers	Plants	y	y	0.97	LOTS		284	y	assumed to be ambient	283	y	283	y	283	y	283	FLIR	Thermacam PM695	283
208	Barbieri et al	2010	MARINE MAMMAL SCIENCE	26	1	53	http://uncw.edu/mmsp/documents/MMBetal.2009.pdf	dolphins	Mammals	y	y	1	n	n/a	n/a	n	n/a	n/a	y	55	n	n/a	n	n/a	FLIR	Agema 570	56
212	Cetingul et al	2010	PROCEEDINGS OF THE ASME INTERNATIONAL HEAT TRANSFER CONFERENCE - 2010, VOL 1: BIO HEAT TRANSFER, BOILING HEAT TRANSFER, COMPUTATIONAL HEAT TRANSFER			31	http://proceedings.asmedigitalcollection.asme.org/proceeding.aspx?articleid=1619993	skin	Humans/Medical	y	n	n/a	n/a	n/a	n/a	n	n/a	n/a	y	3	n	n/a	y	4	Merlin	Merlin midwave IR camera	4
217	Naas et al	2010	SCIENTIA AGRICOLA	67	5	497	http://www.scielo.br/pdf/sa/v67n5/v67n5a01.pdf	chickhen	Birds and Poultry	y	y	0.94-0.95	LOTS		498	y	assumed to be ambient	498	y	498	n	n/a	y	498	n	n	n/a
220	Leuzinger et al	2010	AGRICULTURAL AND FOREST METEOROLOGY	150	1	56	https://www.plantecology.unibas.ch/pdf/2009leuzinger_vogt_koerner.pdf	trees	Plants	y	y	1	Idso et al 1969	http://www.jstor.org/stable/pdf/1933705.pdf?refreqid=excelsior:5f5655d9081a537e4d81ecafc23af10b	2	n	n/a	n/a	y	2	n	n/a	y	2	Infratec	Variocam, Infratec	2
221	Takai et al	2010	FIELD CROPS RESEARCH	115	2	165	https://ac.els-cdn.com/S0378429009003001/1-s2.0-S0378429009003001-main.pdf?_tid=7eb6ac9c-b99d-11e7-aea7-00000aacb361&acdnat=1508947354_6a072e476d3ab7d3a2b9dcab6ea6331a	rice plants	Plants	y	y	0.96	Inoue 1986	https://www.jstage.jst.go.jp/article/jcs1927/55/2/55_2_261/_pdf	166	n	n/a	n/a	y	168	y	168	y	167	NEC	TH9100	167
222	Hristov et al	2010	JOURNAL OF MAMMALOGY	91	1	183	http://www.bioone.org/doi/abs/10.1644/08-MAMM-A-391R.1	bats	Mammals	n	n	n/a	n/a	n/a	n/a	n	n/a	n/a	n	n/a	n	n/a	n	n/a	FLIR/Inigo	Merlin Mid	184
223	Gatto et al	2010	LARGE ANIMAL REVIEW	16	1	7	https://www.cabdirect.org/cabdirect/FullTextPDF/2010/20103049958.pdf	cows	Agricultural Animals	y	y	0.98	n	n/a	9	n	n/a	n/a	n	n/a	n	n/a	y	9	FLIR	model unknown	8
224	Alchanatis et al	2010	PRECISION AGRICULTURE	11	1	27	https://link.springer.com/content/pdf/10.1007%2Fs11119-009-9111-7.pdf	crop canopy	Plants	y	n	n/a	n/a	n/a	n/a	n	n/a	n/a	n	n/a	n	n/a	y	30	FLIR	Thermacam PM545, FLIR	30
226	Bowers et al	2010	CANADIAN JOURNAL OF ANIMAL SCIENCE	90	1	13	http://www.nrcresearchpress.com/doi/pdf/10.4141/CJAS09043	Deer antlers of varied age	Mammals	y	y	1	n	n/a	15	n	n/a	n/a	y	15	n	n/a	y	15	Compix images Inc.	Meditherm Vet 2000	15
227	Reynolds-Henne et al	2010	ENVIRONMENTAL AND EXPERIMENTAL BOTANY	68	1	37	https://boris.unibe.ch/5379/1/2010_JExpBot_68_37.pdf	crop leaves	Plants	y	n	n/a	n/a	n/a	n/a	n	n/a	n/a	y	39	n	n/a	y	39	IRCON	100PHT	39
228	O'Neal et al	2010	JOURNAL OF FIELD ORNITHOLOGY	81	1	71	http://www.jstor.org/stable/pdf/40983809.pdf?refreqid=excelsior%3Ac0d36e63c6cf6ec8cff3ad4e3c383dd9	ducks	Birds and Poultry	n	n	n/a	n/a	n/a	n/a	n	n/a	n/a	n	n/a	n	n/a	n	n/a	FLIR	s-60	75
230	Holzer et al	2010	PFERDEHEILKUNDE	26	2	168	https://scholar.google.com/scholar_lookup?author=K%20Holzer&atitle=Thermographic%20imaging%20in%20the%20diagnosis%20of%20equine%20sinonasal%20disease&publication_year=2010&hl=en&journal=PFERDEHEILKUNDE&volume=26&issue=2&pages=168-172&issn=0177-7726&doi=10.21836/PEM20100208	horses	Agricultural Animals	y	n	n/a	n/a	n/a	n/a	n	n/a	n/a	y	169	n	n/a	y	169	Infratec	Variocam, Infratec	169
236	Meron et al	2010	PRECISION AGRICULTURE	11	2	148	https://link.springer.com/content/pdf/10.1007%2Fs11119-009-9153-x.pdf	crops	Plants	y	n	n/a	n/a	n/a	n/a	n	n/a	n/a	y	152	y	152	y	150	FLIR	SC2000	150
238	Montanholi et al	2010	ANIMAL	4	5	692	https://www.cambridge.org/core/services/aop-cambridge-core/content/view/625A300DD9ECEE0EE921E12EF717755A/S1751731109991522a.pdf/div-class-title-assessing-feed-efficiency-in-beef-steers-through-feeding-behavior-infrared-thermography-and-glucocorticoids-a-href-fn1-ref-type-fn-a-div.pdf	cattle	Agricultural Animals	y	y	0.98	n	n/a	694	n	n/a	n/a	n	n/a	n	n/a	y	694	FLIR	Thermacam SC2000, FLIR	694
240	Weissenbock et al	2010	JOURNAL OF THERMAL BIOLOGY	35	4	182	https://ac.els-cdn.com/S0306456510000276/1-s2.0-S0306456510000276-main.pdf?_tid=d1d2fb14-ba66-11e7-82b2-00000aacb35d&acdnat=1509033823_4b7d33b508bf6d5112db02c85e49485c	elephants	Mammals	y	y	0.98	manufacurer	n/a	183	y	not explained	183	y	183	y	183	y	183	FLIR	ThermaCAM P60	183
242	Infernuso et al	2010	VETERINARY SURGERY	39	4	410	http://onlinelibrary.wiley.com/doi/10.1111/j.1532-950X.2010.00677.x/epdf	dogs	Mammals	y	n	n/a	n/a	n/a	n/a	n	n/a	n/a	y	412	n	n/a	y	412	IRIS	Med 2000 IRIS	412
245	Wang et al	2010	COMPUTERS AND ELECTRONICS IN AGRICULTURE	73	1	74	https://ac.els-cdn.com/S0168169910000839/1-s2.0-S0168169910000839-main.pdf?_tid=23351a12-ba69-11e7-bb04-00000aab0f02&acdnat=1509034818_5c48b858c912f84623ca9c6a1ebdedbd	vegetation	Plants	y	n	n/a	n/a	n/a	n/a	n	n/a	n/a	n	n/a	n	n/a	n	n/a	FLIR	PM570	79
246	Zhang et al	2010	COMPUTERS IN BIOLOGY AND MEDICINE	40	7	650	https://ac.els-cdn.com/S0010482510000806/1-s2.0-S0010482510000806-main.pdf?_tid=5ff0089e-ba6a-11e7-8570-00000aab0f6b&acdnat=1509035350_e131eafb297b162491397d660d72c1da	human hands	Humans/Medical	y	n	n/a	n/a	n/a	n/a	n	n/a	n/a	y	652	y	652	n	n/a	NEC	TH5100	652
248	Chelladurai et al	2010	JOURNAL OF STORED PRODUCTS RESEARCH	46	3	174	https://ac.els-cdn.com/S0022474X1000038X/1-s2.0-S0022474X1000038X-main.pdf?_tid=52602cbc-ba6b-11e7-8d58-00000aacb35d&acdnat=1509035756_e4eb7d6c6f25a48bf685cff1a70f8e9d	fungla infection in wheat	Plants	y	y	0.98	n	n/a	175	n	n/a	n/a	y	175	n	n/a	y	175	FLIR	Thermcam SC500, FLIR	175
249	Tonolla et al	2010	ECOSYSTEMS	13	5	727	http://www.jstor.org/stable/pdf/40792954.pdf?refreqid=excelsior%3A264d940f3eb8e5a26f2663d2cc2fb21f	flooodplain landscape	Earth and Soil	y	y	1	MODIS 2010	https://icess.eri.ucsb.edu/modis/EMIS/html/em.html	731	n	referanced it's influence	731 and supp.	y	730	n	731	y	table 1	NEC	TH 3102 MR	730
250	Polat et al	2010	JOURNAL OF DAIRY SCIENCE	93	8	3525	http://www.journalofdairyscience.org/article/S0022-0302(10)00370-X/abstract	cows	Agricultural Animals	y	n	n/a	n/a	n/a	n/a	n	n/a	n/a	y	3526	y	3526	y	3526	Infrared Solutions	IR Flexcam S	3526
251	Stewart et al	2010	JOURNAL OF DAIRY SCIENCE	93	8	3602	https://ac.els-cdn.com/S0022030210003796/1-s2.0-S0022030210003796-main.pdf?_tid=87b90ef6-bca0-11e7-bc29-00000aab0f6b&acdnat=1509278511_1e9dc8a6755a4963671e2fbe7cbfddd5	cow eyes	Agricultural Animals	y	n	n/a	n/a	n/a	n/a	y	assumed to be ambient	3604	y	3604	y	3604	y	3604	FLIR	Thermacam s60, FLIR	3604
255	Neuner et al	2010	TREE PHYSIOLOGY	30	8	1037	https://academic.oup.com/treephys/article/30/8/1037/1694541	vegetation	Plants	y	n	n/a	n/a	n/a	n/a	n	n/a	n/a	n	n/a	n	n/a	n	n/a	FLIR	ThermaCAM S60, FLIR	1039
256	Vadlejch et al	2010	VETERINARY PARASITOLOGY	171	3	343	http://home.czu.cz/storage/Vadlejch%20et%20al.,%202010a.pdf	rabbits	Mammals	y	n	n/a	n/a	n/a	n/a	n	n/a	n/a	y	344	y	344	n	n/a	n	n	n/a
259	Reichard et al	2010	INTEGRATIVE AND COMPARATIVE BIOLOGY	50	3	358	http://www.jstor.org/stable/pdf/40863363.pdf?refreqid=excelsior%3A62ea17c71d2c2a667b4c726ff985594a	bats	Mammals	y	y	0.98	Monteith & Unsworth 1990	http://denning.atmos.colostate.edu/readings/Monteith.and.Unsworth.4thEd.pdf	361	n	n/a	n/a	y	361	n	n/a	y	360	Indigo	Merlin Mid TIR	360
267	Gianesella et al	2010	ACTA VETERINARIA BRNO	79	3	459	https://actavet.vfu.cz/media/pdf/avb_2010079030459.pdf	cows	Agricultural Animals	y	y	0.93	n	n/a	461	n	n/a	n/a	y	461	n	n/a	y	461	FLIR	Thermacam P25	461
270	Stewart et al	2010	JOURNAL OF DAIRY SCIENCE	93	11	5252	https://ac.els-cdn.com/S0022030210005679/1-s2.0-S0022030210005679-main.pdf?_tid=9753a66e-bca0-11e7-9aa4-00000aacb362&acdnat=1509278538_a1cc96027e93b3454dc3cb03a38f3e3a	cattle	Agricultural Animals	y	n	n/a	n/a	n/a	n/a	y	assumed to be ambient	5253	y	5253	y	5253	y	5253	FLIR	Thermacam S60	5253
271	Reichard et al	2010	PHYSIOLOGICAL AND BIOCHEMICAL ZOOLOGY	83	6	885	http://www.jstor.org/stable/pdf/10.1086/657253.pdf?refreqid=excelsior:f4b78e0e17495e0d6191b18d5ded4218	bats	Mammals	y	y	0.98	Monteith & Unsworth 1990	http://denning.atmos.colostate.edu/readings/Monteith.and.Unsworth.4thEd.pdf	887	n	n/a	n/a	y	886	y	886	y	887	Indigo	Merlin Mid TIR	887
272	Liang et al	2010	PLANT JOURNAL	64	4	679	http://onlinelibrary.wiley.com/doi/10.1111/j.1365-313X.2010.04362.x/epdf	plants	Plants	y	n	n/a	n/a	n/a	n/a	n	n/a	n/a	y	684	y	684	n	n/a	FLIR	Thermacam SC1000	684
273	Traulsen et al	2010	ZUCHTUNGSKUNDE	82	6	437	saved	pigs	Agricultural Animals	y	n	n/a	n/a	n/a	n/a	n	n/a	n/a	y	439	y	439	y	439	Fluke	TiR1	438
275	Nienaber et al	2010	JOURNAL OF THERMAL BIOLOGY	35	8	435	https://www.sciencedirect.com/science/article/pii/S0306456510001026	seals	Mammals	y	y	0.98	measured	n/a	table 1	y	not said	436	y	436	y	436	y	436	FLIR	P25	436
279	Skala et al	2010	PERIODICUM BIOLOGORUM	112	4	475	https://hrcak.srce.hr/63714	human skin	Humans/Medical	y	n	n/a	n/a	n/a	n/a	n	n/a	n/a	n	n/a	n	n/a	n	n/a	NEC	TH7102WL	476
282	Lutz et al	2011	EPIDEMIOLOGIE ET SANTE ANIMALE, NO 59-60	59		169	https://www.cabdirect.org/cabdirect/FullTextPDF/2011/20113184517.pdf	cows	Agricultural Animals	y	n	n/a	n/a	n/a	n/a	n	n/a	n/a	n	n/a	n	n/a	n	n/a	FLIR	thermacam E65	169
286	Hacker et al	2011	PLANT SCIENCE	180	1	149	https://ac.els-cdn.com/S0168945210002001/1-s2.0-S0168945210002001-main.pdf?_tid=4b614bf0-bcb7-11e7-95d8-00000aab0f6c&acdnat=1509288289_36e8cc2f1ec9d1c9eb54984a05f45e4c	cusion plants	Plants	y	n	n/a	n/a	n/a	n/a	n	n/a	n/a	n	n/a	n	n/a	n	n/a	FLIR	Thermacam S60	150
292	Jug et al	2011	WOOD IS GOOD - EU PREACCESSION CHALLENGES OF THE SECTOR			67	https://www.cabdirect.org/cabdirect/FullTextPDF/2011/20113406440.pdf	wood	Plants	y	y	varies	Andrassy et al 2008	not found	70	n	n/a	n/a	y	70	y	70	y	70	FLIR	Thermcam SC2000	68
297	Zaman-Allah et al	2011	FUNCTIONAL PLANT BIOLOGY	38	4	270	http://oar.icrisat.org/26/1/Zaman_et_al_-_FPB_-_Revision_merged.pdf	canopy temperature	Plants	y	n	n/a	n/a	n/a	n/a	n	n/a	n/a	y	4 to 5	y	4 to 5	n	n/a	Infrared solutions	IR FlexCam S	6
301	D'Alterio et al	2011	CZECH JOURNAL OF ANIMAL SCIENCE	56	7	293	http://www.agriculturejournals.cz/publicFiles/43642.pdf	sheep feet	Agricultural Animals	y	y	0.98	n	n/a	294	n	n/a	n/a	y	295	y	295	y	294	FLIR	Thermacam P25	294
302	Stuginski et al	2011	JOURNAL OF VENOMOUS ANIMALS AND TOXINS INCLUDING TROPICAL DISEASES	17	3	287	http://www.scielo.br/pdf/jvatitd/v17n3/08.pdf	snakes	Reptiles and Amphibians	y	y	0.95	Tattersall et al 2004	https://brocku.ca/researchers/glenn_tattersall/PDFs/tattersall%20thermogenesis%20in%20snakes.pdf	288	n	n/a	n/a	y	288	n	n/a	n	n/a	MyChron	MycroScan Thermal Imager	288
306	Pezeshki et al	2011	VETERINARY RESEARCH	42	15		https://veterinaryresearch.biomedcentral.com/track/pdf/10.1186/1297-9716-42-15?site=veterinaryresearch.biomedcentral.com	cattle	Agricultural Animals	y	y	0.93	n	n/a	3	n	n/a	n/a	n	n/a	n	n/a	y	3	FLIR	Thermacam E2	3
308	Johnson et al	2011	JOURNAL OF EQUINE VETERINARY SCIENCE	31	2	63	https://ac.els-cdn.com/S0737080610005484/1-s2.0-S0737080610005484-main.pdf?_tid=6e83e4da-bd57-11e7-bf80-00000aacb35e&acdnat=1509357067_76c5c81ebd12b67abadfe686ca9c3356	pony eyes	Agricultural Animals	y	n	n/a	n/a	n/a	n/a	n	n/a	n/a	n	n/a	n	n/a	y	64	FLIR	ThermaCAM EX320	65
313	Kuraoka & Nakamura	2011	PHYSIOLOGY & BEHAVIOR	102	3	347	https://ac.els-cdn.com/S0031938410004294/1-s2.0-S0031938410004294-main.pdf?_tid=7ef06df0-bd59-11e7-80ae-00000aab0f6c&acdnat=1509357954_ff6f13ba5b472bff2cbfde730053666b	monkeys	Mammals	y	n	n/a	n/a	n/a	n/a	n	n/a	n/a	y	348	n	n/a	y	348	NEC	TH9100MLN	348
319	Chapperon & Seuront	2011	GLOBAL CHANGE BIOLOGY	17	4	1740	http://onlinelibrary.wiley.com/doi/10.1111/j.1365-2486.2010.02356.x/epdf	snails	Other	y	n	n/a	n/a	n/a	n/a	n	n/a	n/a	n	n/a	n	n/a	n	n/a	Fluke	Ti20	1742
321	Paterson et al	2011	MARINE MAMMAL SCIENCE	27	2	295	http://onlinelibrary.wiley.com/doi/10.1111/j.1748-7692.2010.00400.x/epdf	seals	Mammals	y	n	n/a	n/a	n/a	n/a	n	n/a	n/a	y	297	y	297	y	298	FLIR	ThermaCAM E300	298
324	Benitez-Lopez	2011	EUROPEAN JOURNAL OF WILDLIFE RESEARCH	57	2	389	https://hal.archives-ouvertes.fr/file/index/docid/626237/filename/10344_2010_437_ReferencePDF.pdf	birds	Birds and Poultry	n	n	n/a	n/a	n/a	n/a	n	n/a	n/a	n	n/a	n	n/a	n	n/a	Panatec	model unknown	390
325	Kakishima et al	2011	PLANT BIOLOGY	13	3	502	http://onlinelibrary.wiley.com/doi/10.1111/j.1438-8677.2010.00399.x/epdf	flowers	Plants	y	n	n/a	n/a	n/a	n/a	n	n/a	n/a	n	n/a	n	n/a	n	n/a	NEC	Neothermo TVS-600	501
326	Scolari et al	2011	JOURNAL OF SWINE HEALTH AND PRODUCTION	19	3	151	https://www.aasv.org/shap/issues/v19n3/v19n3p151.pdf	pigs	Agricultural Animals	y	n	n/a	n/a	n/a	n/a	n	n/a	n/a	y	152	y	152	y	152	Fluke	IR flexcam Ti55	152
329	Maes et al	2011	AGRICULTURAL AND FOREST METEOROLOGY	151	5	554	https://ac.els-cdn.com/S0168192311000037/1-s2.0-S0168192311000037-main.pdf?_tid=0e64314c-bd64-11e7-bbfb-00000aacb35e&acdnat=1509362489_f16d24b670034dd6509ea60c99c8517f	vegetation	Plants	y	y	0.95	measured	n/a	559	y	atmospheric temp	557	y	557	n	n/a	y	557	FLIR	ThermaCAM SC3000, FLIR	556
330	Liu et al	2011	ENVIRONMENTAL AND EXPERIMENTAL BOTANY	71	2	158	https://www.sciencedirect.com/science/article/pii/S0098847210002546	maize	Plants	y	y	0.95	n	n/a	159	n	n/a	n/a	y	159	n	n/a	y	159	FLIR	ThermaCAM SC3000	159
335	Ferreira et al	2011	BRAZILIAN JOURNAL OF POULTRY SCIENCE	13	2	113	http://www.scielo.br/pdf/rbca/v13n2/a05v13n2.pdf	chicks	Birds and Poultry	y	y	0.86	n	n/a	114	n	n/a	n/a	y	114 and 115	n	n/a	n	n/a	Testo	880	114
336	Lewis et al	2011	PSYCHOPHYSIOLOGY	48	7	887	https://www.ncbi.nlm.nih.gov/pmc/articles/PMC3107393/pdf/nihms-254830.pdf	human face	Humans/Medical	y	n	n/a	n/a	n/a	n/a	n	n/a	n/a	y	4	y	4	n	n/a	Indigo/FLIR	TVS-700 & SC-6000	4
338	Zaproudina et al	2011	CLINICAL PHYSIOLOGY AND FUNCTIONAL IMAGING	31	4	307	http://onlinelibrary.wiley.com/doi/10.1111/j.1475-097X.2011.01018.x/epdf	human skin	Humans/Medical	y	n	n/a	n/a	n/a	n/a	n	n/a	n/a	y	308	y	308	y	308	IRTIS	2000	308
343	Baracho et al	2011	BRAZILIAN JOURNAL OF POULTRY SCIENCE	13	3	177	http://www.scielo.br/pdf/rbca/v13n3/03.pdf	chickens	Birds and Poultry	y	y	0.95	n	n/a	178	y	assumed to be ambient	178	y	178	y	178	n	n/a	Testo	880-st	178
345	Jimenez-Bello et al	2011	AGRICULTURAL WATER MANAGEMENT	98	10	1497	https://ac.els-cdn.com/S0378377411001089/1-s2.0-S0378377411001089-main.pdf?_tid=90ae332a-bd6c-11e7-8ac0-00000aacb361&acdnat=1509366144_4d96ac485b3eab1216501c3415a479dc	trees	Plants	y	y	0.98	Monteith & Unsworth 2008	http://denning.atmos.colostate.edu/readings/Monteith.and.Unsworth.4thEd.pdf	1499	n	n/a	n/a	n	n/a	n	n/a	y	1499	NEC	TH9100 WR	1499
346	O'Shaughnessy et al	2011	AGRICULTURAL WATER MANAGEMENT	98	10	1523	https://ac.els-cdn.com/S0378377411001119/1-s2.0-S0378377411001119-main.pdf?_tid=e014e5d4-bd6d-11e7-beff-00000aacb35d&acdnat=1509366707_79082ada2a8df0272ce2ad686f4d7b00	vegetation	Plants	y	n	n/a	n/a	n/a	n/a	n	n/a	n/a	y	1529	y	1529	y	1526	FLIR	SC2000	1526
351	Oerke et al	2011	PRECISION AGRICULTURE	12	5	699	https://link.springer.com/content/pdf/10.1007%2Fs11119-010-9212-3.pdf	leaves	Plants	y	y	1	n	n/a	702	n	n/a	n/a	y	701	y	701	y	702	Jenoptik	Varioscan 3201 ST	702
352	Nascimento et al	2011	BRAZILIAN JOURNAL OF POULTRY SCIENCE	13	4	259	http://www.scielo.br/pdf/rbca/v13n4/v13n4a07.pdf	chickens	Birds and Poultry	y	y	0.95	Cangas et al 2008	https://oup.silverchair-cdn.com/oup/backfile/Content_public/Journal/ps/87/12/10.3382/ps.2007-00326/2/poultrysci87-2493.pdf?Expires=1509466084&Signature=Wsj7XyVEyCoh9YGeazy7HzTPZn3S0-U-qPlIClHGBCIanz-5cn7XH5vfwy-TGkDlu3~npBjvGIKegNxW1C~sT-snDQzhEngbaeqXl5U8ETZGDc7-pgyjHclkqzCzjKZ3kD2zGptpWNl9A1GWZeGl63K5~gUo5WOwv1quGjS3Y8UT~wjeUQl7I2Ub4Q~JF9sFyClCVZhl8aKjCJPbJ7-8zDy9Ui6uhv0DlwuYfg3ZpMDDukmmihvAYgJ…	260	n	n/a	n/a	y	260	n	n/a	n	n/a	Testo	880	260
356	Hunt et al	2011	JOURNAL OF THERMAL BIOLOGY	36	7	443	https://ac.els-cdn.com/S0306456511001033/1-s2.0-S0306456511001033-main.pdf?_tid=0707ff1e-bd7d-11e7-823e-00000aab0f01&acdnat=1509373214_75152ee6d18e0bb52a636065c28e7350	locust	insects	y	y	0.96-ish	measured	n/a	447	y	assumed to be ambient	446	y	446	n	n/a	y	fig 2	FLIR	A10	444
360	Rutkowski et al	2011	PHOTOCHEMISTRY AND PHOTOBIOLOGY	87	6	1442	http://onlinelibrary.wiley.com/doi/10.1111/j.1751-1097.2011.00975.x/epdf	hands	Humans/Medical	y	n	n/a	n/a	n/a	n/a	n	n/a	n/a	n	n/a	n	n/a	n	n/a	FLIR	SC 640	1443
362	Belin et al	2011	COMPUTERS AND ELECTRONICS IN AGRICULTURE	79	2	236	https://www.sciencedirect.com/science/article/pii/S0168169911002328	seedlings	Plants	n	n	n/a	n/a	n/a	n/a	n	n/a	n/a	n	n/a	n	n/a	n	n/a	FLIR	SC 5000	237
365	Gloster et al	2011	BMC VETERINARY RESEARCH	7		73	https://bmcvetres.biomedcentral.com/track/pdf/10.1186/1746-6148-7-73?site=bmcvetres.biomedcentral.com	cow feet	Agricultural Animals	y	y	0.95	n	n/a	2	n	n/a	n/a	y	2	n	n/a	y	2	Fluke	TIR1	2
366	Cox & Smith	2011	CORAL REEFS	30	4	1109	https://link.springer.com/content/pdf/10.1007%2Fs00338-011-0799-2.pdf	coral reef organisms	Other	y	y	various	measured	n/a	table 1	n	n/a	n/a	y	1111	n	n/a	y	1111	FLIR	Handy Thermo TVS-200 EX or BX320	1111
367	Al-Ramamneh et al	2011	JOURNAL OF ANIMAL SCIENCE	89	12	4294	https://scholar.google.com/scholar_lookup?author=D%20Al-Ramamneh&atitle=Effect%20of%20shearing%20on%20water%20turnover%20and%20thermobiological%20variables%20in%20German%20Blackhead%20mutton%20sheep&publication_year=2011&hl=en&journal=JOURNAL%20OF%20ANIMAL%20SCIENCE&volume=89&issue=12&pages=4294-4304&issn=0021-8812&doi=10.2527/jas.2011-3982&pmid=21788433	sheep	Agricultural Animals	y	y	0.98	n	n/a	4296	y	not said- ambient T?	4297	y	4297	y	4297	y	4297	Agema	Thermovision 900	4296
368	Cooke et al	2011	JOURNAL OF APPLIED PHYSIOLOGY	111	6	1813	https://www.physiology.org/doi/abs/10.1152/japplphysiol.00726.2011	human skin	Humans/Medical	y	n	n/a	n/a	n/a	n/a	n	n/a	n/a	y	1813	n	n/a	y	1814	FLIR	SC-4000	1814
373	Banic et al	2011	PERIODICUM BIOLOGORUM	113	4	439	http://hrcak.srce.hr/76949	humans	Humans/Medical	y	n	n/a	n/a	n/a	n/a	n	n/a	n/a	y	440	y	440	n	n/a	NEC	Thermo Tracer TH7102102WL	440
374	Borojevic et al	2011	PERIODICUM BIOLOGORUM	113	4	445	http://hrcak.srce.hr/index.php?show=clanak&id_clanak_jezik=114211	human hands	Humans/Medical	y	n	n/a	n/a	n/a	n/a	n	n/a	n/a	y	446	y	446	n	n/a	NEC	Thermo Tracer TH7102102WL	446
375	Kulis et al	2011	PERIODICUM BIOLOGORUM	113	4	449	http://hrcak.srce.hr/76975	human skin	Humans/Medical	y	n	n/a	n/a	n/a	n/a	n	n/a	n/a	y	4	n	n/a	y	450	NEC	Thermo Tracer TH7102102W	450
376	Rehmani et al	2011	PLANT METHODS	7		41	https://plantmethods.biomedcentral.com/track/pdf/10.1186/1746-4811-7-41?site=plantmethods.biomedcentral.com	vegetation	Plants	y	y	0.96	n	n/a	Fig 11	y	atmospheric T	Fig 11	y	Fig 11	y	Fig 11	y	Fig 11	FLIR	ThermaCam P25, FLIR	11
377	Scherrer et al	2011	AGRICULTURAL AND FOREST METEOROLOGY	151	12	1632	https://ac.els-cdn.com/S0168192311002127/1-s2.0-S0168192311002127-main.pdf?_tid=297a84f4-bf0d-11e7-84cd-00000aab0f6c&acdnat=1509545071_40c9717c94d112cf5824b2c8e2c74975	canopy vegetation	Plants	y	n	n/a	n/a	n/a	n/a	n	n/a	n/a	y	1633	y	1633	y	1634	Infratec	VarioCam, infratec	1634
381	Giloh et al	2012	POULTRY SCIENCE	91	1	175	https://academic.oup.com/ps/article/91/1/175/1598172	chickens	Birds and Poultry	y	n	n/a	n/a	n/a	n/a	n	n/a	n/a	y	177	y	177	n	n/a	FLIR	PM545	176
385	Rejskova et al	2012	ECOHYDROLOGY	5	1	19	http://onlinelibrary.wiley.com/doi/10.1002/eco.184/epdf	grass	Plants	y	y	0.98	Geiger et al 2003		20	n	n/a	n/a	y	21	y	20	n	n/a	FLIR	ThermCAM PM695	21
386	Cetinkaya & Demirutku	2012	TURKISH JOURNAL OF VETERINARY & ANIMAL SCIENCES	36	1	43	http://journals.tubitak.gov.tr/veterinary/issues/vet-12-36-1/vet-36-1-7-1102-791.pdf	horses	Agricultural Animals	y	y	0.96	n	n/a	Fig 1	n	n/a	n/a	n	n/a	n	n/a	n	n/a	FLIR	P45	44
387	Costa et al	2012	FUNCTIONAL PLANT BIOLOGY	39	3	179	http://www.publish.csiro.au/fp/fp11156	vine canopy	Plants	y	y	0.96	Grant et al 2006 ; Leinonen et al 2006	http://onlinelibrary.wiley.com/doi/10.1111/j.1399-3054.2006.00686.x/epdf : http://onlinelibrary.wiley.com/doi/10.1111/j.1365-3040.2006.01528.x/epdf	C	y	foil mirror	C	y	C	y	B	y	C	Infrared solutions	IR Snapshot 525	C
392	Stahlschmidt et al	2012	BASIC AND APPLIED ECOLOGY	13	2	196	https://ac.els-cdn.com/S1439179112000151/1-s2.0-S1439179112000151-main.pdf?_tid=00e469cc-bf19-11e7-bdfc-00000aab0f26&acdnat=1509550157_ca101d53551514a16b6b706fe5cf2802	Bats	Mammals	n	n	n/a	n/a	n/a	n/a	n	n/a	n/a	n	n/a	n	n/a	y	198	Infratec	VarioCam, Infra Tec	198
393	Burcham et al	2012	URBAN FORESTRY & URBAN GREENING	11	2	169	https://ac.els-cdn.com/S1618866712000064/1-s2.0-S1618866712000064-main.pdf?_tid=d5e1ccc8-bf19-11e7-889e-00000aacb361&acdnat=1509550514_4804b61b07226dc8a26e367fef0691ea	Trees	Plants	y	n	n/a	n/a	n/a	n/a	n	n/a	n/a	y	170	n	n/a	y	171	Thermoteknix	VisIR 640	170
395	Abdoun et al	2012	ANIMAL SCIENCE JOURNAL	83	7	556	http://onlinelibrary.wiley.com/doi/10.1111/j.1740-0929.2011.00993.x/epdf	Camels	Mammals	y	y	0.95	n	n/a	557	n	n/a	n/a	y	557	y	557	n	n/a	Thermoteknix	VisIR-Ti200	557
398	Loudermilk et al	2012	INTERNATIONAL JOURNAL OF WILDLAND FIRE	21	7	882	https://pdfs.semanticscholar.org/4d5a/29b44121b977fd7bbb13ae2c0554fd60c6ec.pdf	forests	Plants	y	y	0.96	Wan unpublished	n	892	n	n/a	n/a	y	883	y	883	y	883	FLIR	s60	883
401	Swain et al	2012	ISRAEL JOURNAL OF PLANT SCIENCES	60	1	25	http://www.tandfonline.com/doi/pdf/10.1560/IJPS.60.1-2.25	leaves	Plants	y	y	0.96	Jensen 2007	https://scholar.google.co.uk/scholar?hl=en&as_sdt=0%2C5&q=Jensen%2C+J.R.+2007.+Remote+sensing+of+the+environment%3A+an+earth+resource+perspective%2C+2nd+Ed.+Prentice+Hall%2C+Upper+Saddle+River%2C+NJ%2C+592+pp.&btnG=	29	n	n/a	n/a	y	27	y	27	y	29	FLIR	ThermaCAM 640	29
402	Kafer et al	2012	MITTEILUNGEN DER DEUTSCHEN GESELLSCHAFT FUR ALLGEMEINE UND ANGEWANDTE ENTOMOLOGIE, BD 18	18		257	https://static.uni-graz.at/fileadmin/_Persoenliche_Webseite/stabentheiner_anton/Dokumente/Publikationen/Kaefer_et_al_Mitt_DGaaE_18-2012-257_Resting_metabolism_of_vespine_wasps__Vespula_sp__in_comparison_with_other_arthropods.pdf	wasps	insects	y	y	0.97	measured	n/a	258	y	assumed to be ambient	258	y	258	n	n/a	n	n/a	FLIR	ThermaCam SC2000	258
403	Sa'ad et al	2012	2ND INTERNATIONAL CONFERENCE ON BIO-SENSING TECHNOLOGY	6		165	https://ac.els-cdn.com/S1876619612002173/1-s2.0-S1876619612002173-main.pdf?_tid=419c94c8-bf21-11e7-95cd-00000aacb361&acdnat=1509553701_fb329ad135a1197f1136f0988ce15516	mango	Plants	n	n	n/a	n/a	n/a	n/a	n	n/a	n/a	n	n/a	n	n/a	n	n/a	Infratec	VarioCam	168
407	Ludwig et al	2012	ACTA OF BIOENGINEERING AND BIOMECHANICS	14	3	41	http://www.actabio.pwr.wroc.pl/Vol14No3/6.pdf	skin	Humans/Medical	y	y	0.95	n	n/a	43	n	n/a	n/a	y	43	y	43	y	43	NEC	TVS-700	43
408	Alijumaah et al	2012	ITALIAN JOURNAL OF ANIMAL SCIENCE	11		e73	http://www.tandfonline.com/doi/pdf/10.4081/ijas.2012.e73?needAccess=true	camels	Mammals	y	y	0.97	Monteith & Unsworth 2008	http://denning.atmos.colostate.edu/readings/Monteith.and.Unsworth.4thEd.pdf	415	y	assumed to be ambient	414	y	415	y	415	y	415	Thermoteknix	VisIR-Ti200	415
409	Alsaaod & Buscher	2012	JOURNAL OF DAIRY SCIENCE	95	2	735	https://ac.els-cdn.com/S0022030212000264/1-s2.0-S0022030212000264-main.pdf?_tid=6d98153e-c084-11e7-97a5-00000aab0f01&acdnat=1509706246_ae5acac3993c8d6c6f2f8580cfc09132	cow feet	Agricultural Animals	y	y	0.98	n	n/a	737	y	ambient	738	y	738	n	n/a	n	n/a	Infratec	VarioCam, Jenoptik	737
411	Vianna & Carrive	2012	JOURNAL OF THERMAL BIOLOGY	37	2	125	https://ac.els-cdn.com/S0306456511001653/1-s2.0-S0306456511001653-main.pdf?_tid=26e96b2c-c086-11e7-aee1-00000aab0f27&acdnat=1509706987_78e2497f500564a1d8428255a09b2113	stressed mice	Mammals	y	y	0.98	References Marks et al 2009, which in turn references Vianna & Carrive 2005	https://www.physiology.org/doi/abs/10.1152/ajpregu.90723.2008	126 (R1240 in reference)	n	n/a	n/a	y	126	n	n/a	y	126	FLIR	ThermaCam P45	126
415	Padhi et al	2012	FIELD CROPS RESEARCH	126		45	https://ac.els-cdn.com/S0378429011003303/1-s2.0-S0378429011003303-main.pdf?_tid=5439b796-c0a2-11e7-8fb9-00000aab0f6b&acdnat=1509719089_b14dc66430388664412b966d672589dd	leaves	Plants	y	y	0.97	Wittich 1997	https://link.springer.com/content/pdf/10.1007/s004840050054.pdf	47	n	n/a	n/a	y	46	y	46	y	47	NEC	TH7800	47
416	Ito-Inaba et al	2012	PLANT CELL AND ENVIRONMENT	35	3	554	http://onlinelibrary.wiley.com/doi/10.1111/j.1365-3040.2011.02435.x/epdf	skunk cabbage	Plants	y	n	n/a	n/a	n/a	555	n	n/a	n/a	n	n/a	n	n/a	n	n/a	NEC	TH9100 MR/WR	555
418	Reinert et al	2012	TREE PHYSIOLOGY	32	3	294	https://academic.oup.com/treephys/article/32/3/294/1688224	vegetation	Plants	y	y	0.95-0.96	Jones 2004	http://www.sciencedirect.com/science/article/pii/S0065229604410039	297	y	assumed to be ambient	297	y	297	y	297	y	296	Fluke	Ti32	296
420	Franze et al	2012	ZUCHTUNGSKUNDE	84	2	158	saved	dairy cows	Agricultural Animals	y	n	n/a	n/a	n/a	165	y	assumed to be ambient	160	y	160	y	160	y	160	DIAS	640L compact	160
423	Gonzalez-Dugo et al	2012	AGRICULTURAL AND FOREST METEOROLOGY	154		156	https://ac.els-cdn.com/S0168192311003224/1-s2.0-S0168192311003224-main.pdf?_tid=7f6655e6-c0a7-11e7-be74-00000aacb360&acdnat=1509721309_055fb2a54ad6f6c91f3b0f625325a170	vegetation	Plants	y	y	0.98	Berni et al 2009	https://scholar.google.co.uk/scholar?hl=en&as_sdt=0%2C5&q=J.A.J.+Berni%2C+P.J.+Zarco-Tejada%2C+L.+Su%C3%A1rez%2C+E.+Fereres+Thermal+and+narrowband+multispectral+remote+sensing+for+vegetation+monitoring+from+an+unmanned+aerial+vehicle+IEEE+Trans.+Geosci.+Remote+Sens.%2C+47+%283%29+%282009%29%2C+pp.+722-738&btnG=	175 (729 in reference)	n	n/a	n/a	y	157	y	157	y	157	Thermoteknix	Miricle 640	157
426	Franzetti et al	2012	EUROPEAN JOURNAL OF WILDLIFE RESEARCH	58	2	385	https://link.springer.com/article/10.1007/s10344-011-0587-x	boar	Mammals	n	n	n/a	n/a	n/a	n/a	n	n/a	n/a	n	n/a	n	n/a	n	n/a	FLIR	ThermaCAM PM545, B640	5
427	Suzuki et al	2012	JOURNAL OF APPLIED PHYSIOLOGY	112	7	1215	https://www.physiology.org/doi/abs/10.1152/japplphysiol.00867.2011	rats	Mammals	y	n	n/a	n/a	n/a	n/a	n	n/a	n/a	y	1216	n	n/a	n	n/a	FLIR	Merlin Mid	1216
429	Lopez et al	2012	SCIENTIA HORTICULTURAE	137		49	https://ac.els-cdn.com/S0304423812000428/1-s2.0-S0304423812000428-main.pdf?_tid=91f8743e-c0aa-11e7-9c09-00000aacb35d&acdnat=1509722628_85fb02f2ab04c98279cae8b940b14dbb	leaves	Plants	y	y	0.9 ish	measured	n/a	throughout	y	foil mirror	51	y	51	y	51	y	50	FLIR	ThermoVision A40-M	50
434	Kafer et al	2012	JOURNAL OF INSECT PHYSIOLOGY	58	5	679	https://ac.els-cdn.com/S0022191012000169/1-s2.0-S0022191012000169-main.pdf?_tid=4a4d90a8-c0ad-11e7-b8db-00000aab0f6b&acdnat=1509723796_2d27ec0c68d8cf6fe117a98f8e4fd81b	wasps	insects	y	y	0.97	Kovac et al 2007 & others	https://static.uni-graz.at/fileadmin/_Persoenliche_Webseite/stabentheiner_anton/Dokumente/Publikationen/Stabentheiner_Schmaranzer_Thermology_2-1987-563_Thermographic_determination_of_body_temperatures_in_honey_bees_and_hornets__Calibration_and_applications.pdf	680	n	n/a	n/a	y	680	y	680	n	n/a	FLIR	ThermaCam SC2000 NTS	680
437	McGreevy et al	2012	JOURNAL OF VETERINARY BEHAVIOR-CLINICAL APPLICATIONS AND RESEARCH	7	3	142	https://ac.els-cdn.com/S1558787811001432/1-s2.0-S1558787811001432-main.pdf?_tid=c87a3336-c0ae-11e7-b665-00000aab0f26&acdnat=1509724438_bb9c535337562800e96a5fb86366c46f	horses	Agricultural Animals	y	n	n/a	n/a	n/a	n/a	n	n/a	n/a	n	n/a	n	n/a	n	n/a	Wuham Guide	M8	145
441	Moritz & Dominy	2012	INTERNATIONAL JOURNAL OF PRIMATOLOGY	33	3	588	https://link.springer.com/content/pdf/10.1007%2Fs10764-011-9575-y.pdf	Aye ayes	Mammals	y	n	n/a	n/a	n/a	n/a	n	n/a	n/a	n	n/a	n	n/a	n	n/a	FLIR	ThermaCAM SC640, FLIR	592
449	Sykes et al	2012	THERIOGENOLOGY	78	1	147	https://ac.els-cdn.com/S0093691X12000659/1-s2.0-S0093691X12000659-main.pdf?_tid=756dc456-c0b7-11e7-aca7-00000aacb35d&acdnat=1509728164_d8d931abcdac8c24f422e0a07f5b9b03	pigs	Agricultural Animals	y	y	1	n	n/a	148	y	assumed to be ambient	148	y	148	n	n/a	y	148	FLIR	ThermocAM S60	148
450	Turner et al	2012	POULTRY SCIENCE	91	7	1558	https://academic.oup.com/ps/article/91/7/1558/1522266	chickens	Birds and Poultry	n	n	n/a	n/a	n/a	n/a	n	n/a	n/a	y	n/a	n	n/a	n	n/a	FLIR	ThermoCam EX320	1561
452	Pramsohler et al	2012	TREE PHYSIOLOGY	32	7	819	https://academic.oup.com/treephys/article/32/7/819/1644235	vegetation	Plants	y	n	n/a	n/a	n/a	n/a	n	n/a	n/a	y	821	n	n/a	n	n/a	FLIR	ThermaCAM S60	821
454	Harshaw et al	2012	PHYSIOLOGY & BEHAVIOR	106	5	106	https://ac.els-cdn.com/S0031938412001898/1-s2.0-S0031938412001898-main.pdf?_tid=d30ec5aa-c559-11e7-aa8f-00000aacb360&acdnat=1510237704_cafa2ecd5197c0f9549281ebb7eb7947	mice	Mammals	y	n	n	n/a	n/a	n/a	n	n/a	n/a	y	673	n	n/a	y	672	Infrared Cameras Inc	ICI 7320 P	672
455	Moe et al	2012	PHYSIOLOGY & BEHAVIOR	106	4	527	https://ac.els-cdn.com/S0031938412001370/1-s2.0-S0031938412001370-main.pdf?_tid=12772330-c55b-11e7-a1e3-00000aab0f02&acdnat=1510238240_149d9ea20125fab664013cc971e2c079	hens	Birds and Poultry	y	y	0.96	n	n/a	528	y	assumed to be ambient	528	y	528	n	n/a	y	528	FLIR	Thermovision A40, FLIR	528
457	Bakken et al	2012	JOURNAL OF EXPERIMENTAL BIOLOGY	215	15	2621	http://jeb.biologists.org/content/jexbio/215/15/2621.full.pdf	snakes	Reptiles and Amphibians	y	y	1	n	n/a	2629	n	n/a	n/a	n	n/a	n	n/a	n	n/a	FLIR	PM575	2624
460	Kusumi et al	2012	JOURNAL OF EXPERIMENTAL BOTANY	63	15	5635	https://academic.oup.com/jxb/article/63/15/5635/659030	arabidopsis	Plants	y	y	1	Hashimoto et al 2006	http://www.esalq.usp.br/lepse/imgs/conteudo_thumb/Arabidopsis-HT1-kinase-controls-stomatal-movements-in-response-to-CO2.pdf	5636 (396 in reference)	n	n/a	n/a	y	5636	y	5636	y	in Hashimoto et al 2006	NEC	TVS-8500	5636
461	Addah et al	2012	CANADIAN JOURNAL OF ANIMAL SCIENCE	92	3	381	http://www.nrcresearchpress.com/doi/pdf/10.4141/cjas2012-016	bags full of sewage	Other	y	n	n/a	n/a	n/a	n/a	n	n/a	n/a	y	table 4	y	table 4	y	384	FLIR	T200 IR	384
462	Stokes et al	2012	VETERINARY JOURNAL	193	3	674	https://ac.els-cdn.com/S1090023312003000/1-s2.0-S1090023312003000-main.pdf?_tid=8b250358-c563-11e7-9dc4-00000aab0f6c&acdnat=1510241878_f7b5991ef74771299148f28f8d939f88	cow feet	Agricultural Animals	y	y	0.98	n	n/a	Fig. 1	n	n/a	n/a	y	675	n	n/a	y	675	FLIR	ThermaCAM E2, FLIR	676
463	Paterson et al	2012	JOURNAL OF THERMAL BIOLOGY	37	6	454	https://ac.els-cdn.com/S0306456512000563/1-s2.0-S0306456512000563-main.pdf?_tid=3ac891c0-c565-11e7-8def-00000aab0f26&acdnat=1510242602_23c735d78124096639b4d33abd26df53	seals	Mammals	y	y	0.98	n	n/a	456	y	assumed to be ambient	455	y	455	y	455	n	n/a	FLIR	Thermacam E300	455
465	Zahradnik et al	2012	CANADIAN ENTOMOLOGIST	144	5	658	https://www.cambridge.org/core/services/aop-cambridge-core/content/view/49BC1BE884066574A7E2221E1C0D7F67/S0008347X12000715a.pdf/douglasfir_cone_gall_midges_respond_to_shape_and_infrared_wavelength_attributes_of_host_tree_branches.pdf	tree cones	Plants	y	y	0.95	Jiang et al 2006	http://www.umbc.edu/rssipl/people/aplaza/Papers/Journals/2008.TGARS.LandSurface.pdf	660	y	foil mirror	660	y	660	y	660	y	660	FLIR	Thermovision 550	659
466	Schaefer et al	2012	RESEARCH IN VETERINARY SCIENCE	93	2	928	https://ac.els-cdn.com/S0034528811003833/1-s2.0-S0034528811003833-main.pdf?_tid=b26622d8-c56a-11e7-ab82-00000aacb35d&acdnat=1510244951_c381109c4c4c440bba08716361aca75d	cows	Agricultural Animals	y	n	n/a	n/a	n/a	n/a	n	n/a	n/a	n	n/a	n	n/a	y	930	FLIR	S60	930
469	Templeton et al	2012	RADIATION RESEARCH	178	4	295	http://www.bioone.org/doi/abs/10.1667/RR2745.1	Mice	Mammals	y	n	n/a	n/a	n/a	n/a	n	n/a	n/a	n	n/a	n	n/a	y	fig 3.	Indigo	phoenix mid wave	296
472	Garcia-Tejero et al	2012	FRUITS	67	6	463	https://www.cambridge.org/core/services/aop-cambridge-core/content/view/225BF0700E22A0F2840B24C0E495F15A/S0248129412000400a.pdf/approach-to-assess-infrared-thermal-imaging-of-almond-trees-under-water-stress-conditions.pdf	canopy temp	Plants	y	y	0.98	Monteith & Unsworth 2008	http://denning.atmos.colostate.edu/readings/Monteith.and.Unsworth.4thEd.pdf	465	n	n/a	n/a	y	table 1	n	n/a	y	465	FLIR	SC660	465
473	Hahn et al	2012	BIOLOGY LETTERS	8	5	864	http://rsbl.royalsocietypublishing.org/content/roybiolett/8/5/864.full.pdf	human skin	Humans/Medical	y	y	0.98	Steketee 1973	http://iopscience.iop.org/article/10.1088/0031-9155/18/5/307/pdf	864	n	n/a	n/a	n	n/a	n	n/a	y	864	Testo	881-1	864
475	Gan et al	2012	JOURNAL OF THERMAL BIOLOGY	37	7	502	https://ac.els-cdn.com/S0306456512001003/1-s2.0-S0306456512001003-main.pdf?_tid=b083c89e-c56f-11e7-b47d-00000aab0f01&acdnat=1510247095_151b4281c2ef689121ad5f8a5785da6b	human skin	Humans/Medical	y	n	n/a	n/a	n/a	n/a	n	n/a	n/a	y	503	y	503	n	n/a	FLIR	A320	503
476	Hauvik & Mercer	2012	JOURNAL OF THERMAL BIOLOGY	37	7	510	https://ac.els-cdn.com/S0306456512001027/1-s2.0-S0306456512001027-main.pdf?_tid=1b5eff6a-c572-11e7-871d-00000aab0f26&acdnat=1510248133_e27eed749c44430da88f22a6312da12a	human heads	Humans/Medical	y	y	0.98	n	n/a	512	n	n/a	n/a	y	511	y	511	y	512	FLIR	ThermaCam S65HS	512
477	Erdsack et al	2012	JOURNAL OF THERMAL BIOLOGY	37	7	537	https://ac.els-cdn.com/S0306456512001040/1-s2.0-S0306456512001040-main.pdf?_tid=cda6984a-c572-11e7-b772-00000aacb360&acdnat=1510248432_01e894c2cd695a6801efd8c625581376	seals	Mammals	y	y	0.97	Monteith & Unsworth 2008	http://denning.atmos.colostate.edu/readings/Monteith.and.Unsworth.4thEd.pdf	538	n	minimised with shading?	538	y	538	y	538	y	538	Fluke	Ti25	538
478	Fuentes et al	2012	IRRIGATION SCIENCE	30	6	523	https://link.springer.com/content/pdf/10.1007%2Fs00271-012-0375-8.pdf	canopy	Plants	y	n	n/a	n/a	n/a	n/a	n	n/a	n/a	n	n/a	n	n/a	y	526	FLIR	B360	526
480	Berdugo et al	2012	PESTICIDE BIOCHEMISTRY AND PHYSIOLOGY	104	3	171	https://ac.els-cdn.com/S0048357512001174/1-s2.0-S0048357512001174-main.pdf?_tid=84aa739e-c574-11e7-9919-00000aacb35e&acdnat=1510249169_5a6fc031eb4b0a1e2299e9b3511e55bb	plants	Plants	y	n	n/a	n/a	n/a	n/a	n	n/a	n/a	y	172	y	172	n	n/a	Jenoptik	Varioscan 3201 ST	172
482	Hackl et al	2012	JOURNAL OF AGRONOMY AND CROP SCIENCE	198	6	415	http://onlinelibrary.wiley.com/doi/10.1111/j.1439-037X.2012.00512.x/epdf	canopy	Plants	y	y	0.96	Jackson et al 1981	http://onlinelibrary.wiley.com/doi/10.1029/WR017i004p01133/epdf	417	n	n/a	n/a	y	418	y	418	y	417	FLIR	T335	417
486	Valera et al	2012	JOURNAL OF EQUINE VETERINARY SCIENCE	32	12	827	https://ac.els-cdn.com/S0737080612001025/1-s2.0-S0737080612001025-main.pdf?_tid=993a15b0-c94a-11e7-b3e8-00000aab0f02&acdnat=1510670970_7828c4b9fe5fb026ab5f59a717a741de	horse eyes	Agricultural Animals	y	n	n/a	n/a	n/a	n/a	n	n/a	n/a	y	828	y	828	y	828	FLIR	Thermacam i70, Flir	828
487	Wang et al	2012	PLANT PHYSIOLOGY AND BIOCHEMISTRY	61		153	https://ac.els-cdn.com/S0981942812002690/1-s2.0-S0981942812002690-main.pdf?_tid=964395e2-c94b-11e7-8e9a-00000aab0f6c&acdnat=1510671394_2ecef4264770a3638326d0aaccf0ae20	leaves	Plants	y	n	n/a	n/a	n/a	n/a	y	assumed to be ambient	159	y	159	y	159	n	n/a	FLIR	SC 620	159
488	Vanionpaa et al	2012	JOURNAL OF VETERINARY MEDICAL SCIENCE	74	12	1539	https://www.jstage.jst.go.jp/article/jvms/74/12/74_12-0180/_pdf	dogs	Mammals	y	y	1	n	n/a	1540	n	acknoledges issue of exclusion	n/a	y	1540	n	n/a	y	1540	FLIR	3 FLIR models	1539
494	Paim et al	2013	INTERNATIONAL JOURNAL OF BIOMETEOROLOGY	57	1	59	https://link.springer.com/content/pdf/10.1007%2Fs00484-012-0533-y.pdf	sheep	Agricultural Animals	y	y	0.95	n	n/a	1541	n	does talk about reflectance but not in context of reflected temperature	n/a	y	61	y	61	n	n/a	FLIR	i series	60
495	Kerridge et al	2013	AGRICULTURAL WATER MANAGEMENT	116		128	https://ac.els-cdn.com/S0378377412001850/1-s2.0-S0378377412001850-main.pdf?_tid=4ea3b4ec-c950-11e7-9c59-00000aab0f02&acdnat=1510673421_201123547eeb2033a28c4cbcee08a99e	soil temp	Earth and Soil	y	y	0.95	n	n/a	Fig 5	y	not given assumed left at 20	Fig 5	y	Fig 5	n	n/a	y	Fig 5	FLIR	S65	130
496	Mellish et al	2013	JOURNAL OF THERMAL BIOLOGY	38	1	10	https://ac.els-cdn.com/S0306456512001386/1-s2.0-S0306456512001386-main.pdf?_tid=76033cb4-c951-11e7-8e60-00000aab0f01&acdnat=1510673917_22cda91ee592f6ce268478331a469fb1	seals and elephant seals	Mammals	y	y	0.98	n	n/a	11	y	average of other corner of lab?	11	y	11	y	11	y	11	FLIR	P25	11
499	Rodriuez-Prieto et al	2013	MARINE MAMMAL SCIENCE	29	1	167	http://onlinelibrary.wiley.com/doi/10.1111/j.1748-7692.2011.00533.x/epdf	seals	Mammals	y	y	0.95	Speakman & Ward 1998	https://scholar.google.com/scholar?q=Infrared+thermography%3A+Principles+and+applications	170	y	ambient	170	y	170	y	170	y	170	FLIR	ThermaCAM E45, FLIR	168
501	Berdugo et al	2013	FUNCTIONAL PLANT BIOLOGY	40	7	677	https://scholar.google.com/scholar_lookup?author=C%20Berdugo&atitle=Sensors%20and%20imaging%20techniques%20for%20the%20assessment%20of%20the%20delay%20of%20wheat%20senescence%20induced%20by%20fungicides&publication_year=2013&hl=en&journal=FUNCTIONAL%20PLANT%20BIOLOGY&volume=40&issue=7&pages=677-689&issn=1445-4408&doi=10.1071/FP12351	Plants	Plants	y	n	n/a	n/a	n/a	n/a	n	n/a	n/a	y	678	y	678	n	n/a	Jenoptik	Varioscan 3021 ST	681
502	Steinmeyer et al	2013	FUNCTIONAL PLANT BIOLOGY	40	7	700	http://centaur.reading.ac.uk/32198/2/2013%20-%20Steinmeyer%20et%20al%20-%20Flowering%20and%20ear%20temperature%20in%20wheat.pdf	leaves	Plants	y	n	n/a	n/a	n/a	n/a	n	n/a	n/a	n	n/a	n	n/a	y	8	FLIR	T335	8
503	Abudabos et al	2013	ITALIAN JOURNAL OF ANIMAL SCIENCE	12	2	e35	http://www.tandfonline.com/doi/pdf/10.4081/ijas.2013.e35?needAccess=true	chickens	Birds and Poultry	y	y	0.97	Monteith & Unsworth 2008	http://denning.atmos.colostate.edu/readings/Monteith.and.Unsworth.4thEd.pdf	214	n	n/a	n/a	y	214	n	n/a	y	214	Thermoteknix	VIS IR Ti200	214
509	Bellvert et al	2013	PRECISION AGRICULTURE '13			699	https://link.springer.com/chapter/10.3920/978-90-8686-778-3_86	crop fields	Plants	y	n	n/a	n/a	n/a	n/a	n	n/a	n/a	n	n/a	n	n/a	y	700	FLIR	SC655	700
510	Rud et al	2013	PRECISION AGRICULTURE '13			721	https://www.researchgate.net/profile/Giuliano_Mosca/publication/259183204_Understanding_the_effects_Of_site-specific_fertilization_on_yield_and_protein_content_in_durum_wheat/links/566fd87e08ae4d9a4258b9e0/Understanding-the-effects-Of-site-specific-fertilization-on-yield-and-protein-content-in-durum-wheat.pdf#page=618	crops	Plants	y	n	n/a	n/a	n/a	n/a	n	n/a	n/a	y	722	y	722	y	722	FLIR	SC655	723
511	Guretzki & Papenbrock	2013	JOURNAL OF APPLIED BOTANY AND FOOD QUALITY	86		47	http://www.repo.uni-hannover.de/bitstream/handle/123456789/593/2302-9795-1-PB.pdf?sequence=1&isAllowed=y	plants	Plants	y	y	0.95	n	n/a	48	y	sensible value	48	y	48	y	48	y	48	FLIR	T360	48
513	Storchi et al	2013	I INTERNATIONAL WORKSHOP ON VINEYARD MECHANIZATION AND GRAPE AND WINE QUALITY			978	https://www.researchgate.net/publication/283891206_Comparative_assessment_of_different_sensing_technologies_for_mapping_the_vineyard	vegetation	Plants	n	n	n/a	n/a	n/a	n/a	n	n/a	n/a	n	n/a	n	n/a	n	n/a	FLIR	SC500 or A40M	73
515	Andre et al	2013	INTERNATIONAL JOURNAL OF WILDLAND FIRE	22	7	970	saved	forest fire	Plants	n	n	n/a	n/a	n/a	n/a	n	n/a	n/a	n	n/a	n	n/a	n	n/a	FLIR	Thermovision 550	971
518	Maia et al	2013	SCIENTIA AGRICOLA	70	6	377	http://www.scielo.br/pdf/sa/v70n6/01.pdf	horses	Agricultural Animals	y	y	0.95	Autio et al 2006	http://www.tandfonline.com/doi/pdf/10.1207/s15327604jaws0903_3	378	n	n/a	n/a	y	377	y	377	y	378	n	n	n/a
520	Neto et al	2013	BUFFALO BULLETIN	32	2	489	http://ibic.lib.ku.ac.th/e-bulletin/IBBUSI201302037.pdf	buffalo	Mammals	y	n	n/a	n/a	n/a	n/a	n	n/a	n/a	y	488	n	n/a	n	n/a	FLIR	Infra CAM	488
527	Ballester et al	2013	AGRICULTURAL AND FOREST METEOROLOGY	168		120	https://ac.els-cdn.com/S0168192312002572/1-s2.0-S0168192312002572-main.pdf?_tid=39139e06-caba-11e7-92f0-00000aab0f6b&acdnat=1510828863_125c6fef9659d803ab37780fa43d5b8d	Canopy temperature	Plants	y	y	0.98	Monteith & Unsworth 2008	http://denning.atmos.colostate.edu/readings/Monteith.and.Unsworth.4thEd.pdf	121	n	n/a	n/a	y	122	n	n/a	y	122	NEC	TH9100 WR	121
528	Al-Issawi et al	2013	JOURNAL OF AGRONOMY AND CROP SCIENCE	199	1	66	https://pearl.plymouth.ac.uk/bitstream/handle/10026.1/1263/Al-Issawi,%20El-Sarkassy%20&%20Fuller%20J%20Ag%20&%20Crop%20Scie%202013.pdf?sequence=2	wheat	Plants	y	n	n/a	n/a	n/a	n/a	n	n/a	n/a	y	67	n	n/a	n	n/a	Inframetrics	Inframetrics 760	67
529	Ellison et al	2013	ZOONOSES AND PUBLIC HEALTH	60	1	46	http://digitalcommons.unl.edu/cgi/viewcontent.cgi?article=2125&context=icwdm_usdanwrc	bats	Mammals	y	y	0.96	n	n/a	48	y	enviromental temp	48	y	48	y	48	y	48	FLIR	P640	48
530	Westermann et al	2013	JAVMA-JOURNAL OF THE AMERICAN VETERINARY MEDICAL ASSOCIATION	242	3	388	https://avmajournals.avma.org/doi/pdf/10.2460/javma.242.3.388	horses	Agricultural Animals	y	y	1	n	n/a	389	y	assumed to be ambient	389	y	389	y	389	y	389	Infratec	VarioCam	396
531	Celeste et al	2013	VETERINARY SURGERY	42	2	147	http://onlinelibrary.wiley.com/doi/10.1111/j.1532-950X.2012.00966.x/epdf	horses	Agricultural Animals	y	y	0.98	Cornelisse et al 2006	http://onlinelibrary.wiley.com/doi/10.2746/042516406776563251/epdf	149	n	n/a	n/a	y	148	y	148	y	149	FLIR	ThermaCAM SC2000	149
532	Lin et al	2013	COMPUTERS AND ELECTRONICS IN AGRICULTURE	91		94	https://ac.els-cdn.com/S016816991200289X/1-s2.0-S016816991200289X-main.pdf?_tid=810a4806-cac2-11e7-8801-00000aacb35d&acdnat=1510832419_657dbccebe21f921f8b594eec3da753d	eggs	Birds and Poultry	n	n	n/a	n/a	n/a	n/a	n	n/a	n/a	y	101	y	101	y	95	NEC	F30	101
534	Zhao et al	2013	POULTRY SCIENCE	92	2	295	https://academic.oup.com/ps/article/92/2/295/1537358	chickens	Birds and Poultry	y	y	0.98	n	n/a	296	y	enviromental temperature	296	y	296	y	296	y	296	FLIR	T400	296
536	Brown-Brandl et al	2013	BIOSYSTEMS ENGINEERING	114	3	327	https://ac.els-cdn.com/S1537511012002048/1-s2.0-S1537511012002048-main.pdf?_tid=b7ff94f4-cac4-11e7-af49-00000aab0f02&acdnat=1510833371_0490d018eb76dcac96bbf6dae43fe8db	pigs	Agricultural Animals	y	y	0.98	n	n/a	328	y	assumed to be ambient	329	y	329	n	n/a	n	n/a	FLIR	T400	328
540	Vainionpaa et al	2013	VETERINARY ANAESTHESIA AND ANALGESIA	40	2	142	https://onlinelibrary.wiley.com/doi/full/10.1111/j.1467-2995.2012.00768.x	dogs	Mammals	y	y	1	n	n/a	147	n	acknoledges issue of exclusion	147	y	143	n	n/a	n	n/a	FLIR	T425	144
541	Park et al	2013	FRONTIERS IN HUMAN NEUROSCIENCE	7		70	https://www.ncbi.nlm.nih.gov/pmc/articles/PMC3590493/pdf/fnhum-07-00070.pdf	human skin	Humans/Medical	y	n	n/a	n/a	n/a	n/a	n	n/a	n/a	y	3	y	3	y	3	NEC	Avio H2640	3
542	Samara et al	2013	EMIRATES JOURNAL OF FOOD AND AGRICULTURE	25	4	308	https://www.ejmanager.com/mnstemps/137/15500-44336-1-PB.pdf?t=1506262599	camels	Mammals	y	y	0.97	Monteith & Unsworth 1990	http://denning.atmos.colostate.edu/readings/Monteith.and.Unsworth.4thEd.pdf	309	y	assumed to be ambient	309	y	309	y	309	y	309	Thermoteknix	VisIR-Ti200	309
543	Zia et al	2013	JOURNAL OF AGRONOMY AND CROP SCIENCE	199	2	75	http://onlinelibrary.wiley.com/doi/10.1111/j.1439-037X.2012.00537.x/epdf	vegetation	Plants	y	n	n/a	n/a	n/a	n/a	n	n/a	n/a	y	76	y	76	y	77	Infratec	Variocam, Infra Tec	77
545	Uzunovic et al	2013	JOURNAL OF WOOD SCIENCE	59	2	160	https://link.springer.com/content/pdf/10.1007%2Fs10086-012-1306-2.pdf	wood	Plants	y	n	n/a	n/a	n/a	n/a	n	n/a	n/a	n	n/a	n	n/a	n	n/a	FLIR	ThermaCAM E65, FLIR	162
546	Figueiredo et al	2013	JOURNAL OF EQUINE VETERINARY SCIENCE	33	4	257	https://ac.els-cdn.com/S0737080612004339/1-s2.0-S0737080612004339-main.pdf?_tid=b7f99868-cacb-11e7-b575-00000aacb360&acdnat=1510836377_9052a5ebb8e38d84a8163bbf362d8458	horses	Agricultural Animals	y	n	n/a	n/a	n/a	n/a	n	n/a	n/a	n	n/a	n	n/a	y	258	FLIR	Thermacam i40	259
548	Ring et al	2013	JOURNAL OF MECHANICS IN MEDICINE AND BIOLOGY	13	2	1350045	https://scholar.google.com/scholar_lookup?author=E%20Ring&atitle=NEW%20STANDARDS%20FOR%20FEVER%20SCREENING%20WITH%20THERMAL%20IMAGING%20SYSTEMS&publication_year=2013&hl=en&journal=JOURNAL%20OF%20MECHANICS%20IN%20MEDICINE%20AND%20BIOLOGY&volume=13&issue=2&issn=0219-5194&doi=10.1142/S0219519413500450	skin	Humans/Medical	y	y	0.98	n	n/a	Fig 3	n	n/a	n/a	y	5	n	n/a	n	n/a	FLIR	SC640	5
552	Wang et al	2013	PLANT PHYSIOLOGY AND BIOCHEMISTRY	66		68	https://ac.els-cdn.com/S0981942813000521/1-s2.0-S0981942813000521-main.pdf?_tid=1c439494-cae6-11e7-8676-00000aacb35f&acdnat=1510847713_e6316b5ed42e789fcb21fa428e64b020	cucumber leaves	Plants	y	n	n/a	n/a	n/a	n/a	n	n/a	n/a	y	74	y	74	n	n/a	FLIR	SC 620	74
553	Ballester et al	2013	AGRICULTURAL WATER MANAGEMENT	122		1	https://ac.els-cdn.com/S0378377413000504/1-s2.0-S0378377413000504-main.pdf?_tid=e5ec037a-cae7-11e7-a527-00000aacb362&acdnat=1510848480_ca615b92086be134cd6c6a160793bde2	vegetation	Plants	y	y	0.98	Monteith & Unsworth 2008	http://denning.atmos.colostate.edu/readings/Monteith.and.Unsworth.4thEd.pdf	2	n	n/a	n/a	y	2	y	3	y	2	NEC	TH9100 WR	2
554	Martins et al	2013	RESEARCH IN VETERINARY SCIENCE	94	3	722	https://ac.els-cdn.com/S0034528812003244/1-s2.0-S0034528812003244-main.pdf?_tid=a45294f0-caed-11e7-9daf-00000aacb362&acdnat=1510850947_e49d0e6501d653dca1f08a7722d6a10a	sheep	Agricultural Animals	y	y	0.97	n	n/a	722	n	n/a	n/a	y	722	y	722	y	722	FLIR	Series-i	722
555	Hoffmann et al	2013	VETERINARY RESEARCH COMMUNICATIONS	37	2	91	https://link.springer.com/content/pdf/10.1007%2Fs11259-012-9549-3.pdf	cows	Agricultural Animals	y	y	0.985	Kastberger & Stachl 2003	https://link.springer.com/content/pdf/10.3758/BF03195520.pdf	92	y	assumed to be ambient	93	y	93	y	93	y	93	OPTRIS	PI 160	92
556	Zalewski et al	2013	CRYOBIOLOGY	66	3	295	https://ac.els-cdn.com/S0011224013001132/1-s2.0-S0011224013001132-main.pdf?_tid=dd48bf1e-caf2-11e7-9ad0-00000aacb35f&acdnat=1510853190_90ebff5740bee8fc6c5b3a4362e414f8	humans	Humans/Medical	y	n	n/a	n/a	n/a	n/a	n	n/a	n/a	y	296	y	296	y	296	FLIR	P640	296
558	Wiecek et al	2013	JOURNAL OF MECHANICS IN MEDICINE AND BIOLOGY	13	3	1350025	http://www.worldscientific.com/doi/pdf/10.1142/S0219519413500255	humans	Humans/Medical	y	n	n/a	n/a	n/a	n/a	n	n/a	n/a	n	n/a	n	n/a	n	n/a	FLIR	PM 595	3
559	Janka et al	2013	PLANT PHYSIOLOGY AND BIOCHEMISTRY	67		87	https://ac.els-cdn.com/S0981942813000831/1-s2.0-S0981942813000831-main.pdf?_tid=9023a63c-caf6-11e7-a3d4-00000aacb35e&acdnat=1510854779_c2dbf82de45175ac46c730968e86e12d	plants	Plants	y	y	0.95	Jones 2004	http://www.sciencedirect.com/science/article/pii/S0065229604410039	93	y	foil mirror	93	y	93	y	93	y	93	FLIR	A320	93
561	Yarnell et al	2013	PHYSIOLOGY & BEHAVIOR	118		32	https://ac.els-cdn.com/S0031938413001546/1-s2.0-S0031938413001546-main.pdf?_tid=bd63bca8-caf7-11e7-8e37-00000aacb362&acdnat=1510855284_75a8df6a51e524456febfc5e73ff36ed	horses	Agricultural Animals	y	n	n/a	n/a	n/a	n/a	n	n/a	n/a	n	n/a	n	n/a	y	35	FLIR	ThermaCAM SC640	35
562	Barbara et al	2013	FRONTIERS IN HUMAN NEUROSCIENCE	7		299	https://www.ncbi.nlm.nih.gov/pmc/articles/PMC3691510/pdf/fnhum-07-00299.pdf	human baby skin	Humans/Medical	y	n	n/a	n/a	n/a	n/a	n	n/a	n/a	y	2	y	2	n	n/a	FLIR	SC660	3
568	Dockweiler et al	2013	JOURNAL OF DAIRY SCIENCE	96	7	4340	https://ac.els-cdn.com/S0022030213003652/1-s2.0-S0022030213003652-main.pdf?_tid=578a886e-cafa-11e7-9fa5-00000aab0f27&acdnat=1510856402_3b90ab555b3ad5b9529453be48650d5a	cows	Agricultural Animals	y	n	n/a	n/a	n/a	n/a	y	assumed to be ambient	4344	y	4344	y	4344	n	n/a	FLIR	ThermaCAM S65	4344
569	Schmidt et al	2013	JOURNAL OF SWINE HEALTH AND PRODUCTION	21	4	203	https://www.aasv.org/shap/issues/v21n4/v21n4p203.pdf	pigs	Agricultural Animals	y	y	0.985	n	n/a	205	n	n/a	n/a	n	n/a	n	n/a	y	203	OPTRIS	PI	203
571	Ayres et al	2013	ERGONOMICS	56	7	1194	http://www.tandfonline.com/doi/pdf/10.1080/00140139.2013.789554?needAccess=true	human skin	Humans/Medical	y	n	n/a	n/a	n/a	n/a	n	n/a	n/a	y	1196	y	1196	y	1196	FLIR	320	1196
572	Edgar et al	2013	PHYSIOLOGY & BEHAVIOR	119		195	https://ac.els-cdn.com/S0031938413002060/1-s2.0-S0031938413002060-main.pdf?_tid=0deb904a-cb7c-11e7-ab6e-00000aacb361&acdnat=1510912113_8ea127ed05203feb75861c019eafed1b	chickens	Birds and Poultry	y	y	0.96	n	n/a	196	y	assumed to be ambient	196	y	196	n	n/a	y	196	FLIR	Thermacam E4	196
573	Melero et al	2013	BMC VETERINARY RESEARCH	9		149	https://bmcvetres.biomedcentral.com/track/pdf/10.1186/1746-6148-9-149?site=bmcvetres.biomedcentral.com	eagles	Birds and Poultry	y	n	n/a	n/a	n/a	n/a	n	n/a	n/a	n	n/a	n	n/a	n	n/a	FLIR	Thermacam E45	2
574	Piccione et al	2013	RESEARCH IN VETERINARY SCIENCE	95	1	261	https://ac.els-cdn.com/S0034528813000829/1-s2.0-S0034528813000829-main.pdf?_tid=7e5e7fee-cb7d-11e7-a3d4-00000aacb35e&acdnat=1510912731_3f8852e268a0388f00d74857c9a486c7	sheep	Agricultural Animals	y	y	0.93	n	n/a	262	y	sensible value	262	y	262	y	262	y	262	FLIR	ThermaCam P45	262
575	Fournet et al	2013	JOURNAL OF THERMAL BIOLOGY	38	6	339	https://ac.els-cdn.com/S0306456513000570/1-s2.0-S0306456513000570-main.pdf?_tid=53b69906-cb7e-11e7-a3ce-00000aab0f01&acdnat=1510913089_6c1dda0f72520b9249862d6b9875398f	human skin	Humans/Medical	y	y	0.98	Steketee 1973	http://iopscience.iop.org/article/10.1088/0031-9155/18/5/307/pdf	341	y	not given	341	y	341	y	341	y	341	FLIR	ThermaCam B2	340
577	Pramsohler & Neuner	2013	TREE PHYSIOLOGY	33	8	807	https://academic.oup.com/treephys/article/33/8/807/1664695	trees	Plants	y	n	n/a	n/a	n/a	n/a	n	n/a	n/a	y	809	n	n/a	n	n/a	FLIR	ThermaCAM S60	809
578	Soroko et al	2013	JOURNAL OF EQUINE VETERINARY SCIENCE	33	9	760	https://ac.els-cdn.com/S0737080612008738/1-s2.0-S0737080612008738-main.pdf?_tid=3d515992-cb80-11e7-969c-00000aacb35e&acdnat=1510913919_5c2759362f715eef437895e649579508	horses	Agricultural Animals	y	n	n/a	n/a	n/a	n/a	y	assumed to be ambient	761	y	761	n	n/a	y	761	InfraTec	Variocam HR	761
583	de Lima et al	2013	RESEARCH IN VETERINARY SCIENCE	95	2	802	https://ac.els-cdn.com/S0034528813001380/1-s2.0-S0034528813001380-main.pdf?_tid=d60d1ccc-cb83-11e7-9404-00000aab0f26&acdnat=1510915463_e7c95ba0ab27efe735c259730e7ec20a	rabbits	Mammals	y	n	n/a	n/a	n/a	n/a	n	n/a	n/a	y	803	y	803	y	803	Fluke	Ti25	803
589	Neto et al	2013	LIVESTOCK SCIENCE	157	1	358	https://ac.els-cdn.com/S1871141313002898/1-s2.0-S1871141313002898-main.pdf?_tid=f6d6c964-cb86-11e7-88d3-00000aacb35d&acdnat=1510916799_24c9f0149b4e63fccc00b7486acedd95	horses	Agricultural Animals	y	n	n/a	n/a	n/a	n/a	n	n/a	n/a	y	359	n	n/a	n	n/a	FLIR	InfraCAM	359
590	Okada et al	2013	JOURNAL OF VETERINARY MEDICAL SCIENCE	75	10	1349	https://www.jstage.jst.go.jp/article/jvms/75/10/75_13-0133/_pdf	cows	Agricultural Animals	y	n	n/a	n/a	n/a	n/a	n	n/a	n/a	y	1350	y	1350	y	1349	NEC	Thermo TVS-500EX	1149
591	de Diego et al	2013	VETERINARY JOURNAL	198	1	182	https://ac.els-cdn.com/S1090023313003365/1-s2.0-S1090023313003365-main.pdf?_tid=e1535d4a-cb8c-11e7-9080-00000aab0f6c&acdnat=1510919340_23f83a411550de639a4f19d071f2e9e6	sheep	Agricultural Animals	y	y	0.98	Girardin et al 1999	https://jamanetwork.com/journals/jamaophthalmology/fullarticle/1150416	183	n	n/a	n/a	y	183	n	n/a	y	183	FLIR	ThermaCAM E45	183
593	Zaproudina et al	2013	CLINICAL PHYSIOLOGY AND FUNCTIONAL IMAGING	33	6	409	http://onlinelibrary.wiley.com/doi/10.1111/cpf.12042/epdf	human skin	Humans/Medical	y	n	n/a	n/a	n/a	n/a	n	n/a	n/a	y	411	y	411	y	410	FLIR	A315	410
601	Kottmann et al	2013	JOURNAL OF AGRONOMY AND CROP SCIENCE	199	6	385	http://onlinelibrary.wiley.com/doi/10.1111/jac.12035/epdf	canopy temperature	Plants	y	y	0.98	n	n/a	386	n	n/a	n/a	y	387	y	387	y	387	FLIR	ThermaCAM PM675	386
602	Glynn et al	2013	JOURNAL OF VETERINARY PHARMACOLOGY AND THERAPEUTICS	36	6	550	http://onlinelibrary.wiley.com/doi/10.1111/jvp.12042/epdf	cattle eye	Agricultural Animals	y	n	n/a	n/a	n/a	n/a	n	n/a	n/a	n	n/a	n	n/a	n	n/a	FLIR	ThermaCam P65HS	553
607	Wang et al	2013	TREES-STRUCTURE AND FUNCTION	27	6	1755	https://link.springer.com/article/10.1007/s00468-013-0921-x	flowers and buds	Plants	y	n	n/a	n/a	n/a	n/a	n	n/a	n/a	n	n/a	n	n/a	n	n/a	Fluke	FlexCam / Ti50FT	1757
608	Cadena et al	2013	JOURNAL OF COMPARATIVE PHYSIOLOGY A-NEUROETHOLOGY SENSORY NEURAL AND BEHAVIORAL PHYSIOLOGY	199	12	1093	http://dr.library.brocku.ca/bitstream/handle/10464/6149/Cadena%20et%20al%20-%20Rattlesnake%20Respiratory%20Cooling.pdf?sequence=1	snakes	Reptiles and Amphibians	y	y	0.95	Tattersall et al 2004	https://brocku.ca/researchers/glenn_tattersall/PDFs/tattersall%20thermogenesis%20in%20snakes.pdf	1096	y	assumed to be ambient	1096	y	1096	y	1094	n	n/a	Vista/FLIR	Mikron &515 or FLIR SC640	1097
610	Morales & Urrestar	2013	HORTSCIENCE	48	12	1508	http://hortsci.ashspublications.org/content/48/12/1508.full	plants	Plants	y	n	n/a	n/a	n/a	n/a	n	n/a	n/a	n	n/a	n	n/a	n	n/a	Fluke	Ti32	1509
611	Woods	2013	FUNCTIONAL ECOLOGY	27	6	1322	https://besjournals.onlinelibrary.wiley.com/doi/full/10.1111/1365-2435.12124	moth egg and larve and leaves	insects	y	y	0.97	measured	supp info	1325	n	n/a	n/a	y	1324	y	1324	n	n/a	FLIR	ThermaVision SC4000 FLIR	1324
612	Gillette et al	2013	JOURNAL OF FISH AND WILDLIFE MANAGEMENT	4	2	386	http://www.fwspubs.org/doi/pdf/10.3996/032013-JFWM-025	grouse leks	Birds and Poultry	n	n	n/a	n/a	n/a	n/a	n	n/a	n/a	n	n/a	n	n/a	n	388	FLIR	SC6700 or RS6700	388
613	Kammersgaard et al et al	2013	ANIMAL	7	12	2026	https://www.cambridge.org/core/services/aop-cambridge-core/content/view/846B427F245C80FB47E4BA71E11C0B66/S1751731113001778a.pdf/infrared_thermography_a_noninvasive_tool_to_evaluate_thermal_status_of_neonatal_pigs_based_on_surface_temperature.pdf	pigs	Agricultural Animals	y	y	0.98	Steketee 1973	http://iopscience.iop.org/article/10.1088/0031-9155/18/5/307/pdf	2027	y	sensible number	2027	y	2027	y	2027	y	2028	Testo	T880-3	2027
614	Bartolome et al	2013	ANIMAL	7	12	2044	https://www.cambridge.org/core/services/aop-cambridge-core/content/view/4B7DDD9170A778228AC8170736AE2FBE/S1751731113001626a.pdf/using_eye_temperature_and_heart_rate_for_stress_assessment_in_young_horses_competing_in_jumping_competitions_and_its_possible_influence_on_sport_performance.pdf	horses	Agricultural Animals	y	n	n/a	n/a	n/a	n/a	n	n/a	n/a	y	2046	y	2046	y	2046	FLIR	Thermacam i70	2046
627	Blas et al	2014	VII CONGRESO IBERICO DE AGROINGENIERIA Y CIENCIAS HORTICOLAS: INNOVAR Y PRODUCIR PARA EL FUTURO. INNOVATING AND PRODUCING FOR THE FUTURE			1499	saved	chickens	Birds and Poultry	y	n	n/a	n/a	n/a	n/a	y	floor image	1500	y	1500	n	n/a	y	1500	FLIR	T425	1501
628	Hall et al	2014	JOURNAL OF VETERINARY BEHAVIOR-CLINICAL APPLICATIONS AND RESEARCH	9	1	22	https://ac.els-cdn.com/S1558787813001986/1-s2.0-S1558787813001986-main.pdf?_tid=565b86dc-ceb0-11e7-8dec-00000aab0f26&acdnat=1511264422_b7e0f101de6e250e516f9799e3af8143	horses	Agricultural Animals	y	n	n/a	n/a	n/a	n/a	n	n/a	n/a	n	n/a	n	n/a	y	24	Wuhan Guide	MobIR M8	24
631	Metzener et al	2014	VETERINARY JOURNAL	199	1	57	https://ac.els-cdn.com/S1090023313005443/1-s2.0-S1090023313005443-main.pdf?_tid=8969a9cc-ceb1-11e7-a065-00000aacb362&acdnat=1511264937_6454f1d7ea78219cafb226ae9ea9145f	cows	Agricultural Animals	y	y	0.96	n	n/a	n/a	n	n/a	n/a	y	58	y	58	y	58	FLIR	B20 HSV	58
632	Sagaidachnyi et al	2014	SARATOV FALL MEETING 2013: OPTICAL TECHNOLOGIES IN BIOPHYSICS AND MEDICINE XV; AND LASER PHYSICS AND PHOTONICS XV	9031		903108	https://scholar.google.co.uk/scholar?hl=en&as_sdt=0%2C5&q=Skin+blood+flow+as+the+first+time+derivative+of+the+temperature%3A+spectral+approach+to+the+blood+flow+estimation+in+hands&btnG=	human skin	Humans/Medical	y	n	n/a	n/a	n/a	n/a	n	n/a	n/a	y	2	n	n/a	n	n/a	FLIR	ThermaCAM SC3000, FLIR	2
637	Bandeira et al	2014	REVISTA BRASILEIRA DE MEDICINA DO ESPORTE	20	1	59	http://www.scielo.br/pdf/rbme/v20n1/1517-8692-rbme-20-01-00059.pdf	humans	Humans/Medical	y	n	n/a	n/a	n/a	n/a	n	n/a	n/a	y	61	y	61	n	n/a	FLIR	A325	60
642	McCoard et al	2014	ANIMAL PRODUCTION SCIENCE	54	9	1497	https://scholar.google.com/scholar_lookup?author=S%20McCoard&atitle=Infrared%20thermal%20imaging%20as%20a%20method%20to%20study%20thermogenesis%20in%20the%20neonatal%20lamb&publication_year=2014&hl=en&journal=ANIMAL%20PRODUCTION%20SCIENCE&volume=54&issue=9&pages=1497-1501&issn=1836-0939&doi=10.1071/AN14301	sheep	Agricultural Animals	y	n	n/a	n/a	n/a	n/a	n	n/a	n/a	y	1498	n	n/a	n	n/a	FLIR	ThermaCam S60	1498
643	DiGiacomo et al	2014	ANIMAL PRODUCTION SCIENCE	54	10	1877	https://scholar.google.com/scholar_lookup?author=K%20DiGiacomo&atitle=Thermoregulatory%20differences%20in%20lactating%20dairy%20cattle%20classed%20as%20efficient%20or%20inefficient%20based%20on%20residual%20feed%20intake&publication_year=2014&hl=en&journal=ANIMAL%20PRODUCTION%20SCIENCE&volume=54&issue=10&pages=1877-1881&issn=1836-0939&doi=10.1071/AN14311	cows	Agricultural Animals	y	y	0.95	n	n/a	1878	n	n/a	n/a	y	1878	y	1878	n	n/a	FLIR	T600	1878
649	Rogatkin et al	2014	BIOPHOTONICS: PHOTONIC SOLUTIONS FOR BETTER HEALTH CARE IV	9129		UNSP 912922	http://medphyslab.ru/images/publications/stat_spie_9129-22_e.pdf	skin	Humans/Medical	y	n	n/a	n/a	n/a	n/a	n	n/a	n/a	y	3	n	n/a	n	n/a	IRTIS	2000ME	2
650	Ballester et al	2014	VII INTERNATIONAL SYMPOSIUM ON IRRIGATION OF HORTICULTURAL CROPS	1038		51	https://scholar.google.co.uk/scholar?hl=en&as_sdt=0%2C5&q=Are+Sap+Flow+and+Canopy+Temperature+Measurements+Useful+Alternatives+to+Stem+Water+Potential+for+Detecting+Plant+Water+Stress+in+Citrus+Trees%3F&btnG=	vegetation	Plants	y	y	0.98	Monteith & Unsworth 2008	http://denning.atmos.colostate.edu/readings/Monteith.and.Unsworth.4thEd.pdf	53	n	n/a	n/a	n	n/a	n	n/a	y	53	NEC	TH9100 WR	53
652	Cosic et al	2014	VII INTERNATIONAL SYMPOSIUM ON IRRIGATION OF HORTICULTURAL CROPS	1038		647	saved	peppers	Plants	y	n	n/a	n/a	n/a	n/a	n	n/a	n/a	y	3	n	n/a	n	n/a	FLIR	T335	2
653	Kishimoto et al	2014	AOB PLANTS	6		plu044	https://academic.oup.com/aobpla/article/doi/10.1093/aobpla/plu044/2842728	vegetaion	Plants	y	n	n/a	n/a	n/a	n/a	n	n/a	n/a	y		n	n/a	n	n/a	FLIR	TVS-600	section 'Infra-red themography'
655	Maes et al	2014	FUNCTIONAL PLANT BIOLOGY	41	12	1207	https://scholar.google.com/scholar_lookup?author=W%20Maes&atitle=Early%20detection%20of%20Psa%20infection%20in%20kiwifruit%20by%20means%20of%20infrared%20thermography%20at%20leaf%20and%20orchard%20scale&publication_year=2014&hl=en&journal=FUNCTIONAL%20PLANT%20BIOLOGY&volume=41&issue=12&pages=1207-1220&issn=1445-4408&doi=10.1071/FP14021	vegetaion	Plants	y	y	0.98	Meas & Steppe 2012	https://watermark.silverchair.com/ers165.pdf?token=AQECAHi208BE49Ooan9kkhW_Ercy7Dm3ZL_9Cf3qfKAc485ysgAAAb8wggG7BgkqhkiG9w0BBwagggGsMIIBqAIBADCCAaEGCSqGSIb3DQEHATAeBglghkgBZQMEAS4wEQQMWOCkFynVQDf1hJtlAgEQgIIBcobysIR8YASR2XZqr4xQ1kIYbB9I89g3f4LOLep_GGapFG44ABvAAiuQ_9oUmPj_Mlzxp5xC43_ZNUqU6MC084Sm84g4UnAcGKensUvGRAt2g0OC6Zazku3xzCvPIUC9aYFSS-ppwYO_Yhbb79HA78yCYxAmu62eToACqiODw6ib8RQiFaMgoJ0iIMPrYrot…	C	y	Foil mirror	C	n	n/a	n	n/a	y	C	FLIR	SC305	C
657	Milosevic et al	2014	EXCLI JOURNAL	13		1204	https://www.ncbi.nlm.nih.gov/pmc/articles/PMC4464488/pdf/EXCLI-13-1204.pdf	human skin	Humans/Medical	y	n	n/a	n/a	n/a	n/a	n	n/a	n/a	y	1206	n	n/a	n	n/a	InfraTec	VarioScan 3021 ST	1206
662	Poblete-Echeverria et al	2014	VII INTERNATIONAL SYMPOSIUM ON OLIVE GROWING	1057		399	https://scholar.google.co.uk/scholar?hl=en&as_sdt=0%2C5&q=Use+of+Infrared+Thermography+on+Canopies+as+Indicator+of+Water+Stress+in+%27Arbequina%27+Olive+Orchards&btnG=	olive trees	Plants	y	n	n/a	n/a	n/a	n/a	n	n/a	n/a	n	n/a	n	n/a	n	n/a	FLIR	i40	400
667	Guretzki & Papenbrock	2014	JOURNAL OF AGRONOMY AND CROP SCIENCE	200	1	24	http://onlinelibrary.wiley.com/doi/10.1111/jac.12043/epdf	vegetation	Plants	y	y	0.95	n	n/a	26	y	something sensible, also ambient	26	y	26	y	26	y	26	FLIR	T360	26
669	Sagaidachnyi et al	2014	PHYSIOLOGICAL MEASUREMENT	35	2	153	http://iopscience.iop.org/article/10.1088/0967-3334/35/2/153/meta	fingers	Humans/Medical	y	n	n/a	n/a	n/a	n/a	n	n/a	n/a	y	155	n	n/a	n	n/a	FLIR	ThermaCAM SC3000, FLIR	155
670	Fernandes et al	2014	PHYSIOLOGICAL MEASUREMENT	35	2	189	http://oa.upm.es/29408/3/INVE_MEM_2013_170186.pdf	human skin	Humans/Medical	y	y	0.98	Lahiri et al. 2012	https://www.sciencedirect.com/science/article/pii/S1350449512000308	194	y	something sensible	194	y	193	y	193	y	194	FLIR	T420	194
671	Fraser et al	2014	AMERICAN JOURNAL OF VETERINARY RESEARCH	75	2	200	https://avmajournals.avma.org/doi/abs/10.2460/ajvr.75.2.200	cow calves	Agricultural Animals	y	n	n/a	n/a	n/a	n/a	n	n/a	n/a	y	202	y	202	y	202	FLIR	Thermacam S65 FLIR	206
672	Alejandro et al	2014	LIVESTOCK SCIENCE	160		178	https://ac.els-cdn.com/S1871141313005222/1-s2.0-S1871141313005222-main.pdf?_tid=732fb276-cf6c-11e7-aab4-00000aab0f02&acdnat=1511345224_d0a076c9103293f192ab8f684b3f4151	goats	Agricultural Animals	y	n	n/a	n/a	n/a	n/a	n	n/a	n/a	y	180	y	180	n	n/a	Fluke	Ti50FT Flexcam	180
673	Church et al	2014	RESEARCH IN VETERINARY SCIENCE	96	1	220	https://ac.els-cdn.com/S0034528813003664/1-s2.0-S0034528813003664-main.pdf?_tid=34e6e2d6-cf6d-11e7-bf10-00000aab0f6b&acdnat=1511345549_8ff8293b6af5e3dc6cf66221998b565c	cattle	Agricultural Animals	y	y	0.95	Stelletta et al 2012	https://www.intechopen.com/books/infrared-thermography/thermographic-applications-in-veterinary-medicine	221	y	assumed to be ambient	221	y	221	y	221	y	222	FLIR	E60 & I40	221
676	Alsaaod et al	2014	VETERINARY JOURNAL	199	2	281	https://www.sciencedirect.com/science/article/pii/S1090023313006205	cows	Agricultural Animals	y	y	0.95	Gloster et al 2011	https://bmcvetres.biomedcentral.com/track/pdf/10.1186/1746-6148-7-73?site=bmcvetres.biomedcentral.com	282	y	assumed to be ambient	282	y	282	n	n/a	y	282	Fluke	IR Ti25	282
677	Samara et al	2014	JOURNAL OF DAIRY RESEARCH	81	1	38	https://www.cambridge.org/core/services/aop-cambridge-core/content/view/25C2F0B0AB9BC1706154CAA5C4FE1A87/S0022029913000605a.pdf/div-class-title-feasibility-of-utilising-an-infrared-thermographic-technique-for-early-detection-of-subclinical-mastitis-in-dairy-camels-span-class-italic-camelus-dromedarius-span-div.pdf	camels	Mammals	y	n	n/a	n/a	n/a	n/a	y	assumed to be ambient	39	y	39	y	39	y	39	Thermoteknix	VisIR	39
679	Pou et al	2014	AGRICULTURAL WATER MANAGEMENT	134		60	https://ac.els-cdn.com/S0378377413003259/1-s2.0-S0378377413003259-main.pdf?_tid=c67d62c2-cf83-11e7-aa36-00000aacb35e&acdnat=1511355234_a9d45bf412049b42637ec6313ca439df	vegetation and berries	Plants	y	y	0.96	Jones 2004 & estimated with berries	http://www.sciencedirect.com/science/article/pii/S0065229604410039	62	y	foil mirror	62	y	62	y	62	y	62	FLIR	ThermaCam P640, FLIR	62
680	Castro-Costa	2014	JOURNAL OF DAIRY SCIENCE	97	3	1377	https://ac.els-cdn.com/S0022030214000150/1-s2.0-S0022030214000150-main.pdf?_tid=e246d55a-cf84-11e7-9273-00000aab0f01&acdnat=1511355710_d1bc17cddf3676166f6569d39b2d43b0	sheep	Agricultural Animals	y	y	0.98	Hovinen et al 2008	https://helda.helsinki.fi/bitstream/handle/10138/27389/Siivonen_et_al_2011.pdf?sequence=2	1378	y	assumed to be ambient	1378	y	1378	n	n/a	y	1378	Irisys	IRI 4010	1378
683	Yanmaz & Okumus	2014	ISRAEL JOURNAL OF VETERINARY MEDICINE	69	1	20	http://www.ijvm.org.il/sites/default/files/yanmaz.pdf	horses	Agricultural Animals	y	y	0.95	n	n/a	Fig 1.	n	n/a	n/a	y	21	y	21	y	21	Infrared Solutions	FlexCam S Infrared solutions	21
684	Nunez-Villegas et al	2014	JOURNAL OF EXPERIMENTAL BIOLOGY	217	6	997	http://jeb.biologists.org/content/jexbio/217/6/997.full.pdf	rodents	Mammals	y	y	0.98	n	n/a	1001	y	assumed to be ambient	1001	y	1001	n	n/a	y	1001	FLIR	i40	1001
685	Caldara et al	2014	ASIAN-AUSTRALASIAN JOURNAL OF ANIMAL SCIENCES	27	3	431	https://www.ncbi.nlm.nih.gov/pmc/articles/PMC4093255/pdf/ajas-27-3-431-17.pdf	pigs	Agricultural Animals	y	y	0.96 (pig) 0.94 (plastic)	n	n/a	432	n	n/a	n/a	y	432	y	432	n	n/a	Testo	Termovisor Testo 876-1	432
687	Ninomiya et al	2014	VETERINARY OPHTHALMOLOGY	17	2	100	http://onlinelibrary.wiley.com/doi/10.1111/vop.12048/epdf	doliphins	Mammals	y	n	n/a	n/a	n/a	n/a	y	assumed to be ambient	101	y	101	n	n/a	n	n/a	NEC	InfRec	101
690	Amezcua et al	2014	CANADIAN VETERINARY JOURNAL-REVUE VETERINAIRE CANADIENNE	55	3	268	https://www.ncbi.nlm.nih.gov/pmc/articles/PMC3923485/pdf/cvj_03_268.pdf	pigs	Agricultural Animals	y	n	n/a	n/a	n/a	n/a	n	n/a	n/a	n	n/a	n	n/a	y	268	FLIR	T300	268
694	Smdiqui et al	2014	ACTA BOTANICA CROATICA	73	1	149	http://hrcak.srce.hr/119004	vegetation	Plants	y	n	n/a	n/a	n/a	n/a	n	n/a	n/a	y	151	y	151	n	n/a	FLIR	SC 620	151
695	Dietrich & Korner	2014	ALPINE BOTANY	124	1	27	https://link.springer.com/article/10.1007/s00035-014-0123-1	flowers	Plants	y	y	0.98	Rubio et al 1997	https://ac.els-cdn.com/S003442579600123X/1-s2.0-S003442579600123X-main.pdf?_tid=d1a68d78-ba56-11e7-89c2-00000aab0f6c&acdnat=1509026950_b64678d38afd4aab388313030e943c79	29	y	assumed to be ambient	29	y	29	y	29	n	n/a	InfraTec	VarioCAM	29
696	Hill et al	2014	JOURNAL OF EXPERIMENTAL BIOLOGY	217	8	1326	http://jeb.biologists.org/content/jexbio/217/8/1326.full.pdf	finches	Birds and Poultry	y	y	0.98	Hammel 1956	http://www.jstor.org/stable/1376737?seq=1#page_scan_tab_contents	1331	y	assumed to be ambient	1331	y	1331	y	1331	y	1330	FLIR	ThermaCam E300	1330
700	Talukder et al	2014	THERIOGENOLOGY	81	7	925	https://ac.els-cdn.com/S0093691X14000296/1-s2.0-S0093691X14000296-main.pdf?_tid=d6a3fec0-cf99-11e7-b793-00000aacb35d&acdnat=1511364709_8455af3ee784957834854a8e72ccef18	cows	Agricultural Animals	y	y	0.98	n	n/a	927	y	assumed to be ambient	927	y	927	y	927	y	927	FLIR	620	927
704	Gerasimova et al	2014	FRONTIERS IN PHYSIOLOGY	5		176	https://www.frontiersin.org/articles/10.3389/fphys.2014.00176/full	Humans	Humans/Medical	y	n	n/a	n/a	n/a	n/a	n	n/a	n/a	y	4	n	n/a	y	4	FLIR	InSb photovoltaic detector	4
705	Marins et al	2014	JOURNAL OF THERMAL BIOLOGY	42		1	https://ac.els-cdn.com/S0306456514000370/1-s2.0-S0306456514000370-main.pdf?_tid=0802f114-cf9b-11e7-9346-00000aacb360&acdnat=1511365222_94b227c1b9e655092a3238852df8a0ef	human skin	Humans/Medical	y	y	0.98	Ring & Ammer 2013	http://iopscience.iop.org/article/10.1088/0967-3334/33/3/R33/pdf	2	n	n/a	n/a	y	2	y	2	y	2	Fluke	TIR-25	2
706	Sannolo et al	2014	JOURNAL OF ZOOLOGY	293	2	71	http://onlinelibrary.wiley.com/doi/10.1111/jzo.12121/epdf	reptiles	Reptiles and Amphibians	y	n	n/a	n/a	n/a	n/a	n	n/a	n/a	y	72	n	n/a	y	72	FLIR	B-200	73
707	Keramidas et al	2014	HIGH ALTITUDE MEDICINE & BIOLOGY	15	2	183	https://www.ncbi.nlm.nih.gov/pmc/articles/PMC4074747/pdf/ham.2013.1131.pdf	hands	Humans/Medical	y	n	n/a	n/a	n/a	n/a	n	n/a	n/a	y	184	y	184	y	185	FLIR	T365	185
713	Oikonomou et al	2014	JOURNAL OF DAIRY SCIENCE	97	7	4208	https://ac.els-cdn.com/S0022030214003592/1-s2.0-S0022030214003592-main.pdf?_tid=49fb5f06-cfa1-11e7-a176-00000aab0f6b&acdnat=1511367910_229cb64165cd722ef04f8ac0a15afa92	cow feet	Agricultural Animals	y	y	0.95	n	n/a	4210	y	sensible value	fig 1	y	4210	y	Fig 1	y	4210	FLIR	E30BOX	4210
716	Tomiyama et al	2014	JOURNAL OF PLANT RESEARCH	127	4	553	https://link.springer.com/content/pdf/10.1007%2Fs10265-014-0636-0.pdf	vegetation	Plants	y	n	n/a	n/a	n/a	n/a	n	n/a	n/a	y	554	y	554	n	n/a	NEC	TVS-500EX	555
721	Bellvert et al	2014	PRECISION AGRICULTURE	15	4	361	https://link.springer.com/content/pdf/10.1007%2Fs11119-013-9334-5.pdf	canopy vegetation	Plants	y	n	n/a	n/a	n/a	n/a	n	n/a	n/a	y	363	n	n/a	y	364	Thermoteknix	Miricle 307K	364
724	Ioannou et al	2014	FRONTIERS IN PSYCHOLOGY	5		845	https://www.ncbi.nlm.nih.gov/pmc/articles/PMC4120854/pdf/fpsyg-05-00845.pdf	human skin	Humans/Medical	y	n	n/a	n/a	n/a	n/a	n	n/a	n/a	y	4	y	4	y	3	Thermopro	TP8	3
728	Henin et al	2014	EUROPEAN JOURNAL OF WOOD AND WOOD PRODUCTS	72	5	623	https://link.springer.com/content/pdf/10.1007%2Fs00107-014-0826-4.pdf	wood	Plants	y	y	0.816 and 0.924	n	n/a	626	n	n/a	n/a	y	626	n	n/a	n	n/a	InfraTec	VarioCam	626
731	Siewert et al	2014	PFERDEHEILKUNDE	30	5	521	saved	horses	Agricultural Animals	y	y	0.97	Hassan et al 2008			y	assumed to be ambient	523	y	523	y	523	n	n/a	InfraTec	VarioCam	523
732	Paim et al	2014	SCIENTIA AGRICOLA	71	5	356	http://www.scielo.br/pdf/sa/v71n5/02.pdf	sheep	Agricultural Animals	y	y	0.95	n	n/a	357	n	n/a	n/a	y	357	y	357	y	357	n	n	n/a
734	Menzel et al	2014	BMC VETERINARY RESEARCH	10		199	https://bmcvetres.biomedcentral.com/track/pdf/10.1186/s12917-014-0199-2?site=bmcvetres.biomedcentral.com	pigs	Agricultural Animals	y	y	0.96	Bronzino & Diakides 2008	https://www.crcpress.com/Medical-Infrared-Imaging/Diakides-Bronzino/p/book/9780849390272	10	y	assumed to be ambient	11	y	10	n	n/a	y	10	InfraTec	VarioCAM HR	10
735	Kuprian et al	2014	ENVIRONMENTAL AND EXPERIMENTAL BOTANY	106		4	https://ac.els-cdn.com/S0098847214000173/1-s2.0-S0098847214000173-main.pdf?_tid=45931314-d03c-11e7-af4f-00000aab0f27&acdnat=1511434474_0d38a3a566943ff53d547d89bf431f76	plants	Plants	y	n	n/a	n/a	n/a	n/a	n	n/a	n/a	y	5	n	n/a	n	n/a	FLIR	ThermaCam S60 FLIR	6
737	Grossbard et al	2014	VETERINARY SURGERY	43	7	869	http://onlinelibrary.wiley.com/doi/10.1111/j.1532-950X.2014.12239.x/epdf	dog	Mammals	y	n	n/a	n/a	n/a	n/a	n	n/a	n/a	y	870	n	n/a	y	871	meditherm Inc	Med 2000 IRIS	871
738	Krywicki et al	2014	INTERNATIONAL JOURNAL OF PSYCHOPHYSIOLOGY	94	1	25	https://ac.els-cdn.com/S0167876014001482/1-s2.0-S0167876014001482-main.pdf?_tid=53a6630e-d03f-11e7-8968-00000aacb360&acdnat=1511435795_c0d70bfdb23822eaf888208642cc5750	skin pores	Humans/Medical	n	n	n/a	n/a	n/a	n/a	y	assumed to be ambient	26	y	26	y	26	y	26	FLIR	SC5600 & L-3 Communications Cincinnati Electronics	26
739	Virlet et al	2014	JOURNAL OF EXPERIMENTAL BOTANY	65	18	5429	https://academic.oup.com/jxb/article/65/18/5429/2885102	crop canopy	Plants	y	y	1 (unity)	n	n/a	5432	n	n/a	n/a	y	5432	y	5432	y	5432	FLIR	B20HSV	5432
741	Gomez-Bellot et al	2014	HORTSCIENCE	49	10	1292	http://hortsci.ashspublications.org/content/49/10/1292.full.pdf+html	vegetation	Plants	y	y	0.96	Grant et al 2006 ; Leinonen et al 2006	http://onlinelibrary.wiley.com/doi/10.1111/j.1399-3054.2006.00686.x/epdf : http://onlinelibrary.wiley.com/doi/10.1111/j.1365-3040.2006.01528.x/epdf	1294	y	foil mirror	1294	y	1293	y	1293	y	1294	FLIR	E50	1294
742	Yarnell et al	2014	JOURNAL OF THERMAL BIOLOGY	45		110	https://ac.els-cdn.com/S0306456514001193/1-s2.0-S0306456514001193-main.pdf?_tid=58bd48e0-d052-11e7-91ea-00000aab0f6c&acdnat=1511443963_fcb48bf59165fc2712047ee74608d408	horses	Agricultural Animals	y	y	0.97	n	n/a	112	n	n/a	n/a	y	112	n	n/a	y	112	FLIR	B335	112
743	James et al	2014	JOURNAL OF THERMAL BIOLOGY	45		141	https://ac.els-cdn.com/S0306456514001260/1-s2.0-S0306456514001260-main.pdf?_tid=ff9472c4-d052-11e7-95a9-00000aab0f6c&acdnat=1511444235_e2fc72c2b795ea26d032357b57fe696c	electrical tape and skin	Humans/Medical	y	y	0.95 (tape), 0.98 (human)	Steketee 1973	http://iopscience.iop.org/article/10.1088/0031-9155/18/5/307/pdf	143	y	not clarified	143	y	143	y	143	y	143	FLIR	e40BX	143
744	Simoes et al	2014	THERIOGENOLOGY	82	8	1080	https://ac.els-cdn.com/S0093691X14003586/1-s2.0-S0093691X14003586-main.pdf?_tid=c9a8054e-d053-11e7-9ccc-00000aacb35d&acdnat=1511444574_8345fe3e2076feb4e3219334947c9348	pigs	Agricultural Animals	y	n	n/a	n/a	n/a	n/a	n	n/a	n/a	y	1081	n	n/a	y	1081	Fluke	TiR 9	1081
745	Gonzalez-Dugo	2014	AGRICULTURAL AND FOREST METEOROLOGY	198		94	https://ac.els-cdn.com/S0168192314001841/1-s2.0-S0168192314001841-main.pdf?_tid=ee7ef502-d054-11e7-9f86-00000aab0f01&acdnat=1511445065_c42b351a2225df32418a77faf744f615	vegetation	Plants	y	n	n/a	n/a	n/a	n/a	n	n/a	n/a	y	96	y	96	y	96	Thermoteknix	Miricle 307	96
746	George et al	2014	JOURNAL OF ANIMAL SCIENCE	92	11	4949	https://scholar.google.com/scholar_lookup?author=W%20George&atitle=Relationship%20among%20eye%20and%20muzzle%20temperatures%20measured%20using%20digital%20infrared%20thermal%20imaging%20and%20vaginal%20and%20rectal%20temperatures%20in%20hair%20sheep%20and%20cattle&publication_year=2014&hl=en&journal=JOURNAL%20OF%20ANIMAL%20SCIENCE&volume=92&issue=11&pages=4949-4955&issn=0021-8812&doi=10.2527/jas2…	cows	Agricultural Animals	y	n	n/a	n/a	n/a	n/a	y	assumed to be ambient	4950	y	4950	y	4950	y	4950	FLIR	P65HS	4950
747	Koprowski et al	2014	COMPUTERS IN BIOLOGY AND MEDICINE	54		129	https://ac.els-cdn.com/S0010482514002315/1-s2.0-S0010482514002315-main.pdf?_tid=6dd60108-d076-11e7-9de0-00000aacb360&acdnat=1511459452_f76a7c92a3d7205c3b5cc39602a139ba	human skin	Humans/Medical	y	n	n/a	n/a	n/a	n/a	n	n/a	n/a	y	130	y	130	n	n/a	FLIR	i7	130
750	Soerensen et al	2014	COMPUTERS AND ELECTRONICS IN AGRICULTURE	109		52	https://ac.els-cdn.com/S0168169914002178/1-s2.0-S0168169914002178-main.pdf?_tid=79748290-d077-11e7-8f80-00000aacb361&acdnat=1511459901_24bc96683a89152204144fc0f707bcc2	pigs	Agricultural Animals	y	y	0.94-0.97	measured	n/a	throughout	y	foil mirror	55	y	55	y	55	y	55	FLIR	SC660	54
754	Berdgugo et al	2014	PLANT PATHOLOGY	63	6	1344	http://onlinelibrary.wiley.com/doi/10.1111/ppa.12219/epdf	cucumber crops	Plants	y	n	n/a	n/a	n/a	n/a	n	n/a	n/a	y	1345	y	1345	n	n/a	Jenoptik	Varisoscan 3201	1346
755	Lathlean	2014	JOURNAL OF THERMAL BIOLOGY	46		16	https://ac.els-cdn.com/S0306456514001326/1-s2.0-S0306456514001326-main.pdf?_tid=bf8c7810-d0fd-11e7-b1dc-00000aab0f02&acdnat=1511517572_2c09c9786b95b4fce5ecfce4ccde7e8e	limpets and the rock they are on?	Other	y	y	0.95	n	n/a	18	n	shades beforehand	18	y	18	n	n/a	y	18	FLIR	S65	18
756	Conn et al	2014	METHODS IN ECOLOGY AND EVOLUTION	5	12	1280	http://onlinelibrary.wiley.com/doi/10.1111/2041-210X.12127/epdf	seals	Mammals	n	n	n/a	n/a	n/a	n/a	n	n/a	n/a	n	n/a	n	n/a	y	1287	FLIR	SC645	1287
759	Jeong et al	2014	PAKISTAN JOURNAL OF BOTANY	46	6	2015	http://www.pakbs.org/pjbot/PDFs/46(6)/11.pdf	rice plants	Plants	y	n	n/a	n/a	n/a	n/a	n	n/a	n/a	y	2016	y	2016	n	n/a	FLIR	SC620	2016
763	Park et al	2014	JOURNAL OF ETHNOPHARMACOLOGY	158		25	https://ac.els-cdn.com/S0378874114006825/1-s2.0-S0378874114006825-main.pdf?_tid=b689c650-d102-11e7-974d-00000aab0f6b&acdnat=1511519704_f8e1ebde7333cb1aaa85785d5ef97d9f	human skin	Humans/Medical	y	n	n/a	n/a	n/a	n/a	n	n/a	n/a	y	26	n	n/a	n	n/a	Dongseo Co.	IRCT 510	26
764	Nobrega et al	2014	ACTA SCIENTIAE VETERINARIAE	42		1246	https://www.cabdirect.org/cabdirect/FullTextPDF/2015/20153070697.pdf	horses	Agricultural Animals	y	n	n/a	n/a	n/a	n/a	n	n/a	n/a	n	n/a	n	n/a	y	2	FLIR	T400	2
765	Feldstein et al	2015	6TH INTERNATIONAL CONFERENCE ON APPLIED HUMAN FACTORS AND ERGONOMICS (AHFE 2015) AND THE AFFILIATED CONFERENCES, AHFE 2015	3		829	https://ac.els-cdn.com/S235197891500339X/1-s2.0-S235197891500339X-main.pdf?_tid=4a15a388-d105-11e7-9dc5-00000aacb35e&acdnat=1511520810_75a47c7331f27ae5688626544f5b3213	humans	Humans/Medical	n	n	n/a	n/a	n/a	n/a	n	n/a	n/a	n	n/a	n	n/a	y	fig 8	Audi	PIR car camera	830
766	Flores-Olivares et al	2015	6TH INTERNATIONAL CONFERENCE ON APPLIED HUMAN FACTORS AND ERGONOMICS (AHFE 2015) AND THE AFFILIATED CONFERENCES, AHFE 2015	3		4415	https://ac.els-cdn.com/S2351978915004436/1-s2.0-S2351978915004436-main.pdf?_tid=32e28dba-d106-11e7-9d08-00000aab0f6c&acdnat=1511521201_15fc7c0c3eb52035f3970badf0d009ae	humans	Humans/Medical	y	y	0.98	Bernard et al 2013; Jen-Hong et al 2009	https://ac.els-cdn.com/S112017971200186X/1-s2.0-S112017971200186X-main.pdf?_tid=d7a0df1e-d106-11e7-b973-00000aab0f6c&acdnat=1511521477_1943cb46c186ead3f2a2683b34a40eca ; https://ac.els-cdn.com/S1350449509000310/1-s2.0-S1350449509000310-main.pdf?_tid=6787b2c4-d107-11e7-be07-00000aacb362&acdnat=1511521719_43cf88992584956529e0d89b49998623	4416	n	n/a	n/a	n	n/a	n	n/a	n	n/a	FLIR	e40	4417
767	Mellish et al	2015	JOURNAL OF COMPARATIVE PHYSIOLOGY B-BIOCHEMICAL SYSTEMIC AND ENVIRONMENTAL PHYSIOLOGY	185	1	143	https://link.springer.com/content/pdf/10.1007%2Fs00360-014-0868-2.pdf	seals	Mammals	y	y	0.98	n	n/a	n/a	y	sensible value	145	y	144	y	144	y	144	FLIR	p25 or P640	144
770	Han et al	2015	CELL BIOCHEMISTRY AND BIOPHYSICS	71	1	491	https://link.springer.com/content/pdf/10.1007%2Fs12013-014-0229-5.pdf	human skin	Humans/Medical	y	n	n/a	n/a	n/a	n/a	n	n/a	n/a	y	494	y	494	n	n/a	n	n	n/a
771	Biondi et al	2015	VETERINARY OPHTHALMOLOGY	18	1	28	http://onlinelibrary.wiley.com/doi/10.1111/vop.12086/epdf	dogs	Mammals	y	y	0.97	Morgan et al 1995	https://www.nature.com/articles/eye1995149.pdf	29	n	n/a	n/a	y	29	y	34	y	29	FLIR	E40	29
774	Travain et al	2015	JOURNAL OF VETERINARY BEHAVIOR-CLINICAL APPLICATIONS AND RESEARCH	10	1	17	https://ac.els-cdn.com/S1558787814002263/1-s2.0-S1558787814002263-main.pdf?_tid=ede3b68c-d10d-11e7-a901-00000aab0f27&acdnat=1511524529_ba515d76eaa1936bfd280e669f8078b1	dogs	Mammals	y	y	0.97	n	n/a	19	n	n/a	n/a	y	19	y	19	y	19	NEC	Avio TVS 500	19
776	Waddell et al	2015	AMERICAN JOURNAL OF VETERINARY RESEARCH	76	1	53	https://pdfs.semanticscholar.org/8fbf/2fd13711bdab70b19613149a2c67de3578c6.pdf	cats	Mammals	y	y	1	n	n/a	54	n	n/a	n/a	y	54	n	n/a	y	55	Meditherm Inc	MED 2000 IRIS	58
781	Rispail et al	2015	CROP & PASTURE SCIENCE	66	5	506	http://www.publish.csiro.au/cp/cp14216	plants	Plants	y	n	n/a	n/a	n/a	n/a	n	n/a	n/a	y	507	n	n/a	n	n/a	FLIR	A40	508
786	Novotny et al	2015	ACTA OF BIOENGINEERING AND BIOMECHANICS	17	2	121	https://scholar.google.com/scholar_lookup?author=J%20Novotny&atitle=The%20influence%20of%20breaststroke%20swimming%20on%20the%20muscle%20activity%20of%20young%20men%20in%20thermographic%20imaging&publication_year=2015&hl=en&journal=ACTA%20OF%20BIOENGINEERING%20AND%20BIOMECHANICS&volume=17&issue=2&pages=121-129&issn=1509-409X&doi=10.5277/ABB-00105-2014-03&pmid=26399555	humans	Humans/Medical	y	y	0.98	n	n/a	123	n	n/a	n/a	y	122	y	122	n	n/a	Fluke	TiR	123
787	Jiao et al	2015	JOURNAL OF ANIMAL AND PLANT SCIENCES	25	3	202	http://www.thejaps.org.pk/docs/Supplementary/v-25/30.pdf	rooting fruit	Plants	y	y	0.96	Veraverbeke et al 2006	https://ac.els-cdn.com/S0260877405004875/1-s2.0-S0260877405004875-main.pdf?_tid=6ba1bb9a-d114-11e7-85bf-00000aab0f26&acdnat=1511527317_7ecadef5170ebbe654180eda65642bf9	203	n	n/a	n/a	n	n/a	n	n/a	y	203	FLIR	SC620	203
794	Bortolami et al	2015	POLISH JOURNAL OF VETERINARY SCIENCES	18	4	799	https://www.degruyter.com/downloadpdf/j/pjvs.2015.18.issue-4/pjvs-2015-0104/pjvs-2015-0104.pdf	cows	Agricultural Animals	y	n	n/a	n/a	n/a	n/a	n	n/a	n/a	y	801	y	801	y	801	FLIR	P25	801
802	Vilcahuaman et al	2015	WORLD CONGRESS ON MEDICAL PHYSICS AND BIOMEDICAL ENGINEERING, 2015, VOLS 1 AND 2	51		228	saved	humans	Humans/Medical	y	y	0.98	Vilcahuaman et al 2015	n/a	in reference	y	assumed to be ambient	in reference	y	229	n	n/a	y	in reference	FLIR	i5	229
804	Vilcahuaman et al	2015	WORLD CONGRESS ON MEDICAL PHYSICS AND BIOMEDICAL ENGINEERING, 2015, VOLS 1 AND 2	51		1595	saved	humans	Humans/Medical	y	y	0.98	n	n/a	1597	y	assumed to be ambient	1596	y	1596	n	n/a	y	1597	FLIR	i6	1597
805	Ramos et al	2015	6TH INTERNATIONAL CONFERENCE ON APPLIED HUMAN FACTORS AND ERGONOMICS (AHFE 2015) AND THE AFFILIATED CONFERENCES, AHFE 2015	3		4252	https://ac.els-cdn.com/S2351978915004096/1-s2.0-S2351978915004096-main.pdf?_tid=39d5226a-d122-11e7-ab12-00000aacb362&acdnat=1511533238_3f0ee450c19f15979d2ab292d8c666d5	human hands	Humans/Medical	y	y	0.98	n	n/a	4253	n	n/a	n/a	y	4253	y	4253	y	4253	FLIR	Thermacam E320	4253
806	Pascual-Alonso et al	2015	JOURNAL OF APPLIED ANIMAL WELFARE SCIENCE	18	1	42	http://www.tandfonline.com/doi/pdf/10.1080/10888705.2014.941107?needAccess=true	lambs	Agricultural Animals	y	y	0.98	n	n/a	46	n	n/a	n/a	y	46	y	46	y	46	Testo	880	46
809	Cook et al	2015	ANIMAL	9	2	339	https://www.cambridge.org/core/services/aop-cambridge-core/content/view/86E09A963AFD460A4FBBDFD2BCD24026/S1751731114002481a_hi.pdf/infrared-thermography-detects-febrile-and-behavioural-responses-to-vaccination-of-weaned-piglets.pdf	pigs	Agricultural Animals	y	n	n/a	n/a	n/a	n/a	n	n/a	n/a	y	341	y	341	y	340	FLIR	A320	340
812	Lasanen et al	2015	PHYSIOLOGICAL MEASUREMENT	36	2	273	http://iopscience.iop.org/article/10.1088/0967-3334/36/2/273/pdf	humans	Humans/Medical	y	y	0.98	n	n/a	275	y	assumed to be ambient	275	y	275	n	n/a	y	275	FLIR	A325	275
815	Wilhelm et al	2015	VETERINARY RECORD	176	6	146	http://veterinaryrecord.bmj.com/content/176/6/146	cows	Agricultural Animals	y	y	1	n	n/a	2	y	assumed to be ambient	2	y	2	y	2	y	2	FLIR	E300	2
816	Liebisch et al	2015	PLANT METHODS	11		9	https://plantmethods.biomedcentral.com/articles/10.1186/s13007-015-0048-8	Vegetation	Plants	y	n	n/a	n/a	n/a	n/a	n	n/a	n/a	y	15	y	15	y	15	InfraTec	VarioCam 600	16
818	Talukder et al	2015	THERIOGENOLOGY	83	4	739	https://ac.els-cdn.com/S0093691X14006098/1-s2.0-S0093691X14006098-main.pdf?_tid=a718ed7c-d387-11e7-8c13-00000aacb35e&acdnat=1511796703_abbacbc4daa172772aff8b9fe309023e	cows	Agricultural Animals	y	y	0.98	n	n/a	741	y	assumed to be ambient	741	y	741	y	741	y	741	FLIR	620	741
819	Bellvert et al	2015	IRRIGATION SCIENCE	33	2	81	https://link.springer.com/article/10.1007/s00271-014-0456-y	canopy vegetation	Plants	y	n	n/a	n/a	n/a	n/a	n	n/a	n/a	n	n/a	n	n/a	y	3	FLIR	SC665	3
820	Menegassi et al	2015	INTERNATIONAL JOURNAL OF BIOMETEOROLOGY	59	3	357	https://link.springer.com/content/pdf/10.1007%2Fs00484-014-0847-z.pdf	bulls	Agricultural Animals	y	y	0.98	n	n/a	359	y	sensible value	359	y	359	y	359	y	359	FLIR	T300	359
821	Horton et al	2015	ECOLOGICAL APPLICATIONS	25	2	390	https://esajournals.onlinelibrary.wiley.com/doi/full/10.1890/14-0279.1	birds	Birds and Poultry	n	n	n/a	n/a	n/a	n/a	n	n/a	n/a	n	n/a	n	n/a	n	n/a	FLIR	Gaurdsman	394
822	Dai et al	2015	JOURNAL OF VETERINARY BEHAVIOR-CLINICAL APPLICATIONS AND RESEARCH	10	2	128	https://ac.els-cdn.com/S1558787814002329/1-s2.0-S1558787814002329-main.pdf?_tid=dfc21aac-d389-11e7-a58f-00000aacb35e&acdnat=1511797658_039210036c05a192f3305e81964d210b	horses	Agricultural Animals	y	n	n/a	n/a	n/a	n/a	y	background image	131	y	131	y	131	y	131	NEC	Avio TVS500	130
825	Purushothaman et al	2015	FIELD CROPS RESEARCH	174		1	https://ac.els-cdn.com/S0378429015000106/1-s2.0-S0378429015000106-main.pdf?_tid=1dc384d4-d38b-11e7-87ab-00000aacb362&acdnat=1511798191_7b799f3d06385bdaa894f57e8ddfc640	vegetation	Plants	y	n	n/a	n/a	n/a	n/a	n	talks about removing background emission from the saoil but unclear if it means Tref	n/a	n	n/a	n	n/a	y	3	Infrared Solutions	IR Flexcam, Infrared solutions	3
828	Menzel et al	2015	ANATOMIA HISTOLOGIA EMBRYOLOGIA	44	2	107	http://onlinelibrary.wiley.com/doi/10.1111/ahe.12115/epdf	pigs	Agricultural Animals	y	y	0.96	Schuster & Kolobrodov, 2004 & Diakides & Bronzino, 2008	NOT found; https://www.crcpress.com/Medical-Infrared-Imaging/Diakides-Bronzino/p/book/9780849390272	110	n	n/a	n/a	y	110	y	110	n	n/a	Infratec	VarioCAM hr Inspec	110
831	Alsaaod et al	2015	JOURNAL OF DAIRY SCIENCE	98	4	2381	https://ac.els-cdn.com/S0022030215000715/1-s2.0-S0022030215000715-main.pdf?_tid=742c2914-d38d-11e7-aa75-00000aacb35f&acdnat=1511799195_19d6641b5250031ab38a322aca66b6b5	cows	Agricultural Animals	y	y	0.95	n	n/a	2383	y	assumed to be ambient	2383	y	2383	n	n/a	y	2383	Fluke	Ti25 IR fusion	2383
832	Maniar et al	2015	JOURNAL OF THERMAL BIOLOGY	49		33	https://ac.els-cdn.com/S0306456515000182/1-s2.0-S0306456515000182-main.pdf?_tid=029e99e8-d38e-11e7-a793-00000aacb362&acdnat=1511799434_eda4213ff4e298311bd77273c1ce2ef1	human skin	Humans/Medical	y	y	0.98	Steketee 1973	http://iopscience.iop.org/article/10.1088/0031-9155/18/5/307/pdf	35	y	assumed to be ambient	35	y	35	y	35	y	35	FLIR	A305sc	35
835	Aguilar et al	2015	INTERNATIONAL AGROPHYSICS	29	2	147	https://www.degruyter.com/downloadpdf/j/intag.2015.29.issue-2/intag-2015-0028/intag-2015-0028.pdf	seeds	Plants	y	n	n/a	n/a	n/a	n/a	n	n/a	n/a	y	148	n	n/a	n	n/a	FLIR	i5	148
836	Baldini et al	2015	AEROSPACE MEDICINE AND HUMAN PERFORMANCE	86	4	374	http://www.terapia-ortodontica.it/wp-content/uploads/2015/09/asem3.pdf	human gums	Humans/Medical	y	n	n/a	n/a	n/a	n/a	n	n/a	n/a	y	2	y	2	y	2	FLIR	SC640	2
839	Zhang et al	2015	AGRICULTURAL WATER MANAGEMENT	153		32	https://ac.els-cdn.com/S0378377415000487/1-s2.0-S0378377415000487-main.pdf?_tid=63c27800-d390-11e7-ae5f-00000aacb35f&acdnat=1511800456_ffd9cd4222f7e62a0dc890708ba5a4ca	canopy vegetation	Plants	y	y	0.98	n	n/a	33	n	n/a	n/a	y	33	y	33	n	n/a	NEC	IRC	33
840	Edner et al	2015	EQUINE VETERINARY JOURNAL	47	3	302	http://onlinelibrary.wiley.com/doi/10.1111/evj.12291/epdf	horses	Agricultural Animals	y	n	n/a	n/a	n/a	n/a	n	n/a	n/a	y	303	n	n/a	y	303	IRIS	Iris 7.5	303
843	Gomex-Bellot et al	2015	BIOSYSTEMS ENGINEERING	133		21	https://ac.els-cdn.com/S1537511015000379/1-s2.0-S1537511015000379-main.pdf?_tid=36eaaea4-d392-11e7-ae7c-00000aacb360&acdnat=1511801240_ccaa49a25a6f58091d66bd2c260b7131	vegetation	Plants	y	y	0.96	Grant et al 2006; Jones 2004; Leinonen et al 2006	http://onlinelibrary.wiley.com/doi/10.1111/j.1399-3054.2006.00686.x/epdf ; http://www.sciencedirect.com/science/article/pii/S0065229604410039 ; http://onlinelibrary.wiley.com/doi/10.1111/j.1365-3040.2006.01528.x/epdf	24	y	foil mirror	23	y	23	y	24	y	23	FLIR	E50	23
847	Mayes et al	2015	POULTRY SCIENCE	94	6	1105	https://academic.oup.com/ps/article/94/6/1105/1559539	turkeys	Birds and Poultry	y	y	1	manufacturer'	n/a	1107	n	n/a	n/a	y	1107	y	1107	y	1109	FLIR	S60	1107
849	Talukder et al	2015	SMALL RUMINANT RESEARCH	127		80	https://ac.els-cdn.com/S0921448815001492/1-s2.0-S0921448815001492-main.pdf?_tid=3c8fe9fc-d395-11e7-bbf9-00000aab0f27&acdnat=1511802538_e0ec3f6b07a13edb7d3703e19d953df2	sheep	Agricultural Animals	y	y	0.98	n	n/a	82	y	assumed to be ambient	82	y	82	y	82	y	82	FLIR	620	82
850	Metzner et al	2015	VETERINARY JOURNAL	204	3	360	https://ac.els-cdn.com/S1090023315001550/1-s2.0-S1090023315001550-main.pdf?_tid=dd895a64-d395-11e7-97b8-00000aacb361&acdnat=1511802816_9c9152d1a96866e09902829e942e65cc	cows	Agricultural Animals	y	n	n/a	n/a	n/a	n/a	n	n/a	n/a	n	n/a	n	n/a	n	n/a	n	n	n/a
854	Montanholi et al	2015	JOURNAL OF ANIMAL SCIENCE AND BIOTECHNOLOGY	6		27	https://jasbsci.biomedcentral.com/track/pdf/10.1186/s40104-015-0027-y?site=jasbsci.biomedcentral.com	cows	Agricultural Animals	y	y	0.98	n	n/a	3	n	noted as a source of error	14	y	4	y	4	y	3	FLIR	i40, T250, SC2000	2
857	Ioannou et al	2015	FRONTIERS IN BEHAVIORAL NEUROSCIENCE	9		160	https://www.ncbi.nlm.nih.gov/pmc/articles/PMC4472989/pdf/fnbeh-09-00160.pdf	monkeys	Mammals	y	n	n/a	n/a	n/a	n/a	n	n/a	n/a	n	n/a	n	n/a	y	3	ThermoPro	TP8	3
858	Yanmaz et al	2015	KAFKAS UNIVERSITESI VETERINER FAKULTESI DERGISI	21	4	615	https://scholar.google.com/scholar_lookup?author=L%20Yanmaz&atitle=Comparison%20of%20Rectal,%20Eye%20and%20Ear%20Temperatures%20in%20Kangal%20Breed%20Dogs&publication_year=2015&hl=en&journal=KAFKAS%20UNIVERSITESI%20VETERINER%20FAKULTESI%20DERGISI&volume=21&issue=4&pages=615-617&issn=1300-6045&doi=10.9775/kvfd.2015.13037	dogs	Mammals	y	n	n/a	n/a	n/a	n/a	n	n/a	n/a	y	616	y	616	y	616	Infrared Solutions	IR FlexCAM S	616
861	Burns et al	2015	JOURNAL OF THERMAL BIOLOGY	51		15	http://www.sciencedirect.com/science/article/pii/S0306456515000315	turtles & eggs	Reptiles and Amphibians	y	y	0.98 (egg and turtle)	McCafferty et al 2013, Rowe et al 2013, Mortola 2013	http://rsbl.royalsocietypublishing.org/content/roybiolett/9/3/20121192.full.pdf ; http://jeb.biologists.org/content/jexbio/216/10/1774.full.pdf ; https://www.researchgate.net/profile/Jacopo_Mortola/publication/235414410_Thermographic_Analysis_of_Body_Surface_Temperature_of_Mammals/links/02e7e526e55bb4b52c000000.pdf	16 & 17	n	n/a	n/a	y	17	y	17	n	n/a	Fluke	62 Max+ or Ti20	16
862	Pavelski et al	2015	CIENCIA RURAL	45	7	1274	http://www.scielo.br/pdf/cr/v45n7/1678-4596-cr-0103_8478cr20140675.pdf	horses	Agricultural Animals	y	n	n/a	n/a	n/a	n/a	n	n/a	n/a	y	1275	n	n/a	y	1275	FLIR	E-40	1275
867	Charrier et al	2015	NEW PHYTOLOGIST	207	3	570	http://onlinelibrary.wiley.com/doi/10.1111/nph.13361/epdf	vegetation	Plants	y	n	n/a	n/a	n/a	n/a	n	n/a	n/a	y	571	n	n/a	n	n/a	FLIR	ThermaCAM s60	572
868	Kafer et al	2015	JOURNAL OF COMPARATIVE PHYSIOLOGY B-BIOCHEMICAL SYSTEMIC AND ENVIRONMENTAL PHYSIOLOGY	185	6	647	https://link.springer.com/content/pdf/10.1007%2Fs00360-015-0915-7.pdf	wasps	insects	y	y	0.97	Kovac and stabentheiner 1999	https://ac.els-cdn.com/S0022191098001152/1-s2.0-S0022191098001152-main.pdf?_tid=1f82e222-d3a1-11e7-9126-00000aab0f26&acdnat=1511807643_dea27e06dc7c28e031630b58ccc1eeb8	650	n	n/a	n/a	y	649	y	649	n	n/a	FLIR	ThermaCAM SC2000 NTS FLIR	650
870	Dumont et al	2015	COMPUTERS AND ELECTRONICS IN AGRICULTURE	116		118	https://ac.els-cdn.com/S0168169915001672/1-s2.0-S0168169915001672-main.pdf?_tid=74a6aacc-d3a1-11e7-ad2f-00000aab0f6b&acdnat=1511807786_db41c71c3c639cdca44c06b266182c60	seeds	Plants	y	n	n/a	n/a	n/a	n/a	n	n/a	n/a	y	119	y	119	y	Fig 2.	FLIR	SC7000	119
871	Birt et al	2015	JOURNAL OF EQUINE VETERINARY SCIENCE	35	8	636	https://ac.els-cdn.com/S073708061500413X/1-s2.0-S073708061500413X-main.pdf?_tid=f265bc50-d3a1-11e7-bbf9-00000aab0f27&acdnat=1511807997_b7712e1d6ddf93825bd225cda13e17b5	horses	Agricultural Animals	y	n	n/a	n/a	n/a	n/a	y	assumed to be ambient	638	y	638	y	638	y	638	FLIR	model unknown	638
873	Quesada et al	2015	JOURNAL OF THERMAL BIOLOGY	52		130	https://ac.els-cdn.com/S0306456515300346/1-s2.0-S0306456515300346-main.pdf?_tid=18fdfdae-d3a3-11e7-ae7c-00000aacb360&acdnat=1511808491_3bd6a784d1b15c49adbcf6f3fa108e5e	human skin	Humans/Medical	y	y	0.98	Bernard et al 2013	https://www.sciencedirect.com/science/article/pii/S112017971200186X	132	y	ISO 2008 method?	131	y	131	y	131	y	131	FLIR	E60	131
875	Yuan et al	2015	JOURNAL OF FORESTRY RESEARCH	26	3	605	https://link.springer.com/content/pdf/10.1007%2Fs11676-015-0075-3.pdf	plants	Plants	y	n	n/a	n/a	n/a	n/a	n	n/a	n/a	y	606	y	606	y	607	Fluke	Ti55FT IR FLEXcam	607
877	Stock et al	2015	JOURNAL OF DAIRY SCIENCE	98	9	6058	https://ac.els-cdn.com/S0022030215004397/1-s2.0-S0022030215004397-main.pdf?_tid=033711ee-d41c-11e7-96d5-00000aacb360&acdnat=1511860424_f8a4e27c5766c1afe142b9b46a475b55	cows	Agricultural Animals	y	n	n/a	n/a	n/a	n/a	y	assumed to be ambient	6062	y	6062	y	6062	y	6062	FLIR	SC 660	6062
878	Schmidt et al	2015	JOURNAL OF DAIRY SCIENCE	98	9	6609	https://ac.els-cdn.com/S0022030215004749/1-s2.0-S0022030215004749-main.pdf?_tid=3b112b54-d426-11e7-8086-00000aab0f01&acdnat=1511864812_9e92654d8e7299c4a49c5c41afb06536	silos	Other	y	n	n/a	n/a	n/a	n/a	n	n/a	n/a	y	6610	n	n/a	n	n/a	Fluke	Ti25	6610
884	McGowan et al	2015	VETERINARY SURGERY	44	7	874	http://onlinelibrary.wiley.com/doi/10.1111/vsu.12372/epdf	dogs	Mammals	y	n	n/a	n/a	n/a	n/a	n	n/a	n/a	y	876	n	n/a	y	876	Meditherm	Med 2000 IRIS	876
887	Belloni et al	2015	BRAZILIAN JOURNAL OF POULTRY SCIENCE	17	4	467	http://www.scielo.br/pdf/rbca/v17n4/1516-635X-rbca-17-04-00467.pdf	birds	Birds and Poultry	y	y	0.92 (tiles), 0.94-0.95 (birds)	Naas et al 2001 ; Naas et al 2010	https://scholar.google.co.uk/scholar?hl=en&as_sdt=0%2C5&q=N%C3%A4%C3%A4s+IA%2C+Sevegnani%2C+KB%2C+Marcheto+FG%2C+Espelho+JCC%2C+Menegassi+V%2C+Silva+IJO.+Avalia%C3%A7%C3%A3o+t%C3%A9rmica+de+telhas+de+composi%C3%A7%C3%A3o+de+celulose+e+betumem%2C+pintadas+de+branco%2C+em+modelos+de+avi%C3%A1rios+com+escala+reduzida.+Engenharia+Agr%C3%ADcola+2001%3B21%282%29%3A121-126.&btnG= ; Nääs IA, Romanini CEB…	468	y	assumed to be ambient	469	y	469	y	469	y	468	Testo	875	468
891	Du et al	2015	JOURNAL OF INTEGRATIVE PLANT BIOLOGY	57	11	954	http://onlinelibrary.wiley.com/doi/10.1111/jipb.12313/epdf	vegetation	Plants	y	n	n/a	n/a	n/a	n/a	n	n/a	n/a	n	n/a	n	n/a	n	n/a	FLIR	ThermaCAM A320	966
892	Pavelski et al	2015	JOURNAL OF VETERINARY INTERNAL MEDICINE	29	6	1578	http://onlinelibrary.wiley.com/doi/10.1111/jvim.13597/epdf	dogs	Mammals	y	n	n/a	n/a	n/a	n/a	n	n/a	n/a	y	1579	y	1579	y	1579	FLIR	E40b	1579
895	Matzner et al	2015	ECOLOGICAL INFORMATICS	30		20	https://ac.els-cdn.com/S1574954115001478/1-s2.0-S1574954115001478-main.pdf?_tid=bf43dd2a-d42d-11e7-b868-00000aacb362&acdnat=1511868040_8805fe0e925bb0d83b70d8fb2957a0b8	birds	Birds and Poultry	n	n	n/a	n/a	n/a	n/a	n	n/a	n/a	n	n/a	n	n/a	y	paper is about working that out	various	various	table 1
896	Cruz et al	2015	SMALL RUMINANT RESEARCH	132		86	https://ac.els-cdn.com/S092144881530081X/1-s2.0-S092144881530081X-main.pdf?_tid=6239f604-d42e-11e7-968a-00000aacb360&acdnat=1511868314_d02efbc42f67e4d3b4524bc0e1c56c3c	sheep	Agricultural Animals	y	n	n/a	n/a	n/a	n/a	n	n/a	n/a	y	87	y	87	y	87	FLIR	Thermacam model unknown	87
898	Gillette et al	2015	JOURNAL OF FISH AND WILDLIFE MANAGEMENT	6	2	486	http://www.fwspubs.org/doi/pdf/10.3996/022015-JFWM-008	birds	Birds and Poultry	n	n	n/a	n/a	n/a	n/a	n	n/a	n/a	y	487	n	n/a	y	488	FLIR	SC7650	488
899	Cardoso et al	2015	LIVESTOCK SCIENCE	182		83	https://ac.els-cdn.com/S1871141315300226/1-s2.0-S1871141315300226-main.pdf?_tid=7c0916a6-d432-11e7-8f12-00000aacb362&acdnat=1511870084_783abea9dd91826d7d86094201cb5d96	cows	Agricultural Animals	y	n	n/a	n/a	n/a	n/a	n	n/a	n/a	y	84	y	84	y	84	FLIR	T400	84
900	Herborn et al	2015	PHYSIOLOGY & BEHAVIOR	152		225	https://ac.els-cdn.com/S0031938415301293/1-s2.0-S0031938415301293-main.pdf?_tid=82b1a972-d433-11e7-a64a-00000aacb361&acdnat=1511870516_ae82d62bdd6a69cfd33bfa4c2cc0c1a5	hens	Birds and Poultry	y	y	0.97	n	n/a	227	n	n/a	n/a	y	226	n	n/a	n	n/a	FLIR	SC640	226
901	Mattila	2015	ECOLOGY AND EVOLUTION	5	23	5539	http://onlinelibrary.wiley.com/doi/10.1002/ece3.1758/epdf	butterflies	insects	y	y	0.95	n	n/a	5543	y	assumed to be ambient	5542	y	5542	y	5542	n	n/a	DIAS	pyroview 380L	5542
902	Deeming & Pike	2015	ACTA ORNITHOLOGICA	50	2	247	saved	nests	Birds and Poultry	y	n	n/a	n/a	n/a	n/a	y	empty image?	248	n	n/a	n	n/a	y	248	FLIR	i7	248
908	Menegassi et al	2016	INTERNATIONAL JOURNAL OF BIOMETEOROLOGY	60	1	151	https://link.springer.com/content/pdf/10.1007%2Fs00484-015-1013-y.pdf	bulls	Agricultural Animals	y	n	n/a	n/a	n/a	n/a	n	n/a	n/a	y	152	y	152	y	153	FLIR	T300	153
909	Martello et al	2016	INTERNATIONAL JOURNAL OF BIOMETEOROLOGY	60	1	173	https://link.springer.com/content/pdf/10.1007%2Fs00484-015-1015-9.pdf	cattle	Agricultural Animals	y	y	0.98	manufacturer	n/a	175	n	n/a	n/a	y	175	y	175	y	175	Fluke	Ti20-9	175
910	Dickinson et al	2016	INTERNATIONAL JOURNAL OF WILDLAND FIRE	25	1	48	saved	burnt earth	Earth and Soil	y	y	0.98	n	n/a	51	n	n/a	n/a	n	n/a	n	n/a	y	52	FLIR	SC660	51
911	O'Brien et al	2016	INTERNATIONAL JOURNAL OF WILDLAND FIRE	25	1	62	https://scholar.google.com/scholar_lookup?author=J%20O%27Brien&atitle=High-resolution%20infrared%20thermography%20for%20capturing%20wildland%20fire%20behaviour%20-%20RxCADRE%202012&publication_year=2016&hl=en&journal=INTERNATIONAL%20JOURNAL%20OF%20WILDLAND%20FIRE&volume=25&issue=1&pages=62-75&issn=1049-8001&doi=10.1071/WF14165	soil	Earth and Soil	y	y	0.98	Snyder et al 1998; Lopez et al 2012	http://www.tandfonline.com/doi/pdf/10.1080/014311698214497; http://www.sciencedirect.com/science/article/pii/S0304423812000428	65	n	n/a	n/a	y	65	y	65	y	64	FLIR	SC660, S60, T640	63
915	Vicente-Perez et al	2016	JOURNAL OF THERMAL BIOLOGY	55		1	https://ac.els-cdn.com/S0306456515301029/1-s2.0-S0306456515301029-main.pdf?_tid=6fedbb2e-d43c-11e7-9d77-00000aacb360&acdnat=1511874350_8c70eca24313c832e6d3b920e318b44c	pigs	Agricultural Animals	y	n	n/a	n/a	n/a	n/a	n	n/a	n/a	y	2	y	2	y	2	Fluke	Ti10	2
917	Sanchez et al	2016	APPLIED ANIMAL BEHAVIOUR SCIENCE	174		58	https://ac.els-cdn.com/S016815911500310X/1-s2.0-S016815911500310X-main.pdf?_tid=99ae3d8c-d444-11e7-a015-00000aacb35d&acdnat=1511877856_b2a697560f9a212920a86a9c5a22719b	horses	Agricultural Animals	y	n	n/a	n/a	n/a	n/a	n	n/a	n/a	n	n/a	n	n/a	n	n/a	FLIR	i7	59
919	Monteiro et al	2016	AUSTRALIAN JOURNAL OF BOTANY	64	1	32	http://centaur.reading.ac.uk/46978/3/Vaz%20Monteiro%20et%20al%20leaf%20paper%20revised%20final%20Centaur%20Nov%202015.pdf	vegetation	Plants	y	y	0.97	Lopez et al 2012	https://ac.els-cdn.com/S0304423812000428/1-s2.0-S0304423812000428-main.pdf?_tid=91f8743e-c0aa-11e7-9c09-00000aacb35d&acdnat=1509722628_85fb02f2ab04c98279cae8b940b14dbb	12	n	n/a	n/a	y	10	y	10	y	12	NEC	Thermo Tracer TH7800	12
921	Guertler et al	2016	AQUACULTURAL ENGINEERING	70		63	https://ac.els-cdn.com/S0144860915300339/1-s2.0-S0144860915300339-main.pdf?_tid=1a31f04a-d44d-11e7-a6ec-00000aab0f6b&acdnat=1511881516_917ba3dfd308af7cac20043a8e802d2c	humans	Humans/Medical	y	n	n/a	n/a	n/a	n/a	n	n/a	n/a	n	n/a	n	n/a	y	65	FLIR	e40	65
922	Prat-Guitart et al	2016	INTERNATIONAL JOURNAL OF WILDLAND FIRE	25	4	456	http://www.publish.csiro.au/wf/pdf/WF15103	peat	Earth and Soil	y	n	n/a	n/a	n/a	n/a	n	n/a	n/a	n	n/a	n	n/a	n	n/a	FLIR	ThermaCAM SC640	457
925	Xu et al	2016	INTERNATIONAL JOURNAL OF AGRICULTURE AND BIOLOGY	18	3	565	http://www.fspublishers.org/published_papers/29044_..pdf	rice	Plants	y	n	n/a	n/a	n/a	n/a	n	n/a	n/a	y	566	y	566	n	n/a	FLIR	ThermaCam P25	566
926	Zhang et al	2016	BIOMICROFLUIDICS	10	1	11911	https://www.ncbi.nlm.nih.gov/pmc/articles/PMC4769262/	humans	Humans/Medical	y	n	n/a	n/a	n/a	n/a	n	n/a	n/a	n	n/a	n	n/a	n	n/a	Fluke	TiXX640/660	5
927	de Ruediger et al	2016	SEMINA-CIENCIAS AGRARIAS	37	1	221	http://www.redalyc.org/html/4457/445744667021/	bulls	Agricultural Animals	y	n	n/a	n/a	n/a	n/a	n	n/a	n/a	y	223	y	223	y	223	FLIR	E-40	223
928	Fuentes-Oliver et l	2016	MEDICAL PHYSICS: Fourteenth Mexican Symposium on Medical Physics	1747		80013	http://aip.scitation.org/doi/pdf/10.1063/1.4954133	humans	Humans/Medical	y	n	n/a	n/a	n/a	n/a	n	n/a	n/a	y	2	y	2	n	n/a	FLIR	A320	2
930	Orman & Endres	2016	ACTA AGRICULTURAE SCANDINAVICA SECTION A-ANIMAL SCIENCE	66	1	1	http://www.tandfonline.com/doi/pdf/10.1080/09064702.2016.1179785?needAccess=true	cattle	Agricultural Animals	y	y	0.98	n	n/a	2	n	n/a	n/a	y	2	n	n/a	y	2	Wahl	HSI 3000AS, Wahl	2
932	Zadeh et al	2016	EXCLI JOURNAL	15		532	https://www.ncbi.nlm.nih.gov/pmc/articles/PMC5225687/pdf/EXCLI-15-532.pdf	humans	Humans/Medical	y	y	0.96	n	n/a	Fig 10	n	n/a	n/a	y	535	n	n/a	n	n/a	NEC	Infrec R500	535
934	Weisshaupt et al	2016	BIRD STUDY	63	4	533	http://www.tandfonline.com/doi/pdf/10.1080/00063657.2016.1239693?needAccess=true	birds	Birds and Poultry	n	n	n/a	n/a	n/a	n/a	n	n/a	n/a	n	n/a	n	n/a	y	534	LORIS	IRTV-445L	534
936	Poblete-Echeverria et al	2016	XXIX INTERNATIONAL HORTICULTURAL CONGRESS ON HORTICULTURE: SUSTAINING LIVES, LIVELIHOODS AND LANDSCAPES (IHC2014): INTERNATIONAL SYMPOSIA ON WATER, ECO-EFFICIENCY AND TRANSFORMATION OF ORGANIC WASTE IN HORTICULTURAL PRODUCTION	1112		141	https://scholar.google.co.uk/scholar?hl=en&as_sdt=0%2C5&q=Plant+water+stress+detection+based+on+aerial+and+terrestrial+infrared+thermography%3A+a+study+case+from+vineyard+and+olive+orchard&btnG=	vegetation	Plants	y	n	n/a	n/a	n/a	n/a	n	n/a	n/a	n	n/a	n	n/a	n	n/a	FLIR	i40	142
938	Thorling et al	2016	SPIE BIOPHOTONICS AUSTRALASIA	10013		UNSP 100131J	http://search.ror.unisa.edu.au/record/UNISA_ALMA51146567150001831/media/digital/open/9916138276801831/12146567110001831/13146567100001831/pdf	humans	Humans/Medical	y	y	0.98	n	n/a	2	n	n/a	n/a	y	2	y	2	y	2	FLIR	T460	2
940	Cayli et al	2016	KAHRAMANMARAS SUTCU IMAM UNIVERSITY JOURNAL OF NATURAL SCIENCES	19	1	5	saved	plants	Plants	y	n	n/a	n/a	n/a	n/a	n	n/a	n/a	y	7	y	7	y	7	FLIR	T200
944	Yousfi et al	2016	AGRICULTURAL WATER MANAGEMENT	164		137	https://ac.els-cdn.com/S0378377415301062/1-s2.0-S0378377415301062-main.pdf?_tid=561d3cac-d46d-11e7-8f13-00000aacb362&acdnat=1511895352_9d1c2ac93f385a95105812407372ef30	vegetation	Plants	y	n	n/a	n/a	n/a	n/a	n	n/a	n/a	y	139	y	139	y	139	DIAS	MIDAS 320L	139
947	Alfonzo et al	2016	INTERNATIONAL JOURNAL OF BIOMETEOROLOGY	60	2	245	https://link.springer.com/content/pdf/10.1007%2Fs00484-015-1021-y.pdf	cows	Agricultural Animals	y	n	n/a	n/a	n/a	n/a	n	n/a	n/a	y	246	y	246	y	247	FLIR	T300	247
948	Rodriguez et al	2016	LIVESTOCK SCIENCE	184		92	https://ac.els-cdn.com/S1871141315300597/1-s2.0-S1871141315300597-main.pdf?_tid=b7f44bd2-d4f9-11e7-a4aa-00000aacb362&acdnat=1511955646_da53900fed7b95a80b6e1c43b5a6a37c	cows	Agricultural Animals	y	y	0.95	manufacturer	n/a	93	n	n/a	n/a	y	93	y	93	n	n/a	FLIR	I5	93
950	EL Bitar et al	2016	JOURNAL OF NEUROPHYSIOLOGY	115	2	773	https://scholar.google.co.uk/scholar?hl=en&as_sdt=0%2C5&q=The+rostral+ventromedial+medulla+control+of+cutaneous+vasomotion+of+paws+and+tail+in+the+rat%3A+implication+for+pain+studies&btnG=	rats	Mammals	y	n	n/a	n/a	n/a	n/a	n	n/a	n/a	y	774	n	n/a	y	775	CEDIP	JADE MWIR	775
951	Faye et al	2016	JOURNAL OF THERMAL BIOLOGY	56		1	https://ac.els-cdn.com/S030645651530070X/1-s2.0-S030645651530070X-main.pdf?_tid=11bb217a-d4fc-11e7-85ce-00000aacb35d&acdnat=1511956655_1ca2c29bacaebf3fa37dbdff8dcb26fb	methodological assesment	Other	y	y	1	Hong et al 2000	https://link.springer.com/content/pdf/10.1023%2FA%3A1008102521322.pdf	2	n	n/a	n/a	y	2	y	2	y	2	FLIR	B335	2
952	Jo & Kim	2016	JOURNAL OF THERMAL BIOLOGY	56		55	https://ac.els-cdn.com/S0306456515301534/1-s2.0-S0306456515301534-main.pdf?_tid=34052d06-d4fd-11e7-a3d3-00000aacb362&acdnat=1511957142_acd73366be25b46dc8fb4db0a742e4d1	human skin	Humans/Medical	y	y	0.97	n	n/a	56	n	n/a	n/a	y	56	y	56	y	56	L3 Communications holdings	L3 Communications holdings	56
953	Gallego et al	2016	JOURNAL OF THERMAL BIOLOGY	56		113	https://ac.els-cdn.com/S0306456515301121/1-s2.0-S0306456515301121-main.pdf?_tid=e78cdf9a-d4fd-11e7-9431-00000aab0f27&acdnat=1511957443_19e28762f06f3b739795f0d96825690a	insects	insects	y	y	0.95	measured	n/a	114	n	n/a	n/a	n	n/a	n	n/a	n	n/a	FLIR	P620	114
954	Jioz et al	2016	COMPUTERS AND ELECTRONICS IN AGRICULTURE	121		135	https://ac.els-cdn.com/S0168169915003889/1-s2.0-S0168169915003889-main.pdf?_tid=e5759516-d4fe-11e7-85ce-00000aacb35d&acdnat=1511957869_3a79ae0c91a6d9a7889911a8e067abc1	plants	Plants	n	n	n/a	n/a	n/a	n/a	n	n/a	n/a	y	table 2	y	table 2	y	136	FLIR	SC620	136
955	Mangus et al	2016	COMPUTERS AND ELECTRONICS IN AGRICULTURE	121		149	https://ac.els-cdn.com/S0168169915003890/1-s2.0-S0168169915003890-main.pdf?_tid=4b571016-d500-11e7-b793-00000aacb361&acdnat=1511958470_f5d38e612da04bd5beda9fdd4f9a4a8e	canopy temperture	Plants	y	y	0.95	Idso et al 1981	https://ac.els-cdn.com/0002157181900327/1-s2.0-0002157181900327-main.pdf?_tid=86f84ec2-d501-11e7-b3f4-00000aacb35d&acdnat=1511958999_6dccce24629f4a4f0fa0043c2483d304	153	n	n/a	n/a	y	152	y	152	y	151	TIR	Tamarisk 320	151
959	Rode et al	2016	JOURNAL OF EQUINE VETERINARY SCIENCE	38		33	https://ac.els-cdn.com/S0737080616000046/1-s2.0-S0737080616000046-main.pdf?_tid=b3a12fbe-d503-11e7-8f18-00000aab0f26&acdnat=1511959933_f91656b429d272d34a3d1b84009d1f2a	bulls	Agricultural Animals	y	n	n/a	n/a	n/a	n/a	n	n/a	n/a	n	n/a	n	n/a	n	n/a	InfraTec	VarioCAM hr Inspec	36
962	Livingston et al	2016	EUROPEAN JOURNAL OF AGRONOMY	74		164	https://ac.els-cdn.com/S1161030115300769/1-s2.0-S1161030115300769-main.pdf?_tid=aca2a052-d504-11e7-a2ad-00000aacb361&acdnat=1511960351_88c03f009de25081071ee9f52a4db0b1	vegetation	Plants	y	n	n/a	n/a	n/a	n/a	n	n/a	n/a	y	165	n	n/a	n	n/a	FLIR	T620	165
964	Barros et al	2016	ARQUIVO BRASILEIRO DE MEDICINA VETERINARIA E ZOOTECNIA	68	2	422	http://www.scielo.br/pdf/abmvz/v68n2/0102-0935-abmvz-68-02-00422.pdf	bulls	Agricultural Animals	y	y	0.98	Hoffmann et al 2013	https://link.springer.com/content/pdf/10.1007%2Fs11259-012-9549-3.pdf	424	n	n/a	n/a	y	424	y	424	y	424	FLIR	A320	424
965	Gomes et al	2016	JOURNAL OF ANIMAL SCIENCE	94	3	1105	https://scholar.google.com/scholar_lookup?author=R%20Gomes&atitle=Technical%20note:%20Relationship%20between%20infrared%20thermography%20and%20heat%20production%20in%20young%20bulls&publication_year=2016&hl=en&journal=JOURNAL%20OF%20ANIMAL%20SCIENCE&volume=94&issue=3&pages=1105-1109&issn=0021-8812&doi=10.2527/jas2015-0004&pmid=27065272	bulls	Agricultural Animals	y	y	0.98	n	n/a	1106	n	n/a	n/a	y	1106	y	1106	y	1106	Fluke	Ti 55ft	1105
968	Bailey et al	2016	AGRICULTURAL AND FOREST METEOROLOGY	218		146	https://ac.els-cdn.com/S016819231500787X/1-s2.0-S016819231500787X-main.pdf?_tid=f609bd22-d507-11e7-840a-00000aacb35e&acdnat=1511961763_e9e07597d1a73481c6992bb7ff6a0c4a	vegetation	Plants	y	y	0.96	Lopez et al 2012	https://ac.els-cdn.com/S0304423812000428/1-s2.0-S0304423812000428-main.pdf?_tid=91f8743e-c0aa-11e7-9c09-00000aacb35d&acdnat=1509722628_85fb02f2ab04c98279cae8b940b14dbb	155	n	n/a	n/a	y	152	y	152	y	151	FLIR	T420	150
970	Lecorps et al	2016	PHYSIOLOGY & BEHAVIOR	157		209	https://www.sciencedirect.com/science/article/pii/S0031938416300580	mice	Mammals	y	y	0.95	n	n/a	210	n	n/a	n/a	y	211	n	n/a	n	n/a	FLIR	T650sc	210
971	Robinson et al	2016	EXPERIMENTAL PHYSIOLOGY	101	4	549	http://onlinelibrary.wiley.com/doi/10.1113/EP085642/epdf	skin	Humans/Medical	y	n	n/a	n/a	n/a	n/a	y	assumed to be ambient	551	y	551	n	n/a	n	n/a	FLIR	B425	551
972	Faye et al	2016	METHODS IN ECOLOGY AND EVOLUTION	7	4	437	http://onlinelibrary.wiley.com/doi/10.1111/2041-210X.12488/epdf	patato flower and vegetation	Plants	y	y	0.94-0.98	Rubio et al 1997	https://ac.els-cdn.com/S003442579600123X/1-s2.0-S003442579600123X-main.pdf?_tid=d1a68d78-ba56-11e7-89c2-00000aab0f6c&acdnat=1509026950_b64678d38afd4aab388313030e943c79	442	n	n/a	n/a	y	439	n	n/a	y	439	InfraTec	HR research 680	438
974	Zhang et al	2016	JOURNAL OF THERMAL BIOLOGY	57		78	https://ac.els-cdn.com/S030645651530111X/1-s2.0-S030645651530111X-main.pdf?_tid=914b0d5e-ba50-11e7-9b06-00000aab0f01&acdnat=1509024265_ffd68fc5414b5f0d2b07f867b20650d3	pigs various parts	Agricultural Animals	y	y	used a range	measured	n/a	80	y	minimised	79-80	y	79	y	79	y	80	FLIR	SC620	79
978	Takeda & Glenn	2016	EUROPEAN JOURNAL OF HORTICULTURAL SCIENCE	81	2	115	http://www.pubhort.org/ejhs/81/2/5/81_2_5.pdf	vegetation	Plants	y	n	n/a	n/a	n/a	n/a	n	n/a	n/a	y	117	n	n/a	n	n/a	FLIR	Model A40	117
979	Sypniewski et al	2016	AMPHIBIA-REPTILIA	25	2	110	https://ac.els-cdn.com/S1557506316300118/1-s2.0-S1557506316300118-main.pdf?_tid=36234c70-d517-11e7-bded-00000aab0f26&acdnat=1511968313_c17d7f8ab7115537495060a8db024075	turtles	Reptiles and Amphibians	y	n	n/a	n/a	n/a	n/a	n	n/a	n/a	n	n/a	n	n/a	n	n/a	Infrared Cameras Inc	ETIP 7320 P series	112
981	Seuront & Ng	2016	JOURNAL OF MOLLUSCAN STUDIES	82		336	https://academic.oup.com/mollus/article/82/2/336/2607360	snails and substrate	Other	y	n	n/a	n/a	n/a	n/a	n	n/a	n/a	n	n/a	n	n/a	n	n/a	Fluke & Testo	Testo 875-1iSR & Fluke Ti25	337
982	Koprowski	2016	JOURNAL OF BIOPHOTONICS	9	5	510	http://onlinelibrary.wiley.com/doi/10.1002/jbio.201500224/epdf	humans	Humans/Medical	y	y	0.98	Hardy 1934	https://www.ncbi.nlm.nih.gov/pmc/articles/PMC436017/pdf/jcinvest00735-0099.pdf	511	y	input not given	512	y	512	y	512	n	n/a	FLIR	T420	511
983	Gillis et al	2016	JOURNAL OF THERMAL BIOLOGY	58		99	https://ac.els-cdn.com/S0306456515301790/1-s2.0-S0306456515301790-main.pdf?_tid=c5aee7a8-d519-11e7-a06f-00000aacb35f&acdnat=1511969413_59d7e91ab31273297f2ae5899e061082	humans	Humans/Medical	y	n	n/a	n/a	n/a	n/a	n	n/a	n/a	y	100	y	100	n	n/a	FLIR	A320	100
985	Travain et al	2016	PHYSIOLOGY & BEHAVIOR	159		80	https://ac.els-cdn.com/S0031938416301056/1-s2.0-S0031938416301056-main.pdf?_tid=96fad25e-d51a-11e7-840a-00000aacb35e&acdnat=1511969764_2f6fa1f533e9bacebcf5372104fe3a9f	dogs	Mammals	y	y	0.97	n	n/a	82	y	says that it did but not explained how	82	y	81	y	81	y	82	NEC	TVS500	82
987	Wang et al	2016	PLANT GROWTH REGULATION	79	2	157	https://link.springer.com/article/10.1007/s10725-015-0121-3	vegetation	Plants	y	n	n/a	n/a	n/a	n/a	n	n/a	n/a	y	3	y	3	y	3	FLIR	T400	3
991	Zaragotas et al	2016	CRYOBIOLOGY	72	3	239	https://ac.els-cdn.com/S0011224016300384/1-s2.0-S0011224016300384-main.pdf?_tid=007d02f8-d51e-11e7-86e3-00000aacb35d&acdnat=1511971238_770096ce7f3470b07cbadc716ee56693	plants	Plants	y	n	n/a	n/a	n/a	n/a	n	n/a	n/a	y	240	n	n/a	n	n/a	FLIR	A310	240
992	Botella-Cruz et al	2016	LIMNETICA	35	1	131	http://www.limnetica.com/Limnetica/Limne35/L35a131_Thermal_tolerance_Enochrus_politus.pdf	beetles	insects	y	n	n/a	n/a	n/a	n/a	n	n/a	n/a	y	134	n	n/a	n	n/a	FLIR	SC305	134
995	Duncan et al	2016	JOURNAL OF ZOO AND WILDLIFE MEDICINE	47	2	474	saved	Penguins	Birds and Poultry	y	y	0.98	n	n/a	475	y	assumed to be ambient	475	y	475	y	475	y	475	FLIR	T400	475
999	Formenti et al	2016	JOURNAL OF THERMAL BIOLOGY	59		58	https://ac.els-cdn.com/S0306456516300158/1-s2.0-S0306456516300158-main.pdf?_tid=ed0711a2-d520-11e7-b392-00000aab0f26&acdnat=1511972493_b02c02e0a7c38e3d9f72adeceb904da2	humans	Humans/Medical	y	y	0.98	Bernard et al 2013	https://www.sciencedirect.com/science/article/pii/S112017971200186X	59	n	n/a	n/a	y	59	y	59	y	59	NEC	AVIO TVS-700	59
1001	Jocob et al	2016	BRAZILIAN JOURNAL OF POULTRY SCIENCE	18	3	357	http://www.scielo.br/pdf/rbca/v18n3/1516-635X-rbca-18-03-00357.pdf	chicken	Birds and Poultry	y	y	0.98	Alves et al 2012; Cangar et al 2008	http://www.scielo.br/scielo.php?pid=S1516-635X2012000300010&script=sci_arttext ; https://watermark.silverchair.com/poultrysci87-2493.pdf?token=AQECAHi208BE49Ooan9kkhW_Ercy7Dm3ZL_9Cf3qfKAc485ysgAAAcIwggG-BgkqhkiG9w0BBwagggGvMIIBqwIBADCCAaQGCSqGSIb3DQEHATAeBglghkgBZQMEAS4wEQQM7TNK3pR3nlA6LHJCAgEQgIIBdUnqokeDDuH3vUA75HD4jBkOkcqgJQAMxylI32MTWV7MkmcoFWuKaZd3oAbZSj5tpViA4wy4bHhsYIH1mvRGK-BN_F5RUw-y7Sgm…	358	y	assumed to be ambient	358	y	358	n	n/a	y	358	Testo	882	358
1002	Alves et al	2016	THERIOGENOLOGY	86	3	795	https://ac.els-cdn.com/S0093691X16001060/1-s2.0-S0093691X16001060-main.pdf?_tid=0a94a4b6-d5c9-11e7-be3f-00000aab0f6b&acdnat=1512044690_f3a01fc352ffe4405f6051c63a8b1872	bulls	Agricultural Animals	y	y	0.98	n	n/a	797	n	n/a	n/a	y	797	y	797	y	797	FLIR	T620	797
1004	Cross et al	2016	ECOLOGY	97	8	1938	http://ro.uow.edu.au/cgi/viewcontent.cgi?article=5114&context=smhpapers	wolves	Mammals	y	y	0.99	n	n/a	1940	y	assumed to be ambient	1940	y	1939	y	1940	y	1939	FLIR	SC8340 & VarioCAM	1939
1006	Malmkvist et al	2016	APPLIED ANIMAL BEHAVIOUR SCIENCE	181		152	https://ac.els-cdn.com/S0168159116301757/1-s2.0-S0168159116301757-main.pdf?_tid=773421da-d5cb-11e7-843c-00000aacb361&acdnat=1512045732_127bbe60627cd358ad861186ee973d36	minks	Mammals	y	y	0.98	Soerensen et al 2014	https://ac.els-cdn.com/S0168169914002178/1-s2.0-S0168169914002178-main.pdf?_tid=0e9f7f6a-d5cc-11e7-aba6-00000aab0f27&acdnat=1512045995_baa96d531ea235ed74101516e1ca8ce1	154	y	assumed to be ambient	153	y	154	n	n/a	y	153	FLIR	P660	153
1007	Adamczyk et al	2016	JOURNAL OF THERMAL BIOLOGY	60		20	https://ac.els-cdn.com/S0306456516300146/1-s2.0-S0306456516300146-main.pdf?_tid=444c4a6c-d5cc-11e7-8996-00000aacb360&acdnat=1512046076_8e21563b1f666167e33177ea17547258	human skin	Humans/Medical	y	n	n/a	n/a	n/a	n/a	n	n/a	n/a	n	n/a	n	n/a	y	21	FLIR	A325	21
1008	Lunghi et al	2016	JOURNAL OF THERMAL BIOLOGY	60		79	https://ac.els-cdn.com/S030645651630064X/1-s2.0-S030645651630064X-main.pdf?_tid=e66e5c2c-d5cc-11e7-97ce-00000aacb35d&acdnat=1512046348_d3985f4e5ddac7748a718fe8e6f89337	salamanders	Reptiles and Amphibians	y	y	0.98	n	n/a	80	n	n/a	n/a	y	80	n	n/a	y	80	Fluke	Ti32	80
1009	Al-Noori et al	2016	JOURNAL OF THERMAL BIOLOGY	60		195	https://ac.els-cdn.com/S0306456516301048/1-s2.0-S0306456516301048-main.pdf?_tid=abdafcf4-d5cd-11e7-a014-00000aab0f26&acdnat=1512046679_5e266fbd43f528573ef59edf719ba408	rats	Mammals	y	y	0.98	n	n/a	196	n	n/a	n/a	y	196	n	n/a	n	n/a	FLIR	A325sc	196
1010	Games et al	2016	AEROSPACE MEDICINE AND HUMAN PERFORMANCE	87	8	697	saved	humans	Humans/Medical	y	n	n/a	n/a	n/a	n/a	n	n/a	n/a	n	n/a	n	n/a	y	3	FLIR	T420	3
1011	Gerasimova-Chechkina et al	2016	FRONTIERS IN PHYSIOLOGY	7		336	https://www.frontiersin.org/articles/10.3389/fphys.2016.00336/full	human skin	Humans/Medical	y	n	n/a	n/a	n/a	n/a	n	n/a	n/a	y	4	n	n/a	y	4	FLIR	InSb photovoltaic detector	4
1013	Seidel et al	2016	FRONTIERS IN PLANT SCIENCE	7		1247	https://www.ncbi.nlm.nih.gov/pmc/articles/PMC5005371/pdf/fpls-07-01247.pdf	vegetation	Plants	y	y	0.9 to 0.95	measured	thermocouple reference	5	n	n/a	n/a	y	5	y	5	y	5	Infratec	VarioCam hr inspect 780	5
1014	Dotti et al	2016	APPLIED ERGONOMICS	56		144	https://ac.els-cdn.com/S0003687016300667/1-s2.0-S0003687016300667-main.pdf?_tid=bcc1f92e-d5d1-11e7-be48-00000aacb360&acdnat=1512048433_064c36b0a29c43620ad24f271f37941e	humans	Humans/Medical	y	n	n/a	n/a	n/a	n/a	n	n/a	n/a	y	145	y	145	n	n/a	NEC	Thermo Tracer TH9100MW	146
1016	Lathlean et al	2016	MARINE BIOLOGY	163	9	189	https://link.springer.com/content/pdf/10.1007%2Fs00227-016-2966-z.pdf	mussels	Other	y	n	n/a	n/a	n/a	n/a	n	n/a	n/a	n	n/a	n	n/a	n	n/a	Fluke	Ti25	189
1017	Familoni et al	2016	PSYCHOPHYSIOLOGY	53	9	1417	http://onlinelibrary.wiley.com/doi/10.1111/psyp.12681/epdf	humans	Humans/Medical	y	n	n/a	n/a	n/a	n/a	n	n/a	n/a	y	1419	n	n/a	y	1419	FLIR	SC5600	1419
1018	Michelotto et al	2016	JOURNAL OF EQUINE VETERINARY SCIENCE	44		37	https://ac.els-cdn.com/S0737080615300228/1-s2.0-S0737080615300228-main.pdf?_tid=e6327ede-d5d4-11e7-a1a7-00000aab0f6b&acdnat=1512049791_c1d66e88aa513ffb0b5298b3c084777a	horses	Agricultural Animals	y	n	n/a	n/a	n/a	n/a	n	n/a	n/a	n	n/a	n	n/a	y	38	FLIR	ThermaCAM i40	38
1019	Sapkota et al	2016	LIVESTOCK SCIENCE	191		143	https://ac.els-cdn.com/S1871141316301524/1-s2.0-S1871141316301524-main.pdf?_tid=82400e2c-d5d5-11e7-8185-00000aab0f01&acdnat=1512050053_ebe89b7d7e5d936e93d0077b08a85ca8	pigs	Agricultural Animals	y	y	1	n	n/a	144	n	n/a	n/a	y	144	y	144	y	144	FLIR	T62101	144
1020	de Sousa et al	2016	COMPUTERS AND ELECTRONICS IN AGRICULTURE	127		176	https://ac.els-cdn.com/S0168169916303933/1-s2.0-S0168169916303933-main.pdf?_tid=53b8e186-d5d6-11e7-88bf-00000aacb35d&acdnat=1512050397_f72f2752aa7a87ee425b01d389be2a95	cattle	Agricultural Animals	y	y	0.98	n	n/a	178	n	n/a	n/a	y	178	y	178	y	178	Fluke	Ti 20-9Hz	178
1021	Cortivo et al	2016	COMPUTERS AND ELECTRONICS IN AGRICULTURE	127		413	https://ac.els-cdn.com/S0168169916304653/1-s2.0-S0168169916304653-main.pdf?_tid=fca34340-d5d6-11e7-a085-00000aab0f01&acdnat=1512050680_2b51fc46cf07e2793d1dae8477e60ef3	cattle	Agricultural Animals	y	y	0.98	manufacturer	n/a	414	n	n/a	n/a	y	414	y	414	y	414	FLIR	T300	414
1023	Guo et al	2016	FIELD CROPS RESEARCH	196		463	https://ac.els-cdn.com/S0378429016302635/1-s2.0-S0378429016302635-main.pdf?_tid=3d01fd94-d5e8-11e7-9ac5-00000aab0f6c&acdnat=1512058089_b0f6a20c1ca557318d4afae0ac4f75c6	vegetation	Plants	y	y	0.95	n	n/a	465	n	n/a	n/a	n	n/a	n	n/a	y	465	FLIR	SC620	465
1024	Hoffmann et al	2016	ANIMAL	10	9	1542	https://www.cambridge.org/core/services/aop-cambridge-core/content/view/6663A88F080F18A95D51501974A0F600/S1751731115001354a.pdf/div-class-title-first-investigations-to-refine-video-based-ir-thermography-as-a-non-invasive-tool-to-monitor-the-body-temperature-of-calves-div.pdf	cattle	Agricultural Animals	y	y	0.985	Wolfe & Zissis 1985	https://scholar.google.co.uk/scholar?hl=en&as_sdt=0%2C5&q=Wolfe+WL+and+Zissis+GJ+1985.+The+infrared+handbook%2C+revised+edition.+General+Dynamics%2C+Office+of+Naval+Research%2C+Department+of+Navy%2C+Washington%2C+DC.&btnG=	1543	y	assumed to be ambient	1543	y	1543	y	1543	y	1543	OPTRIS	PI450	1543
1026	Jin et al	2016	ASIAN HERPETOLOGICAL RESEARCH	7	3	210	saved	lizards	Reptiles and Amphibians	y	n	n/a	n/a	n/a	n/a	n	n/a	n/a	y	212	n	n/a	n	n/a	Testo	890-1	212
1029	Soroko et al	2016	JOURNAL OF EQUINE VETERINARY SCIENCE	45		39	https://ac.els-cdn.com/S0737080616301265/1-s2.0-S0737080616301265-main.pdf?_tid=c5503b96-d5ea-11e7-bb69-00000aab0f01&acdnat=1512059177_d9fa33474bc3cde431cc7009b02c2771	horses	Agricultural Animals	y	y	1	n	n/a	40	n	n/a	n/a	n	n/a	n	n/a	y	40	InfraTec	VarioCAM hr	40
1030	Loyau et al	2016	ANIMAL	10	10	1594	https://www.cambridge.org/core/services/aop-cambridge-core/content/view/3F244F8CC386496E615962C9A7A88F48/S1751731116000616a.pdf/heritability_of_body_surface_temperature_in_hens_estimated_by_infrared_thermography_at_normal_or_hot_temperatures_and_genetic_correlations_with_egg_and_feather_quality.pdf	chickens	Birds and Poultry	y	y	0.896-0.98	n	n/a	1596	y	assumed to be ambient	1596	y	1596	y	1596	n	n/a	FLIR	B335	1595
1032	Sasaki et al	2016	JARQ-JAPAN AGRICULTURAL RESEARCH QUARTERLY	50	4	361	https://www.jstage.jst.go.jp/article/jarq/50/4/50_361/_pdf	pigs	Agricultural Animals	y	n	n/a	n/a	n/a	n/a	n	n/a	n/a	n	n/a	n	n/a	y	362	NEC	Thermo Shot F30	362
1033	Codde et al	2016	JOURNAL OF THERMAL BIOLOGY	61		98	https://ac.els-cdn.com/S0306456516301255/1-s2.0-S0306456516301255-main.pdf?_tid=19df28dc-d5ed-11e7-a8ee-00000aacb35d&acdnat=1512060178_bb0a747625fa734cb9b002b20762485b	seals	Mammals	y	y	0.98	Cuyler et al 1992 ; Norris et al 2010	http://onlinelibrary.wiley.com/doi/10.1111/j.1748-7692.1992.tb00371.x/full ; http://onlinelibrary.wiley.com/doi/10.1111/j.1748-7692.1992.tb00371.x/pdf	100	y	ambient	100	y	100	y	100	y	100	FLIR	b2	100
1034	Jo & Kim	2016	JOURNAL OF THERMAL BIOLOGY	62		133	https://ac.els-cdn.com/S0306456516301401/1-s2.0-S0306456516301401-main.pdf?_tid=2dd7f7dc-d5ee-11e7-8a2c-00000aacb35f&acdnat=1512060641_e65a95512424c6c7e0254d4876c65e53	human	Humans/Medical	y	y	0.98	n	n/a	134	n	n/a	n/a	y	135	y	135	y	135	L3 Communications holdings	L3 communications	134
1037	Digiovani et al	2016	BRAZILIAN JOURNAL OF HYGIENE AND ANIMAL SANITY	10	4	685	https://scholar.google.com/scholar_lookup?doi=10%2E5935%2F1981-2965%2E20160055&issn=1981-2965&issue=4&journal=BRAZILIAN%20JOURNAL%20OF%20HYGIENE%20AND%20ANIMAL%20SANITY&hl=en&pages=685-692&title=Infrared%20thermography%20as%20diagnostic%20tool%20for%20bovine%20subclinical%20mastitis%20detection&author=D%20Digiovani&publication_year=2016&volume=10	cows	Agricultural Animals	y	y	0.97	n	n/a	687	n	n/a	n/a	y	687	y	687	y	687	FLIR	T440	687
1038	Maes et al	2016	AGRICULTURAL AND FOREST METEOROLOGY	226		119	https://ac.els-cdn.com/S0168192316302854/1-s2.0-S0168192316302854-main.pdf?_tid=19d61ffa-d5f0-11e7-adf7-00000aab0f01&acdnat=1512061466_b6b8498185595cb2608a24e3960d6cd7	vegetation	Plants	y	y	0.98	Lopez et al 2012	https://ac.els-cdn.com/S0304423812000428/1-s2.0-S0304423812000428-main.pdf?_tid=91f8743e-c0aa-11e7-9c09-00000aacb35d&acdnat=1509722628_85fb02f2ab04c98279cae8b940b14dbb	122	y	not given	122	y	122	y	122	y	122	FLIR	SC305	122
1039	Kim et al	2016	AGRICULTURAL AND FOREST METEOROLOGY	226		161	https://ac.els-cdn.com/S0168192316302982/1-s2.0-S0168192316302982-main.pdf?_tid=ccbefc4a-d5f0-11e7-be40-00000aab0f6b&acdnat=1512061766_0dd71da66af5a827cb8fa1c76a33b464	vegetation	Plants	y	y	0.95	n	n/a	164	y	not given	164	y	164	y	163	y	164	FLIR	A325sc	164
1041	Han et al	2016	AGRICULTURAL WATER MANAGEMENT	177		400	https://ac.els-cdn.com/S0378377416303250/1-s2.0-S0378377416303250-main.pdf?_tid=8569a4b4-d67f-11e7-b0c5-00000aacb35d&acdnat=1512123065_379020135cd3ec4aad72b8ba556bb4a4	vegetation	Plants	y	n	n/a	n/a	n/a	402	y	background?	402	y	402	y	402	y	402	FLIR	A655sc	402
1042	Kohler et al	2016	JOURNAL OF DAIRY SCIENCE	99	11	9080	https://ac.els-cdn.com/S002203021630577X/1-s2.0-S002203021630577X-main.pdf?_tid=4c3ecb46-d680-11e7-894e-00000aab0f6b&acdnat=1512123406_c226be55562d377a460a95b3f163306c	cattle	Agricultural Animals	y	y	0.95	n	n/a	9083	n	n/a	n/a	y	9083	n	n/a	y	9083	Fluke	Ti200	9083
1043	Torres et al	2016	SCIENTIA HORTICULTURAE	211		336	https://ac.els-cdn.com/S0304423816304630/1-s2.0-S0304423816304630-main.pdf?_tid=1e1e8548-d681-11e7-9877-00000aab0f27&acdnat=1512123750_65fef43ad2df3576e9fd3bbbbe815e0e	fruit	Plants	y	y	0.96	n	n/a	337	n	n/a	n/a	y	338	y	337	n	n/a	FLIR	E40	337
1044	Menegassi et al	2016	INTERNATIONAL JOURNAL OF BIOMETEOROLOGY	60	11	1787	https://link.springer.com/content/pdf/10.1007%2Fs00484-016-1167-2.pdf	bulls	Agricultural Animals	y	n	n/a	n/a	n/a	n/a	n	n/a	n/a	y	1789	y	1789	y	1790	FLIR	T300	1790
1050	Narvaez et al	2016	BIOSYSTEMS ENGINEERING	151		479	https://ac.els-cdn.com/S1537511016300563/1-s2.0-S1537511016300563-main.pdf?_tid=d9c0cfb0-d68e-11e7-a6e0-00000aacb35e&acdnat=1512129649_96e5900fd6b390efd8600fa932f68219	vegetation	Plants	y	n	n/a	n/a	n/a	n/a	n	n/a	n/a	n	n/a	n	n/a	n	n/a	Fluke	Ti400	483
1053	Aubrecht et al	2016	AGRICULTURAL AND FOREST METEOROLOGY	228		315	https://ac.els-cdn.com/S0168192316303434/1-s2.0-S0168192316303434-main.pdf?_tid=c290fd50-d694-11e7-ae5f-00000aab0f6c&acdnat=1512132195_483205eb6b0d6e89f576cd9fc1b08e77	vegetation	Plants	y	y	0.8-0.99	n	n/a	317	y		317	y	317	y	317	y	316	FLIR	A655sc	316
1054	Chacur et al	2016	ACTA SCIENTIAE VETERINARIAE	44		1412	https://www.cabdirect.org/cabdirect/FullTextPDF/2017/20173094200.pdf	cattle	Agricultural Animals	y	n	n/a	n/a	n/a	n/a	y	assumed to be ambient	2	y	2	y	2	y	2	FLIR	model unknown	2
1055	Gomez-Candon et al	2016	PRECISION AGRICULTURE	17	6	786	https://link.springer.com/content/pdf/10.1007%2Fs11119-016-9449-6.pdf	vegetation	Plants	y	n	n/a	n/a	n/a	n/a	n	n/a	n/a	y	790	y	790	y	791	Miricle	Thermoteknix Miricle 307K	790
1056	Riemer et al	2016	PHYSIOLOGY & BEHAVIOR	167		86	https://ac.els-cdn.com/S0031938416306680/1-s2.0-S0031938416306680-main.pdf?_tid=34cf2200-d697-11e7-be00-00000aab0f27&acdnat=1512133237_d7e70071fde96cb6b903d5826abea798	dogs	Mammals	y	n	n/a	n/a	n/a	n/a	n	n/a	n/a	n	n/a	n	n/a	y	87	FLIR	T420	87
1058	El Hadi et al	2016	PHYSIOLOGICAL MEASUREMENT	37	12		http://iopscience.iop.org/article/10.1088/0967-3334/37/12/N118/pdf	humans	Humans/Medical	y	n	n/a	n/a	n/a	n/a	n	n/a	n/a	y	n120	n	n/a	y	n121	FLIR	T450sc	n121
1060	Jiao et al	2016	JOURNAL OF THERMAL BIOLOGY	62		15	https://ac.els-cdn.com/S0306456516301383/1-s2.0-S0306456516301383-main.pdf?_tid=380d4198-d699-11e7-8ee4-00000aab0f6c&acdnat=1512134102_52c5fdcc048ce29b5e87a6775c27126b	pig	Agricultural Animals	y	y	0.96	n	n/a	16	n	n/a	n/a	y	16	y	16	y	16	FLIR	SC620	16
1061	Fernandes et al	2016	JOURNAL OF THERMAL BIOLOGY	62		50	https://ac.els-cdn.com/S0306456516302091/1-s2.0-S0306456516302091-main.pdf?_tid=a62c28ec-d699-11e7-a486-00000aab0f02&acdnat=1512134286_0d4193e9b5da2d40bdc9d363db991c0a	human	Humans/Medical	y	y	0.98	Lahiri et al 2012 ; Ring & Ammer 2012	http://www.sciencedirect.com/science/article/pii/S1350449512000308#s0015 ; http://iopscience.iop.org/article/10.1088/0967-3334/33/3/R33/pdf	52	y	something sensible, 25	52	y	51	y	51	y	52	FLIR	T420	52
1062	Salles et al	2016	JOURNAL OF THERMAL BIOLOGY	62		63	https://ac.els-cdn.com/S0306456516301516/1-s2.0-S0306456516301516-main.pdf?_tid=b62a99ee-d69a-11e7-9732-00000aacb362&acdnat=1512134743_cc39dc5997a8994f1bd5a6781617f6cd	cattle	Agricultural Animals	y	y	0.98	n	n/a	65	n	n/a	n/a	y	65	y	65	y	65	Fluke	Ti20TM	65
1063	Barroso et al	2016	JOURNAL OF THERMAL BIOLOGY	62		90	https://ac.els-cdn.com/S0306456516300766/1-s2.0-S0306456516300766-main.pdf?_tid=1347928c-d6ad-11e7-8afe-00000aab0f27&acdnat=1512142630_cc79309849b985a4e92b7a49020bfd86	lizards	Reptiles and Amphibians	y	y	0.96	n	n/a	91	y	assumed to be ambient	91	y	91	n	n/a	y	91	FLIR	T335	91
1064	Kim et al	2016	Plant Pathology Journal	32	6	563	https://www.ncbi.nlm.nih.gov/pmc/articles/PMC5117865/	vegetation and mould?	Plants	y	n	n/a	n/a	n/a	n/a	n	n/a	n/a	y	564	n	n/a	y	564	FLIR	T620	564
1066	Warner et al	2016	AMERICAN JOURNAL OF PHYSIOLOGY-ENDOCRINOLOGY AND METABOLISM	311	6	E901	https://www.physiology.org/doi/abs/10.1152/ajpendo.00204.2016	rats	Mammals	y	n	n/a	n/a	n/a	n/a	n	n/a	n/a	y	E901	n	n/a	y	E902	NEC	TH9100	E902
1070	Pereira et al	2016	JOURNAL OF THERMAL BIOLOGY	62		159	https://ac.els-cdn.com/S0306456516300286/1-s2.0-S0306456516300286-main.pdf?_tid=6c52173c-d6b0-11e7-8ee5-00000aab0f27&acdnat=1512144068_cedff4e88244db23b009b01502f62b6b	humans	Humans/Medical	y	n	n/a	n/a	n/a	n/a	y	assumed to be ambient	166	y	166	y	166	n	n/a	InfraTec	VarioCAM HD head	166
1072	Perazzi et al	2016	LARGE ANIMAL REVIEW	22	6	281	https://www.cabdirect.org/cabdirect/FullTextPDF/2017/20173048553.pdf	goat	Agricultural Animals	y	n	n/a	n/a	n/a	n/a	n	n/a	n/a	n	n/a	n	n/a	n	n/a	n	n	n/a
1073	Sathiyabarathi et al	2016	VETERINARY WORLD	9	12	1386	https://www.ncbi.nlm.nih.gov/pmc/articles/PMC5234052/pdf/VetWorld-9-1386.pdf	cattle	Agricultural Animals	y	y	0.98	n	n/a	1387	y	something sensible	1387	y	1387	n	n/a	y	1387	FLIR	I5	1386
1074	Deery et al	2016	Frontiers in Plant Science	7		1808	https://www.ncbi.nlm.nih.gov/pmc/articles/PMC5138222/pdf/fpls-07-01808.pdf	vegetation	Plants	y	n	n/a	n/a	n/a	n/a	n	n/a	n/a	y	3	y	3	y	3	FLIR	SC645	3
1076	Macdonald et al	2017	PHYSIOLOGICAL MEASUREMENT	38	1	33	http://iopscience.iop.org/article/10.1088/1361-6579/38/1/33/pdf	humans	Humans/Medical	y	n	n/a	n/a	n/a	n/a	n	n/a	n/a	y	35	y	35	n	n/a	Micro Epsilon	TIM 400	35
1077	Barkla & Rhodes	2017	FUNCTIONAL PLANT BIOLOGY	44	1	46	saved	plants	Plants	y	y	0.98	n	n/a	B	n	n/a	n/a	y	B	n	n/a	y	B	Industrial precision Instraments	EasIR-4	B
1079	Wedeking et al	2017	FUNCTIONAL PLANT BIOLOGY	44	1	119	saved	plants	Plants	y	n	n/a	n/a	n/a	n/a	n	n/a	n/a	y	B	y	B	y	B	InfraTec	VarioScan 3021 ST	D
1080	Virlet et al	2017	FUNCTIONAL PLANT BIOLOGY	44	1	143	http://www.publish.csiro.au/fp/pdf/FP16163	vegetation	Plants	y	n	n/a	n/a	n/a	n/a	n	n/a	n/a	y	fig 8?	y	fig 8?	y	146	FLIR	A645SC	145
1082	Thompson et al	2017	JOURNAL OF THERMAL BIOLOGY	63		49	https://ac.els-cdn.com/S0306456516302182/1-s2.0-S0306456516302182-main.pdf?_tid=88b83710-d6b7-11e7-82c2-00000aacb362&acdnat=1512147122_988947f8ca0347009ba843a215bfad2e	primates	Mammals	y	y	0.98	Steketee 1973	http://iopscience.iop.org/article/10.1088/0031-9155/18/5/307/pdf	51	y	crumpled foil mirror	51	y	50	y	50	y	51	FLIR	E60bx	51
1083	Scheffers et al	2017	BIOTROPICA	49	1	35	http://onlinelibrary.wiley.com/doi/10.1111/btp.12355/epdf	vegetation	Plants	y	y	0.95	Snyder et al 1998	http://www.tandfonline.com/doi/pdf/10.1080/014311698214497; http://www.sciencedirect.com/science/article/pii/S0304423812000428	36	n	n/a	n/a	y	37	y	37	y	36	FLIR	E6, E40	36
1094	Yadav et al	2017	INDIAN JOURNAL OF DAIRY SCIENCE	70	4	462	https://scholar.google.com/scholar_lookup?author=S%20Yadav&atitle=Relationship%20among%20testicular,%20physical%20and%20semen%20quality%20parameters%20of%20Murrah%20buffalo%20breeding%20bulls&publication_year=2017&hl=en&journal=INDIAN%20JOURNAL%20OF%20DAIRY%20SCIENCE&volume=70&issue=4&pages=462-465&issn=0019-5146	cattle	Agricultural Animals	y	n	n/a	n/a	n/a	n/a	n	n/a	n/a	y	463	y	463	y	463	FLIR	i7	463
1095	Urrestarazu et al	2017	COMMUNICATIONS IN SOIL SCIENCE AND PLANT ANALYSIS	48	13	1595	http://www.tandfonline.com/doi/abs/10.1080/00103624.2017.1374399?needAccess=true#aHR0cDovL3d3dy50YW5kZm9ubGluZS5jb20vZG9pL3BkZi8xMC4xMDgwLzAwMTAzNjI0LjIwMTcuMTM3NDM5OT9uZWVkQWNjZXNzPXRydWVAQEAw	vegetation	Plants	y	n	n/a	n/a	n/a	n/a	n	n/a	n/a	y	1596	n	n/a	n	n/a	Fluke	TiS	1596
1096	Montesinos-Lopez et al	2017	PLANT METHODS	13		4	https://plantmethods.biomedcentral.com/track/pdf/10.1186/s13007-016-0154-2?site=plantmethods.biomedcentral.com	wheat	Plants	n	n	n/a	n/a	n/a	n/a	n	n/a	n/a	n	n/a	n	n/a	y	3	FLIR	A600	3
1097	Martinez et al	2017	PRECISION AGRICULTURE	18	1	95	https://link.springer.com/content/pdf/10.1007%2Fs11119-016-9470-9.pdf	vegetation	Plants	y	y	0.98	Lopez et al 2012	https://ac.els-cdn.com/S0304423812000428/1-s2.0-S0304423812000428-main.pdf?_tid=91f8743e-c0aa-11e7-9c09-00000aacb35d&acdnat=1509722628_85fb02f2ab04c98279cae8b940b14dbb	99	n	n/a	n/a	y	102	y	102	y	102	FLIR	Tau 2 324	100
1098	Leigh et al	2017	PLANT CELL AND ENVIRONMENT	40	2	237	http://onlinelibrary.wiley.com/doi/10.1111/pce.12857/epdf	vegetation	Plants	y	y	0.95	Monteith & Unsworth 1990	http://denning.atmos.colostate.edu/readings/Monteith.and.Unsworth.4thEd.pdf	238	n	n/a	n/a	y	238	y	238	y	239	FLIR	SC2000	238
1099	Mercer-Bowyer et al	2017	JAVMA-JOURNAL OF THE AMERICAN VETERINARY MEDICAL ASSOCIATION	250	3	316	https://avmajournals.avma.org/doi/pdf/10.2460/javma.250.3.316	horses	Agricultural Animals	y	n	n/a	n/a	n/a	n/a	y	assumed to be ambient	318	y	318	y	318	y	318	FLIR	T6210	320
1100	Sagaidachnyi et al	2017	PHYSIOLOGICAL MEASUREMENT	38	2	272	http://iopscience.iop.org/article/10.1088/1361-6579/aa4eaf/pdf	human	Humans/Medical	y	n	n/a	n/a	n/a	n/a	n	n/a	n/a	y	274	n	n/a	n	n/a	FLIR	SC3000	280
1101	Byrne et al	2017	JOURNAL OF ANIMAL SCIENCE	95	2	970	https://academic.oup.com/jas/article/95/2/970/4702112	cow	Agricultural Animals	y	y	0.98	n	n/a	972	y	not said	972	y	972	y	972	y	971	FLIR	T430sc	971
1102	Barbedo et al	2017	VETERINARY PARASITOLOGY	235		106	https://ac.els-cdn.com/S0304401717300304/1-s2.0-S0304401717300304-main.pdf?_tid=b63849ac-d9ad-11e7-bcdf-00000aacb361&acdnat=1512472757_4f5bee8ea3e348cbe350183ce51de1ae	cattle with ticks	Agricultural Animals	y	y	0.98	n	n/a	107	y	assumed to be ambient	107	y	107	y	107	y	107	FLIR	T300	107
1103	Caldwell et al	2017	JAVMA-JOURNAL OF THE AMERICAN VETERINARY MEDICAL ASSOCIATION	250	5	554	https://avmajournals.avma.org/doi/pdf/10.2460/javma.250.5.554	cattle	Agricultural Animals	y	n	n/a	n/a	n/a	n/a	n	n/a	n/a	y	555	n	n/a	y	555	FLIR	T430	559
1104	Albaladejo et al	2017	ENVIRONMENTAL AND EXPERIMENTAL BOTANY	135		1	https://ac.els-cdn.com/S0098847216302520/1-s2.0-S0098847216302520-main.pdf?_tid=7edd8f06-d9af-11e7-86e8-00000aab0f26&acdnat=1512473523_c8fe8aeb7798e6e79b8222ac95b8fe01	tomato	Plants	y	y	0.95	n	n/a	3	y	something sensible	3	n	n/a	n	n/a	y	3	FLIR	T420BX	3
1106	Lee et al	2017	JOURNAL OF BIOPHOTONICS	10	3	433	http://onlinelibrary.wiley.com/doi/10.1002/jbio.201500333/epdf	cattle teeth	Agricultural Animals	y	y	0.92	n	n/a	439	y	assumed to be ambient	437	y	439	y	439	n	n/a	FLIR	A65	439
1109	Al Masri et al	2017	EUROPEAN JOURNAL OF PLANT PATHOLOGY	147	4	855	https://link.springer.com/content/pdf/10.1007%2Fs10658-016-1051-2.pdf	wheat	Plants	y	y	1	n	n/a	857	n	n/a	n/a	y	857	y	857	y	857	Jenoptik	VarioCAM head hr	857
1110	Pichova et al	2017	ANIMAL	11	4	661	https://www.cambridge.org/core/services/aop-cambridge-core/content/view/C79E712E1D9C4FBD0E28A83A46A36A36/S1751731116001981a.pdf/assessment_of_the_effect_of_housing_on_feather_damage_in_laying_hens_using_ir_thermography.pdf	chickens	Birds and Poultry	y	y	0.95	Cangar et al 2008; Naas et al 2010	https://watermark.silverchair.com/poultrysci87-2493.pdf?token=AQECAHi208BE49Ooan9kkhW_Ercy7Dm3ZL_9Cf3qfKAc485ysgAAAdowggHWBgkqhkiG9w0BBwagggHHMIIBwwIBADCCAbwGCSqGSIb3DQEHATAeBglghkgBZQMEAS4wEQQMXscxzSQZ8nSPiHHmAgEQgIIBjbP-jUQPiZDm0lARZjvLNrv6rzhPmuAt8JlNS2gUY30uiWdZTNCup6SzLrLs4v2GRzdw945zwXmH7zXRUOUxf8OwAKDemBRC5YSFG1CPChbRA0s5a8pVTANVhEmNZ8VBKT6Px8OSZhhuIwQ57jdoQdIjoOzTIgFvNk1Hq_sosp3dmPfPRJPcd…	662	n	n/a	n/a	y	668	y	668	y	662	FLIR	E5	662
1113	Huang et al	2017	HOLZFORSCHUNG	71	4	349	http://eprints.whiterose.ac.uk/124955/1/Thermal%20diffusivity%20measurement%20of%20Phyllostachys%20edulis%20%28Moso%20bamboo%29%20by%20flash%20method.pdf	plant	Plants	y	n	n/a	n/a	n/a	n/a	n	n/a	n/a	n	n/a	n	n/a	n	n/a	n	n	n/a
1114	Hammerle et al	2017	INTERNATIONAL JOURNAL OF BIOMETEOROLOGY	61	4	575	https://link.springer.com/content/pdf/10.1007%2Fs00484-016-1234-8.pdf	ground	Earth and Soil	y	y	1	n	n/a	577	n	n/a	n/a	y	577	y	577	n	n/a	Jenoptik	VarioCAM	578
1115	Foster & Ijichi	2017	APPLIED ANIMAL BEHAVIOUR SCIENCE	189		79	https://ac.els-cdn.com/S0168159117300096/1-s2.0-S0168159117300096-main.pdf?_tid=5c9706c2-d9b7-11e7-bab6-00000aacb362&acdnat=1512476902_9b4f3cb76a6b4a4427ef18228aaff8b7	cats	Mammals	y	n	n/a	n/a	n/a	n/a	n	n/a	n/a	n	n/a	n	n/a	y	81	FLIR	E5	81
1116	Goff et al	2017	CRYOBIOLOGY	75		125	https://ac.els-cdn.com/S0011224016301353/1-s2.0-S0011224016301353-main.pdf?_tid=f2a2fdf6-d9b7-11e7-a119-00000aacb35f&acdnat=1512477153_bbdbdab8511026b767deae9afd7f34b4	organs	Humans/Medical	y	n	n/a	thermocouple	n/a	126	n	n/a	n/a	n	n/a	n	n/a	n	n/a	n	n	n/a
1117	Villa-Rojas et al	2017	BIOSYSTEMS ENGINEERING	156		7	https://ac.els-cdn.com/S153751101530386X/1-s2.0-S153751101530386X-main.pdf?_tid=15c15408-d9b9-11e7-89a3-00000aab0f01&acdnat=1512477642_70e716909a95a5940f37ad48b7536a63	bacteria and flour	Other	y	n	n/a	n/a	n/a	n/a	n	n/a	n/a	y	throughout	y	throughout	n	n/a	FLIR	CAMTM SC-3000	8
1118	Seixas et al	2017	ASIAN-AUSTRALASIAN JOURNAL OF ANIMAL SCIENCES	30	4	593	https://www.ncbi.nlm.nih.gov/pmc/articles/PMC5394847/pdf/ajas-30-4-593.pdf	sheep	Agricultural Animals	y	y	0.95	n	n/a	594	n	n/a	n/a	y	594	y	594	y	594	FLIR	ThermaCAM model unkown	594
1120	Murakami et al	2017	SCIENTIA HORTICULTURAE	218		1	https://ac.els-cdn.com/S0304423817300961/1-s2.0-S0304423817300961-main.pdf?_tid=5d3aff1c-d9bb-11e7-9807-00000aacb35f&acdnat=1512478621_00c9ac8eae5c7c1c810340453421c549	plants	Plants	y	n	n/a	n/a	n/a	n/a	n	n/a	n/a	y	2	n	n/a	n	n/a	NEC	R300	2
1121	Lerkvaleekul et al	2017	PHYSIOLOGICAL MEASUREMENT	38	5	691	http://iopscience.iop.org/article/10.1088/1361-6579/aa63d8/pdf	human	Humans/Medical	y	y	0.98	n	n/a	693	y	assumed to be ambient	693	y	693	y	693	n	n/a	FLIR	E60	693
1122	Schraft & Clark	2017	PHYSIOLOGY & BEHAVIOR	178		174	https://ac.els-cdn.com/S003193841631157X/1-s2.0-S003193841631157X-main.pdf?_tid=6c268502-d9c8-11e7-91e9-00000aacb35e&acdnat=1512484229_2226aa071300a9aaf9ffe39735980e65	rats	Mammals	y	y	0.95	Speakman & Ward 1998 ; Tattersall et al 2004	https://abdn.pure.elsevier.com/en/publications/infrared-thermography-principles-and-applications ; http://www.rc.unesp.br/ib/zoologia/denis/reprints%20-%20pdf/Thermogenesis.pdf	175	n	n/a	n/a	n	n/a	n	n/a	y	175	FLIR	T-420	175
1123	Ang et al	2017	JOURNAL OF PHYSIOLOGICAL SCIENCES	67	3	395	https://link.springer.com/content/pdf/10.1007%2Fs12576-016-0472-1.pdf	humans	Humans/Medical	y	y	0.98	n	n/a	397	y	assumed to be ambient	398	y	398	n	n/a	y	397	FLIR	T440	398
1124	Stewart et al	2017	JOURNAL OF DAIRY SCIENCE	100	5	3893	https://ac.els-cdn.com/S0022030217301881/1-s2.0-S0022030217301881-main.pdf?_tid=f48da642-d9e0-11e7-baef-00000aacb35d&acdnat=1512494775_2630a1b05bc6084b223ec25d90fbec3c	cattle	Agricultural Animals	y	y	0.98	n	n/a	3895	y	assumed to be ambient	3895	y	3895	y	3895	y	3895	FLIR	S60	3895
1125	Snoek et al	2017	COMPUTERS AND ELECTRONICS IN AGRICULTURE	137		23	https://ac.els-cdn.com/S0168169916301338/1-s2.0-S0168169916301338-main.pdf?_tid=7c915570-d9e1-11e7-820b-00000aab0f27&acdnat=1512494994_8fab78813695b3ae449ffe9a93fb6c97	cow urine puddle	Agricultural Animals	y	y	0.96	manufacturer	n/a	26	n	n/a	n/a	n	n/a	n	n/a	y	24	FLIR	P/N T197089	24
1127	Ninomiya	2017	VETERINARY OPHTHALMOLOGY	20	3	205	http://onlinelibrary.wiley.com/doi/10.1111/vop.12390/epdf	sea lion eyes	Mammals	y	n	n/a	n/a	n/a	n/a	y	assumed to be ambient	206	y	206	n	n/a	n	n/a	NEC	TVS-700	206
1128	Chinnadurai et al	2017	JOURNAL OF THE AMERICAN ASSOCIATION FOR LABORATORY ANIMAL SCIENCE	56	3	318	https://www.ncbi.nlm.nih.gov/pmc/articles/PMC5438926/pdf/jaalas2017000318.pdf	marmosets	Mammals	y	n	n/a	n/a	n/a	n/a	n	n/a	n/a	y	319	n	n/a	n	n/a	FLIR	T420	319
1129	Talas & Talas	2017	MAGYAR ALLATORVOSOK LAPJA	139	5	259	https://scholar.google.com/scholar_lookup?author=L%20Talas&atitle=Infrared%20thermography%20as%20an%20imaging%20diagnostics%20tool%20for%20equine%20medicine&publication_year=2017&hl=en&journal=MAGYAR%20ALLATORVOSOK%20LAPJA&volume=139&issue=5&pages=259-268&issn=0025-004X	horses	Agricultural Animals	y	n	n/a	n/a	n/a	n/a	y	assumed to be ambient	throughout	y	throughout	y	7	y	7	ICI	7640 IR	2
1131	Salamunes et al	2017	JOURNAL OF THERMAL BIOLOGY	66		1	https://ac.els-cdn.com/S0306456516303758/1-s2.0-S0306456516303758-main.pdf?_tid=1dfd27ce-d9e5-11e7-9fa1-00000aab0f02&acdnat=1512496561_c6b29e057953fffd3c9f19002ed55127	human	Humans/Medical	y	y	0.98	Fernandez-Cuevas et al 2015 ; Ring & Ammer 2012	https://ac.els-cdn.com/S1350449515000523/1-s2.0-S1350449515000523-main.pdf?_tid=b2343568-d9e5-11e7-bc79-00000aab0f6b&acdnat=1512496802_940b34159c4c7409be493269c9095f69 ; http://iopscience.iop.org/article/10.1088/0967-3334/33/3/R33/pdf	2	n	n/a	n/a	y	2	n	n/a	y	2	Fluke	Ti400	2
1132	Soroko et al	2017	JOURNAL OF THERMAL BIOLOGY	66		63	https://ac.els-cdn.com/S0306456516304144/1-s2.0-S0306456516304144-main.pdf?_tid=db3c7c6a-da79-11e7-a7f6-00000aacb35e&acdnat=1512560436_301fecc20804851d9eb81bd40ac980a3	horses	Mammals	y	y	1	n	n/a	65	y	assumed to be ambient	64	y	64	n	n/a	y	65	Jenoptik	VarioCam hr	64
1133	Leijon-Sundqvist	2017	JOURNAL OF THERMAL BIOLOGY	66		87	https://ac.els-cdn.com/S0306456517300360/1-s2.0-S0306456517300360-main.pdf?_tid=62993720-da7a-11e7-b7e6-00000aab0f27&acdnat=1512560663_757dc64106d26591824a1596dba93c66	human	Humans/Medical	y	y	0.98	Ring & Ammer 2012; Sanchez-Marin et al 2009	http://iopscience.iop.org/article/10.1088/0967-3334/33/3/R33/pdf ; https://www.ncbi.nlm.nih.gov/pubmed/19405736	88	n	n/a	n/a	n	n/a	n	n/a	y	88	FLIR	T640 or T660	88
1134	Kleinhenz et al	2017	JOURNAL OF ANIMAL SCIENCE	95	5	1993	https://academic.oup.com/jas/article/95/5/1993/4703555	cattle	Agricultural Animals	y	n	n/a	n/a	n/a	n/a	y	assumed to be ambient	1995	y	1995	y	1995	y	1995	FLIR	SC660	1995
1136	Daltro et al	2017	REVISTA BRASILEIRA DE ZOOTECNIA-BRAZILIAN JOURNAL OF ANIMAL SCIENCE	46	5	374	http://www.scielo.br/pdf/rbz/v46n5/1806-9290-rbz-46-05-0374.pdf	cattle	Agricultural Animals	y	y	0.98	n	n/a	375	y	assumed to be ambient	375	y	375	y	375	y	375	FLIR	T300	375
1137	Pimentel et al	2017	PESQUISA VETERINARIA BRASILEIRA	37	5	425	http://www.scielo.br/pdf/pvb/v37n5/1678-5150-pvb-37-05-00425.pdf	cattle	Agricultural Animals	y	n	n/a	n/a	n/a	n/a	n	n/a	n/a	y	427	n	n/a	y	427	FLIR	B60	427
1138	Pulido-Rodriguez et al	2017	PESQUISA VETERINARIA BRASILEIRA	37	5	453	http://www.scielo.br/pdf/pvb/v37n5/1678-5150-pvb-37-05-00453.pdf	pigs	Agricultural Animals	y	y	0.98	n	n/a	454	n	n/a	n/a	y	455	y	455	y	454	Testo	875	975
1139	Mishra et al	2017	BIOSENSORS & BIOELECTRONICS	91		796	https://ac.els-cdn.com/S095656631730043X/1-s2.0-S095656631730043X-main.pdf?_tid=46feb504-da7e-11e7-8290-00000aab0f01&acdnat=1512562335_6a96de391abb96d79cf769c6dc0aebea	humans	Humans/Medical	y	n	n/a	n/a	n/a	n/a	n	n/a	n/a	n	n/a	n	n/a	n	n/a	n	n	n/a
1140	Ortiz-Bustos et al	2017	FRONTIERS IN PLANT SCIENCE	8		833	https://www.ncbi.nlm.nih.gov/pmc/articles/PMC5435811/pdf/fpls-08-00833.pdf	leaves and flowers	Plants	y	n	n/a	n/a	n/a	n/a	n	n/a	n/a	y	3	n	n/a	y	3	FLIR	A305sc	3
1141	Omran	2017	ARCHIVES OF AGRONOMY AND SOIL SCIENCE	63	7	883	http://www.tandfonline.com/doi/pdf/10.1080/03650340.2016.1247952?needAccess=true	peanut	Plants	y	n	n/a	n/a	n/a	n/a	n	n/a	n/a	n	n/a	n	n/a	y	887	Fluke	Ti32	887
1142	Egea et al	2017	AGRICULTURAL WATER MANAGEMENT	187		210	https://ac.els-cdn.com/S037837741730121X/1-s2.0-S037837741730121X-main.pdf?_tid=6d00d42e-da80-11e7-ab5d-00000aab0f6b&acdnat=1512563258_5a059c204f6381b41c3531ed53125ed7	vegetation	Plants	y	n	n/a	n/a	n/a	n/a	n	n/a	n/a	y	table 1	y	table 1	n	n/a	FLIR	Tau 2 324	213
1146	Cuccurullo et al	2017	BIOSYSTEMS ENGINEERING	158		95	https://ac.els-cdn.com/S1537511016308935/1-s2.0-S1537511016308935-main.pdf?_tid=35c36e5c-da82-11e7-9f6c-00000aacb35f&acdnat=1512564024_28768584a99a788d30b6aecbb4d654ff	fruit	Plants	y	n	n/a	n/a	n/a	n/a	n	n/a	n/a	y	96	y	96	n	n/a	FLIR	P65	96
1147	Dong et al	2017	COLLOIDS AND SURFACES B-BIOINTERFACES	154		253	https://ac.els-cdn.com/S0927776517301546/1-s2.0-S0927776517301546-main.pdf?_tid=642bfde4-da83-11e7-84d1-00000aab0f26&acdnat=1512564531_25a1345910ffb85bf4e97b2dde5f5464	mice	Mammals	y	n	n/a	n/a	n/a	n/a	n	n/a	n/a	n	n/a	n	n/a	n	n/a	FLIR	E5	256
1148	Avni-Magen et al	2017	ISRAEL JOURNAL OF VETERINARY MEDICINE	72	2	22	http://www.ijvm.org.il/sites/default/files/avni-magen_final.pdf	elephants	Mammals	y	n	n/a	n/a	n/a	n/a	n	n/a	n/a	n	n/a	n	n/a	y	23	Jenoptik	VarioCAM	24
1151	Inoue et al	2017	PLANT AND CELL PHYSIOLOGY	58	6	1048	https://academic.oup.com/pcp/article/58/6/1048/3605026	vegetation	Plants	y	n	n/a	n/a	n/a	n/a	n	n/a	n/a	y	1056	y	1056	n	n/a	NEC	TVS-8500	1056
1154	Keenan et al	2017	PHYSIOLOGICAL MEASUREMENT	38	6		http://iopscience.iop.org/article/10.1088/1361-6579/aa6ea0/pdf	humans	Humans/Medical	y	y	0.97	measured		1104	y	assumed to be ambient	1106	y	1106	n	n/a	y	1107	FLIR	A325	1107
1157	Sales et al	2017	APPLIED ERGONOMICS	62		142	https://ac.els-cdn.com/S0003687017300625/1-s2.0-S0003687017300625-main.pdf?_tid=8e735bdc-da8e-11e7-ab5b-00000aacb361&acdnat=1512569327_b43c32288d3d662ea24c4cc48f1fd25d	humans on chairs	Humans/Medical	y	y	various	n	n/a	Table 1	y	assumed to be ambient	144	y	144	n	n/a	y	144	FLIR	ThermaCAM P640	144
1159	Wallage et al	2017	INTERNATIONAL JOURNAL OF BIOMETEOROLOGY	61	7	1309	https://link.springer.com/content/pdf/10.1007%2Fs00484-017-1309-1.pdf	bulls	Agricultural Animals	y	y	0.98	Steketee 1973	http://iopscience.iop.org/article/10.1088/0031-9155/18/5/307/pdf	1312	n	n/a	n/a	n	n/a	n	n/a	y	1312	Fluke	Ti25	1312
1160	Glaser & Kroger	2017	JOURNAL OF THERMAL BIOLOGY	67		30	https://ac.els-cdn.com/S0306456517300347/1-s2.0-S0306456517300347-main.pdf?_tid=a80df8d6-da9d-11e7-8ea6-00000aacb360&acdnat=1512575812_e1514fb8e8383445bb449b700cac16af	large herbivores	Mammals	y	y	1	Monteith & Unsworth 1990	http://denning.atmos.colostate.edu/readings/Monteith.and.Unsworth.4thEd.pdf	31	y	ambient (not used)	31	y	31	n	n/a	n	n/a	FLIR	E30 & T640	31
1161	Chapperon et al	2017	JOURNAL OF THERMAL BIOLOGY	67		40	https://ac.els-cdn.com/S0306456516302364/1-s2.0-S0306456516302364-main.pdf?_tid=6d8165d4-db3a-11e7-b854-00000aab0f02&acdnat=1512643145_8cc796d4e023d86faa42a586bd405a7c	snails	Other	y	y	0.95	Chapperon et al seuront 2011 (b)		41	n	n/a	n/a	n	n/a	n	n/a	y	41	OPTRIS	PI 200	41
1163	Unruh et al	2017	AMERICAN JOURNAL OF VETERINARY RESEARCH	78	7	771	https://avmajournals.avma.org/doi/pdf/10.2460/ajvr.78.7.771	cattle	Agricultural Animals	y	n	n/a	n/a	n/a	n/a	y	ambient (not used)	772	y	772	y	772	n	n/a	Fluke	Ti110	777
1165	Petry et al	2017	JOURNAL OF ANIMAL SCIENCE	95	7	3270	https://academic.oup.com/jas/article/95/7/3270/4703030	pigs	Agricultural Animals	y	y	0.98	Lahiri et al 2012	http://www.sciencedirect.com/science/article/pii/S1350449512000308#s0015	3271	n	n/a	n/a	n	n/a	n	n/a	y	3272	FLIR	E40	3272
1168	Lancaster et al	2017	FRONTIERS IN PHYSIOLOGY	8		461	https://www.frontiersin.org/articles/10.3389/fphys.2017.00461/full	teeth	Humans/Medical	y	y	0.96	n	n/a	3	y	sensible/ambient	3	y	3	y	3	n	n/a	FLIR	SC305	3
1169	Erregger et al	2017	JOURNAL OF EXPERIMENTAL BIOLOGY	220	14	2635	http://jeb.biologists.org/content/jexbio/220/14/2635.full.pdf	crickets	insects	y	y	0.97	stabentheiner & schmaranzer 1987 ; Kovac and stabentheiner 1999		2637	y	assumed to be ambient	2636	y	2637	y	2637	n	n/a	FLIR	SC2000-NTS	2637
1172	Elsayed et al	2017	AGRICULTURAL WATER MANAGEMENT	189		98	https://ac.els-cdn.com/S0378377417301701/1-s2.0-S0378377417301701-main.pdf?_tid=69236568-db4a-11e7-b854-00000aab0f02&acdnat=1512650018_66fd6c83e242b5bba64dcf3c769ef8a0	vegetation	Plants	y	y	0.96	n	n/a	100	n	n/a	n/a	n	n/a	n	n/a	y	100	Fluke	Ti-32	100
1174	Csoltova et al	2017	PHYSIOLOGY & BEHAVIOR	177		270	https://ac.els-cdn.com/S0031938417301403/1-s2.0-S0031938417301403-main.pdf?_tid=5473407e-db4b-11e7-97ae-00000aacb361&acdnat=1512650405_df01f88fa806300591dd4908f155936c	dogs	Mammals	y	y	0.98	n	n/a	273	y	ambient	273	y	273	y	273	y	273	Fluke	TiR1	273
1176	Faye et al	2017	AGRICULTURE ECOSYSTEMS & ENVIRONMENT	246		124	https://ac.els-cdn.com/S0167880917302268/1-s2.0-S0167880917302268-main.pdf?_tid=514b2122-db4c-11e7-a3cc-00000aab0f27&acdnat=1512650829_0730323326e2cacc79fa86ac7b0b05bb	vegetation	Plants	y	y	0.98	Rubio et al 1997	https://ac.els-cdn.com/S003442579600123X/1-s2.0-S003442579600123X-main.pdf?_tid=d1a68d78-ba56-11e7-89c2-00000aab0f6c&acdnat=1509026950_b64678d38afd4aab388313030e943c79	126	n	n/a	n/a	n	n/a	n	n/a	y	Fig 1	InfraTec	HR research 680	126
1177	Matteoli et al	2017	PHYSIOLOGICAL MEASUREMENT	38	8	1503	http://iopscience.iop.org/article/10.1088/1361-6579/aa78bd/pdf	humans	Humans/Medical	y	y	0.98	n	n/a	1505	n	n/a	n/a	y	1505	y	1505	y	1505	FLIR	320A	1505
1183	Ponsi et al	2017	PROCEEDINGS OF THE ROYAL SOCIETY B-BIOLOGICAL SCIENCES	284		1861	http://rspb.royalsocietypublishing.org/content/royprsb/284/1861/20170908.full.pdf	humans	Humans/Medical	y	n	n/a	n/a	n/a	n/a	n	n/a	n/a	y	4	n	n/a	y	4	FLIR	SC3000	4
1184	Karakus & Karakus	2017	ARCHIVES ANIMAL BREEDING	60	3	297	https://www.arch-anim-breed.net/60/297/2017/aab-60-297-2017.pdf	sheep	Agricultural Animals	y	n	n/a	n/a	n/a	n/a	n	n/a	n/a	y	298	y	298	y	298	FLIR	E50	298
1186	Gorresen et al	2017	ECOLOGY AND EVOLUTION	7	17	6669	http://onlinelibrary.wiley.com/doi/10.1002/ece3.3196/epdf	bats	Mammals	n	n	n/a	n/a	n/a	n/a	n	n/a	n/a	n	n/a	n	n/a	y	6671	Axis	Q1922-E	6671
1187	Weisshaupt et al	2017	METHODS IN ECOLOGY AND EVOLUTION	8	9	1133	http://onlinelibrary.wiley.com/doi/10.1111/2041-210X.12763/epdf	birds	Birds and Poultry	n	n	n/a	n/a	n/a	n/a	n	n/a	n/a	n	n/a	n	n/a	n	n/a	n	n	n/a
1191	Tenorio et al	2017	REVISTA BRASILEIRA DE ZOOTECNIA-BRAZILIAN JOURNAL OF ANIMAL SCIENCE	46	9	760	http://www.scielo.br/pdf/rbz/v46n9/1806-9290-rbz-46-09-0760.pdf	quail	Birds and Poultry	y	y	0.98	Naas et al 2010	http://www.scielo.br/pdf/sa/v67n5/v67n5a01.pdf	761	n	n/a	n/a	y	761	y	761	n	n/a	Testo	unknown model	761
1192	Ludovisi et al	2017	FRONTIERS IN PLANT SCIENCE	8		1681	https://www.frontiersin.org/articles/10.3389/fpls.2017.01681/full	vegetation	Plants	y	n	n/a	n/a	n/a	n/a	n	n/a	n/a	y	5	n	n/a	y	6	FLIR	A35	Figure 1
1195	Judge et al	2017	PACIFIC SCIENCE	71	4	425	http://www.bioone.org/doi/pdf/10.2984/71.4.3	sheep	Agricultural Animals	n	n	n/a	n/a	n/a	n/a	n	n/a	n/a	n	n/a	n	n/a	n	n/a	FLIR	Scout TS32r Pro	430
1196	Moe et al	2017	PHYSIOLOGY & BEHAVIOR	179		42	https://ac.els-cdn.com/S003193841730152X/1-s2.0-S003193841730152X-main.pdf?_tid=a4dfa8c2-db5f-11e7-ab5b-00000aacb361&acdnat=1512659129_f03c1db91012c9581c02d9215051a7a6	birds	Birds and Poultry	y	y	0.96	n	n/a	43	y	assumed to be ambient	43	y	43	y	43	n	n/a	FLIR	T620bx	43
1197	Bautista et al	2017	PHYSIOLOGY & BEHAVIOR	179		184	https://ac.els-cdn.com/S0031938417301774/1-s2.0-S0031938417301774-main.pdf?_tid=1daf9cda-db60-11e7-b622-00000aab0f27&acdnat=1512659340_53a521c14bbf8e8f8f73e11b7a3314df	rabbits	Mammals	y	n	n/a	n/a	n/a	n/a	n	n/a	n/a	y	185	n	n/a	n	n/a	fluke	Ti25	186
1198	Koprowski et al	2017	INTERNATIONAL JOURNAL OF PSYCHOPHYSIOLOGY	120		69	https://ac.els-cdn.com/S0167876017301927/1-s2.0-S0167876017301927-main.pdf?_tid=d1b5ee32-db60-11e7-bdfd-00000aab0f6b&acdnat=1512659634_7a6e1e752e8c854b3ded0c671d5eb4bb	humans	Humans/Medical	y	n	n/a	n/a	n/a	n/a	n	n/a	n/a	y	70	n	n/a	y	70	FLIR	T420sc	70
1199	Marti et al	2017	CANADIAN VETERINARY JOURNAL-REVUE VETERINAIRE CANADIENNE	58	10	1081	saved	cattle	Agricultural Animals	y	n	n/a	n/a	n/a	n/a	n	n/a	n/a	n	n/a	n	n/a	y	1082	FLIR	I60	1082
1200	Kahwage et al	2017	INTERNATIONAL JOURNAL OF BIOMETEOROLOGY	61	10	1819	https://link.springer.com/content/pdf/10.1007%2Fs00484-017-1367-4.pdf	sheep	Agricultural Animals	y	y	0.98	Hoffmann et al 2013	https://link.springer.com/content/pdf/10.1007%2Fs11259-012-9549-3.pdf	1821	n	n/a	n/a	y	1820	y	1820	y	1821	Testo	875i-2	1821
1201	Rizzo et al	2017	JOURNAL OF THERMAL BIOLOGY	69		64	https://ac.els-cdn.com/S0306456517301201/1-s2.0-S0306456517301201-main.pdf?_tid=4d0f6efe-db62-11e7-af88-00000aacb362&acdnat=1512660271_b994338c5f19806bf875c06062f8b0f5	dogs	Mammals	y	y	0.97	n	n/a	65	y	something sensible	65	y	65	y	65	y	65	FLIR	ThermaCam P25	65
1202	Knobel-Dail et al	2017	JOURNAL OF THERMAL BIOLOGY	69		118	https://ac.els-cdn.com/S0306456517300815/1-s2.0-S0306456517300815-main.pdf?_tid=c032b47c-db62-11e7-ab5b-00000aacb361&acdnat=1512660464_0c2f7c2884cc365b927dfe437547e018	humans	Humans/Medical	y	y	0.98	Steketee 1973	http://iopscience.iop.org/article/10.1088/0031-9155/18/5/307/pdf	119	n	n/a	n/a	y	120	y	120	y	119	FLIR	SC640	119
1204	Pantoja et al	2017	JOURNAL OF THERMAL BIOLOGY	69		302	https://ac.els-cdn.com/S0306456517302450/1-s2.0-S0306456517302450-main.pdf?_tid=516d5dec-db64-11e7-a3ca-00000aacb360&acdnat=1512661137_07f66d8003ac16653d58cc62f7335423	wild sheep	Mammals	y	y	0.98	Hoffmann et al 2013	https://link.springer.com/content/pdf/10.1007%2Fs11259-012-9549-3.pdf	305	n	n/a	n/a	y	303	y	303	y	305	FLIR	T300	305
1207	Stelletta et al	2017	THERIOGENOLOGY	103		137	http://www.theriojournal.com/article/S0093-691X(17)30363-1/pdf	goats	Agricultural Animals	y	n	n/a	n/a	n/a	n/a	n	n/a	n/a	n	n/a	n	n/a	y	139	FLIR	E60	139
1213	Rischbeck et al	2017	JOURNAL OF AGRONOMY AND CROP SCIENCE	203	6	483	http://onlinelibrary.wiley.com/doi/10.1111/jac.12223/epdf	vegetation	Plants	y	y	0.98	n	n/a	485	y	sensible value (sky)	485	y	table 2	y	table 2	y	485	FLIR	T335	485
1214	Gallego et al	2017	ECOLOGICAL ENTOMOLOGY	42	6	758	http://onlinelibrary.wiley.com/doi/10.1111/een.12447/epdf	insects	insects	y	y	0.96	measured	n/a	761	y	assumed to be ambient	761	y	761	n	n/a	n	n/a	FLIR	P620	761
1215	Daglish et al	2017	JOURNAL OF EQUINE VETERINARY SCIENCE	59		1	https://ac.els-cdn.com/S0737080617300874/1-s2.0-S0737080617300874-main.pdf?_tid=fdacfc3a-db68-11e7-80e7-00000aacb35d&acdnat=1512663144_66b7acb005f477f943b8800429db7e1f	horses	Agricultural Animals	y	y	0.98	n	n/a	2	n	n/a	n/a	y	2	n	n/a	y	2	FLIR	t420	2
1216	Kuprain et al	2017	PLANT CELL AND ENVIRONMENT	40	12	3101	http://onlinelibrary.wiley.com/doi/10.1111/pce.13078/epdf	vegetation	Plants	y	n	n/a	n/a	n/a	n/a	n	n/a	n/a	y	3103	n	n/a	y	3103	FLIR	T650sc	3103
1217	Radigonda et al	2017	TROPICAL ANIMAL HEALTH AND PRODUCTION	49	8	1787	https://link.springer.com/content/pdf/10.1007%2Fs11250-017-1378-5.pdf	cattle	Agricultural Animals	y	y	0.97	n	n/a	1788	n	n/a	n/a	n	n/a	n	n/a	y	1788	FLIR	T300	1788
1219	Neves et al	2017	JOURNAL OF THERMAL BIOLOGY	70		1	https://ac.els-cdn.com/S030645651730308X/1-s2.0-S030645651730308X-main.pdf?_tid=3d592a1a-db74-11e7-beb5-00000aab0f6b&acdnat=1512667975_2057cfff8e7f03c375fee66e61408345	humans	Humans/Medical	y	y	0.98	n	n/a	3	y	assumed to be ambient	3	y	3	n	n/a	n	n/a	Fluke	Ti400	3

## Sheet: Excluded
#	Authour	year	Journal	volume	issue	page	URL	reason for exclusion
1	Houdelier et al	2007	CHRONOBIOLOGY INTERNATIONAL	24	2	235	saved	not thermography
2	Liu et al	2007	Fifth International Conference on Photonics and Imaging in Biology and Medicine, Pts 1 and 2	6534		q5341	https://www.researchgate.net/publication/253531542_Five-dimensional_multifocal_multiphoton_microscopy_-_art_no_65341Q	not thermography
3	Dupuy et al	2007	INTERNATIONAL JOURNAL OF WILDLAND FIRE	16	3	324	http://www.publish.csiro.au/WF/WF06043	not obtained
5	Luzi et al	2007	ITALIAN JOURNAL OF ANIMAL SCIENCE	6	supp2	769	http://www.tandfonline.com/doi/pdf/10.4081/ijas.2007.1s.769	isolated abstract
6	Willard et al	2007	JOURNAL OF ANIMAL SCIENCE	85	supp2	26	n/a	isolated abstract
7	Godfrey et al	2007	JOURNAL OF ANIMAL SCIENCE	85	supp2	26	n/a	isolated abstract
9	Maletsky et al	2007	JOURNAL OF BIOMECHANICS	40	3	682	saved	not thermography
10	Godfrey et al	2007	JOURNAL OF DAIRY SCIENCE	90	supp1	676	n/a	isolated abstract
13	Lopuki	2007	POLISH JOURNAL OF ECOLOGY	55	3	543	https://miiz.waw.pl/pliki/article/ar55_3_10.pdf	not thermography
14	Godfrey	2007	POULTRY SCIENCE	86	supp1	676	n/a	isolated abstract
15	Gorbach	2007	PROCEEDINGS OF THE 8TH WORLD CONGRESS FOR MICROCIRCULATION			239	http://apps.webofknowledge.com/full_record.do?product=WOS&search_mode=Analyze&qid=13&SID=Z1EscIMkC9hVN5g9OEy&excludeEventConfig=ExcludeIfFromFullRecPage&page=1&doc=15	isolated abstract
16	Mangnusson et al	2007	SCANDINAVIAN JOURNAL OF FOREST RESEARCH	22	3	254	http://www.tandfonline.com/doi/pdf/10.1080/02827580701262964?needAccess=true	not thermography
17	Clayton et al	2007	VETERINARY AND COMPARATIVE ORTHOPAEDICS AND TRAUMATOLOGY	20	2	86	http://apps.webofknowledge.com/full_record.do?product=WOS&search_mode=Analyze&qid=13&SID=Z1EscIMkC9hVN5g9OEy&excludeEventConfig=ExcludeIfFromFullRecPage&page=1&doc=17	not thermography
19	Mital & Scott	2007	JOURNAL OF BIOMECHANICAL ENGINEERING	129	1	33		not thermography
20	Sewaes et al	2007	JOURNAL OF WILDLIFE MANAGEMENT	71	1	271	http://www.jstor.org/stable/pdf/4495173.pdf?refreqid=excelsior%3A08169feb0d0e8f24039b9c82b90fa106	not thermography
21	Pernar et al	2007	PERIODICUM BIOLOGORUM	109	1	67	n/a	not thermography
26	Lenk et al	2007	JOURNAL OF EXPERIMENTAL BOTANY	58	4	807	https://academic.oup.com/jxb/article/58/4/807/426942	not thermography
29	Chapman	2007	AGRICULTURAL AND FOREST METEOROLOGY	143	1	151	https://ac.els-cdn.com/S0168192306003935/1-s2.0-S0168192306003935-main.pdf?_tid=d08efdc8-b4b4-11e7-a3e7-00000aab0f6c&acdnat=1508407614_70326ebcbead885e76028ec8f66956ad	not thermography
33	Lawton et al	2007	HEALTH PSYCHOLOGY	26	3	259	saved	not thermography
34	Wakaiki et al	2007	JOURNAL OF VETERINARY MEDICAL SCIENCE	69	5	465	https://www.jstage.jst.go.jp/article/jvms/69/5/69_5_465/_pdf	not thermography
35	Gabr et al	2007	FISHERIES RESEARCH	85	1	112	https://eprints.lib.hokudai.ac.jp/dspace/bitstream/2115/54654/1/gabr(FisRes).pdf	not thermography
36	Gabr et al	2007	FISHERIES SCIENCE	73	3	557	https://link.springer.com/content/pdf/10.1111%2Fj.1444-2906.2007.01368.x.pdf	not thermography
37	Bolton et al	2007	JOURNAL OF FIELD ORNITHOLOGY	78	2	213	http://www.jstor.org/stable/pdf/27715201.pdf?refreqid=excelsior:f2808d821d5421074d9c94ee3446233c	not thermography
39	Meleddu	2007	BIOMECHANICS AND MODELING IN MECHANOBIOLOGY	6	4	253	https://link.springer.com/content/pdf/10.1007/s10237-006-0052-z.pdf	not biological
41	Rader et al	2007	JOURNAL OF WILDLIFE MANAGEMENT	71	5	1626	http://www.jstor.org/stable/pdf/4496241.pdf?refreqid=excelsior%3Ac5978ffc5176bf61b9a5d52b9fb32bec	not thermography
42	Larrucea et al	2007	JOURNAL OF WILDLIFE MANAGEMENT	71	5	1682	http://www.jstor.org/stable/pdf/4496250.pdf?refreqid=excelsior%3A5f841f9ec8d3f3a7f921ed65354c9392	not thermograaphy
43	White et al	2007	JOURNAL OF WILDLIFE MANAGEMENT	71	5	1708	http://www.jstor.org/stable/pdf/4496254.pdf?refreqid=excelsior%3Abe3d033aa7ddbbf9eec830b375463e73	not thermography
46	Tabuchi et al	2007	ENVIRONMENTAL ENTOMOLOGY	36	4	871	https://academic.oup.com/ee/article/36/4/871/469608	not thermography
47	Okabe & agetsuma	2007	JOURNAL OF MAMMALOGY	88	4	1090	https://academic.oup.com/jmammal/article/88/4/1090/908620	not thermography
49	Pierce & Pobprasert	2007	JOURNAL OF FIELD ORNITHOLOGY	78	3	322	http://www.jstor.org/stable/pdf/40345970.pdf?refreqid=excelsior%3Ade709f53b134465a641c5ca49531ba3d	not thermography
53	Martins et al	2007	EUROPEAN JOURNAL OF PLANT PATHOLOGY	119	2	159	https://link.springer.com/article/10.1007/s10658-007-9155-3	not thermography
54	Rieger et al	2007	JOURNAL OF BIOLOGICAL RHYTHMS	22	5	387	http://journals.sagepub.com/doi/pdf/10.1177/0748730407306198	not thermography
58	Jensen et al	2007	COMPUTERS AND ELECTRONICS IN AGRICULTURE	59	1	66	https://eprints.usq.edu.au/3034/2/Jensen_Apan_Young_Zeller_2007Authorversion.pdf	not thermography
59	Huebner et al	2007	JOURNAL OF FIELD ORNITHOLOGY	78	1	87	http://www.jstor.org/stable/pdf/27715183.pdf?refreqid=excelsior:23878357961226c67ef06055fa844885	not thermography
63	Larrucea et al	2007	WESTERN NORTH AMERICAN NATURALIST	67	4	538	http://scholarsarchive.byu.edu/cgi/viewcontent.cgi?article=2104&context=wnan	not thermography
64	Miller et al	2008	1ST CANTERBURY WORKSHOP ON OPTICAL COHERENCE TOMOGRAPHY AND ADAPTIVE OPTICS	7139		0Z	n/a	not thermography
65	Porter et al	2008	APPLIED HERPETOLOGY	5	3	293	http://booksandjournals.brillonline.com/docserver/15707539/v5n3_splitsection8.pdf?expires=1508757024&id=id&accname=id22610385&checksum=253E399472E0915481F5761E2F8A1C83	not thermogrphy
66	Gnyawali et al	2008	BIOPHOTONICS AND IMMUNE RESPONSES III	6857			n/a	not obtained
67	Hayes	2008	CHEMICAL SIGNALS IN VERTEBRATES 11	11		379	https://link.springer.com/chapter/10.1007/978-0-387-73945-8_36	not thermography
69	Stoll et al	2008	FUNCTIONAL PLANT BIOLOGY	35	4	281	n/a	not obtained
70	Ivancic et al	2008	JOURNAL OF PLANT RESEARCH	121	1	73	https://link.springer.com/content/pdf/10.1007%2Fs10265-007-0129-5.pdf	not thermography
76	Kelly & holub	2008	NORTHEASTERN NATURALIST	15	2	249	http://www.jstor.org/stable/pdf/25177104.pdf?refreqid=excelsior%3A8687678cdd413bd30a11e234ca58de44	not thermography
77	Wantanabe et al	2008	OPTICAL FIBERS AND SENSORS FOR MEDICAL DIAGNOSTICS AND TREATMENT APPLICATIONS VIII	6852			https://www.spiedigitallibrary.org/conference-proceedings-of-spie/6852/1/Dual-wavelength-laser-radiation-through-hollow-optical-fiber-for-hard/10.1117/12.761421.short	not thermography
78	Gupta et al	2008	PHOTONIC THERAPEUTICS AND DIAGNOSTICS IV	6842			https://www.spiedigitallibrary.org/conference-proceedings-of-spie/6842/1/Detection-of-blood-oxygen-level-by-noninvasive-passive-spectral-imaging/10.1117/12.768708.pdf	not thermography
79	Wilmink et al	2008	PHOTONIC THERAPEUTICS AND DIAGNOSTICS IV	6842			n/a	not obtained
80	Jones	2008	PROCEEDINGS OF THE FIFTH INTERNATIONAL SYMPOSIUM ON IRRIGATION OF HORTICULTURAL CROPS	792		391	n/a	not obtained
81	Schwalm et al	2008	TIERAERZTLICHE PRAXIS AUSGABE GROSSTIERE NUTZTIERE	36	5	324	https://tpg.schattauer.de/en/contents/archive/issue/295/manuscript/10514/show.html	not obtained
84	Seven et al	2008	HUMAN MOVEMENT SCIENCE	27	1	65	https://www.sciencedirect.com/science/article/pii/S016794570700098X	not thermography
86	Watts et al	2008	JOURNAL OF WILDLIFE MANAGEMENT	72	2	360	http://www.bioone.org/doi/abs/10.2193/2007-166	not thermography
88	Herlin et al	2008	AQUACULTURE	274	2	218	https://ac.els-cdn.com/S0044848607011581/1-s2.0-S0044848607011581-main.pdf?_tid=8dc52fea-b7f6-11e7-a72c-00000aab0f6c&acdnat=1508765702_43b1224985bd18e6cfe54ec68f9beff1	not thermography
89	Kim et al	2008	COMPUTERS AND ELECTRONICS IN AGRICULTURE	60	2	279	https://naldc.nal.usda.gov/download/15627/PDF	not thermography
90	Braden et al	2008	WILDLIFE BIOLOGY	14	1	155	http://www.bioone.org/doi/pdf/10.2981/0909-6396%282008%2914%5B155%3AFKDOVC%5D2.0.CO%3B2	not thermography
93	Olsson et al	2008	LANDSCAPE AND URBAN PLANNING	85	2	133	https://www.sciencedirect.com/science/article/pii/S0169204607002745	not thermography
96	Repo et al	2008	ENVIRONMENTAL AND EXPERIMENTAL BOTANY	63	1	59	https://ac.els-cdn.com/S0098847207001876/1-s2.0-S0098847207001876-main.pdf?_tid=99b9b6f8-b7fc-11e7-bb1f-00000aacb361&acdnat=1508768300_e3536c38e79b5343063e14e0ac82362f	not thermography
98	Adriani et al	2008	ASTROBIOLOGY	8	3	613	http://online.liebertpub.com/doi/abs/10.1089/ast.2007.0167	not biological
99	Rossel et al	2008	BIOSYSTEMS ENGINEERING	100	2	149	https://ac.els-cdn.com/S1537511008000597/1-s2.0-S1537511008000597-main.pdf?_tid=b4c7a31e-b7fd-11e7-8343-00000aacb362&acdnat=1508768775_e4b54c657c4697c48973a371e6bb6acd	not thermography
100	Larrucea & Brussard	2008	JOURNAL OF MAMMALOGY	89	3	691	http://www.bioone.org/doi/abs/10.1644/07-MAMM-A-199R.1	not thermography
101	Terhune et al	2008	JOURNAL OF RAPTOR RESEARCH	42	2	148	http://www.bioone.org/doi/abs/10.3356/JRR-05-75.1	not thermography
106	Kaizu et al	2008	COMPUTERS AND ELECTRONICS IN AGRICULTURE	63	1	49	https://ac.els-cdn.com/S0168169908000094/1-s2.0-S0168169908000094-main.pdf?_tid=08fc9ce8-b801-11e7-981a-00000aacb35e&acdnat=1508770204_a378cd3c87bce39ee4168a8a2b86ea43	not thermography
107	Mahesh et al	2008	BIOSYSTEMS ENGINEERING	101	1	50	https://ac.els-cdn.com/S1537511008001797/1-s2.0-S1537511008001797-main.pdf?_tid=43d1dea0-b801-11e7-b75c-00000aacb362&acdnat=1508770303_9aa2368cc82de60f9abd3064d921b77d	not thermography
109	Savery et al	2008	Berliner und Münchener Tierärztliche Wochenschrift	115	9	324	saved	not thermography
111	Larrucea &Bussard	2008	JOURNAL OF ARID ENVIRONMENTS	72	9	1636	https://ac.els-cdn.com/S0140196308000815/1-s2.0-S0140196308000815-main.pdf?_tid=5800ef3c-b807-11e7-8096-00000aab0f6b&acdnat=1508772914_7bb9aab395d71d1429c00361d6497aaf	not thermography
114	Huckschlag	2008	EUROPEAN JOURNAL OF WILDLIFE RESEARCH	54	4	651	https://link.springer.com/content/pdf/10.1007%2Fs10344-008-0191-x.pdf	not thermography
115	Lyra-Jorge et al	2008	EUROPEAN JOURNAL OF WILDLIFE RESEARCH	54	4	739	https://link.springer.com/content/pdf/10.1007%2Fs10344-008-0205-8.pdf	not thermography
124	Song et al	2009	2009 ACADEMIC CONFERENCE ON HORTICULTURE SCIENCE AND TECHNOLOGY, PROCEEDINGS				n/a	isolated abstract
125	Kastek et al	2009	AIR POLLUTION XVII	123		227	https://www.witpress.com/Secure/elibrary/papers/AIR09/AIR09021FU1.pdf	not biological
126	Wellmann & Downs	2009	ANIMAL BEHAVIOUR	77	1	61	https://www.sciencedirect.com/science/article/pii/S0003347208004466	not thermography
129	Jia et al	2009	COMPUTER AND COMPUTING TECHNOLOGIES IN AGRICULTURE II, VOLUME 2	295		1161	https://link.springer.com/content/pdf/10.1007/978-1-4419-0211-5_43.pdf	not thermography
130	Ji	2009	CONTROLLING SEISMIC HAZARD AND SUSTAINABLE DEVELOPMENT OF DEEP MINES: 7TH INTERNATIONAL SYMPOSIUM ON ROCKBURST AND SEISMICITY IN MINES (RASIM7), VOL 1 AND 2			177	n/a	not biological
131	Li et al	2009	CONTROLLING SEISMIC HAZARD AND SUSTAINABLE DEVELOPMENT OF DEEP MINES: 7TH INTERNATIONAL SYMPOSIUM ON ROCKBURST AND SEISMICITY IN MINES (RASIM7), VOL 1 AND 2			1341	n/a	not biological
132	White et al	2009	ERGONOMICS	52	4	492	http://www.tandfonline.com/doi/pdf/10.1080/00140130802707907?needAccess=true	not thermography
134	Watson et al	2009	FOLIA PRIMATOLOGICA	80	5	309	https://www.researchgate.net/profile/Johanna_Watson/publication/38099576_The_Kinematics_of_Load_Carrying_in_Humans_and_Great_Apes_Implications_for_the_Evolution_of_Human_Bipedalism/links/560a62f108ae1396914bc504.pdf	not thermography
135	Merta et al	2009	FOLIA ZOOLOGICA	58	2	159	http://www.ivb.cz/folia_zoologica/archive/58_159-167.pdf	not thermography
140	Costa	2009	ITALIAN JOURNAL OF ANIMAL SCIENCE	8	supp1	241	http://www.tandfonline.com/doi/pdf/10.4081/ijas.2009.s1.241	not thermoraphy
145	Jo & Narayanan	2009	PROCEEDINGS OF THE ASME FLUIDS ENGINEERING DIVISION SUMMER CONFERENCE - 2008, VOL 2			491	https://scholar.google.co.uk/scholar?hl=en&as_sdt=0%2C5&q=THERMALLY+ACTUATED+PUMPING+OF+A+FLUID+WITH+A+FREE+INTERFACE+USING+SURFACE+ASYMMETRY&btnG=	not biological
147	Newman et al	2009	WILDLIFE RESEARCH	36	2	159	http://www.publish.csiro.au/wr/wr06074	not thermography
148	Gigliotti et al	2009	WILDLIFE RESEARCH	36	4	333	http://www.publish.csiro.au/WR/WR06020	not thermography
149	Zotte et al	2009	APPLIED ANIMAL BEHAVIOUR SCIENCE	116	2	273	https://ac.els-cdn.com/S0168159108002098/1-s2.0-S0168159108002098-main.pdf?_tid=1bc9df2a-b8ab-11e7-b474-00000aacb361&acdnat=1508843250_839c90b786d474d78020cfee04838a89	Not thermography
150	Montanholi et al	2009	CANADIAN JOURNAL OF ANIMAL SCIENCE	89	1	155	http://www.nrcresearchpress.com/doi/pdf/10.4141/CJAS09300	isolated abstract
151	Colyn et al	2009	CANADIAN JOURNAL OF ANIMAL SCIENCE	89	1	156	http://www.nrcresearchpress.com/doi/pdf/10.4141/CJAS09301	isolated abstract
152	Schaefer et al	2009	CANADIAN JOURNAL OF ANIMAL SCIENCE	89	1	178	http://www.nrcresearchpress.com/doi/pdf/10.4141/CJAS09302	isolated abstract
153	Hobbs et al	2009	EQUINE VETERINARY JOURNAL	41	3	229	http://onlinelibrary.wiley.com/doi/10.2746/042516409X395967/epdf	not thermography
154	Alvarez et al	2009	EQUINE VETERINARY JOURNAL	41	3	297	http://onlinelibrary.wiley.com/doi/10.2746/042516409X397370/epdf	not thermography
155	Honda et al	2009	MAMMAL STUDY	34	1	13	http://www.bioone.org/doi/abs/10.3106/041.034.0103	not thermography
157	McMullen et al	2009	VETERINARY OPHTHALMOLOGY	12	2	125	http://onlinelibrary.wiley.com/doi/10.1111/j.1463-5224.2008.00688.x/epdf	not thermography
159	Rath & Kawollek	2009	COMPUTERS AND ELECTRONICS IN AGRICULTURE	66	1	85	https://ac.els-cdn.com/S0168169908002457/1-s2.0-S0168169908002457-main.pdf?_tid=42c73510-b8af-11e7-bc5e-00000aacb362&acdnat=1508845034_a85fd5bab638f01e49f102b991379010	not thermography
168	Person & Russell	2009	NORTHWEST SCIENCE	83	3	211	http://www.bioone.org/doi/full/10.3955/046.083.0305	not obtained
170	Sepulcre-Canto et al	2009	AGRICULTURAL AND FOREST METEOROLOGY	149	6	962	http://hal.ird.fr/ird-00405627/document	not thermoraphy
172	Zhu et al	2009	JOURNAL OF BIOMECHANICAL ENGINEERING-TRANSACTIONS OF THE ASME	131	7	71004	http://www.umbc.edu/lamp/pubwork/Zhu_ASMEJBio.pdf	not biological
174	Shimbayama et al	2009	PLANT PRODUCTION SCIENCE	12	3	293	http://www.tandfonline.com/doi/pdf/10.1626/pps.12.293	not thermography
177	Zou et al	2009	TREE PHYSIOLOGY	29	8	1069	https://academic.oup.com/treephys/article/29/8/1069/1670149	not thermography
178	Ishibashi et al	2009	AQUACULTURE	293	3	157	https://ac.els-cdn.com/S0044848609004074/1-s2.0-S0044848609004074-main.pdf?_tid=8059c6be-b985-11e7-a556-00000aab0f6c&acdnat=1508937049_f5cab047c7a2db528c2b3d43f53f92e8	not thermography
180	Ito-Inaba et al	2009	JOURNAL OF EXPERIMENTAL BOTANY	60	13	3909	https://academic.oup.com/jxb/article/60/13/3909/531083	not thermography
181	Wang & weathers	2009	WILSON JOURNAL OF ORNITHOLOGY	121	3	512	http://www.jstor.org/stable/pdf/20616939.pdf?refreqid=excelsior:38fb4dc15a0c72cf5dc33ffd137f3971	not thermography
183	Burciaga-Robles et al	2009	AMERICAN JOURNAL OF VETERINARY RESEARCH	70	10	1291	http://avmajournals.avma.org/doi/pdf/10.2460/ajvr.70.10.1291	not thermography
185	Larrucea & Bussard	2009	JOURNAL OF MAMMALOGY	90	5	1176	https://academic.oup.com/jmammal/article/90/5/1176/872174	not thermography
187	Baranyai & Zude	2009	COMPUTERS AND ELECTRONICS IN AGRICULTURE	69	1	33	https://ac.els-cdn.com/S0168169909001185/1-s2.0-S0168169909001185-main.pdf?_tid=be29beac-b98c-11e7-bb83-00000aab0f6b&acdnat=1508940159_5438997a185d8e36af584d9bc00cbcac	not thermography
188	Korsoen et al	2009	AQUACULTURE	296	3	373	https://www.researchgate.net/profile/Tore_Kristiansen/publication/229400959_Long-term_culture_of_Atlantic_salmon_Salmo_salar_L_in_submerged_cages_during_winter_affects_behaviour_growth_and_condition/links/570381fc08aedbac12705272.pdf	not thermography
189	McShea et al	2009	BIOLOGICAL CONSERVATION	142	12	3108	https://www.sciencedirect.com/science/article/pii/S0006320709003772	not thermography
190	Aguzzi et al	2009	SCIENTIA MARINA	73	4	773	http://scientiamarina.revistas.csic.es/index.php/scientiamarina/article/view/1102	not thermography
193	Rodriguez-Duran et al	2010	ACTA CHIROPTEROLOGICA	12	2	359	http://www.bioone.org/doi/abs/10.3161/150811010X537945	not thermography
195	Jekkel et al	2010	ARCHIV FUR TIERZUCHT-ARCHIVES OF ANIMAL BREEDING	53	2	205	http://www.archivtierzucht.de/pdf/2010/at10p205.pdf	not thermography
197	Benson et al	2010	JOURNAL OF ANIMAL ECOLOGY	79	1	225	http://onlinelibrary.wiley.com/doi/10.1111/j.1365-2656.2009.01604.x/epdf	not thermography
198	Schaefer et al	2010	JOURNAL OF DAIRY SCIENCE	93	supp1	22	n/a	isolated abstract
199	Morales et al	2010	JOURNAL OF DAIRY SCIENCE	93	supp1	29	n/a	isolated abstract
200	Colyn et al	2010	JOURNAL OF DAIRY SCIENCE	93	supp1	160	n/a	isolated abstract
201	Gonzalez et al	2010	JOURNAL OF DAIRY SCIENCE	93	supp1	464	n/a	isolated abstract
202	Boland et al	2010	JOURNAL OF DAIRY SCIENCE	93	supp1	686	n/a	isolated abstract
203	Dupre et al	2010	JOURNAL OF DAIRY SCIENCE	94	supp1	761	n/a	isolated abstract
204	Orman & Endres	2010	JOURNAL OF DAIRY SCIENCE	94	supp1	772	n/a	isolated abstract
205	Collins et al	2010	LASER APPLICATIONS IN LIFE SCIENCES	7376		UNSP 737619	https://www.spiedigitallibrary.org/conference-proceedings-of-spie/7376/1/Measurement-of-light-scattering-from-trapped-particles/10.1117/12.871613.pdf?SSO=1	not thermography
206	Lee et al	2010	LASERS IN DENTISTRY XVI	7549		75490K	https://www.ncbi.nlm.nih.gov/pmc/articles/PMC3234206/pdf/nihms320528.pdf	not thermography
207	Maung et al	2010	LASERS IN DENTISTRY XVI	7549		754902	https://www.ncbi.nlm.nih.gov/pmc/articles/PMC3175377/pdf/nihms320527.pdf	not thermography
209	Tomastik et al	2010	PEDESTRIAN AND EVACUATION DYNAMICS 2008			215	https://link.springer.com/content/pdf/10.1007%2F978-3-642-04504-2.pdf	not biological
210	Klaessens et al	2010	PHOTONIC THERAPEUTICS AND DIAGNOSTICS VI	7548			https://www.spiedigitallibrary.org/conference-proceedings-of-spie/7548/1/Thermographic-and-oxygenation-imaging-system-for-non-contact-skin-measurements/10.1117/12.841645.pdf	not obtained
211	Sharma et al	2010	PHOTONICS NORTH 2010	7750		UNSP 775007	saved	not thermography
213	Hagiwara et al	2010	PROCEEDINGS OF THE ASME INTERNATIONAL HEAT TRANSFER CONFERENCE - 2010, VOL 1: BIO HEAT TRANSFER, BOILING HEAT TRANSFER, COMPUTATIONAL HEAT TRANSFER			49	https://scholar.google.co.uk/scholar?hl=en&as_sdt=0%2C5&q=LOCAL+TEMPERATURE+AND+HEAT+FLUX+IN+THE+AQUEOUS+SOLUTION+OF+ANTIFREEZE+PROTEIN+NEAR+ICE+SURFACES+IN+A+NARROW+SPACE&btnG=	not thermography
214	Netz et al	2010	PROCEEDINGS OF THE ASME INTERNATIONAL HEAT TRANSFER CONFERENCE - 2010, VOL 1: BIO HEAT TRANSFER, BOILING HEAT TRANSFER, COMPUTATIONAL HEAT TRANSFER			523	https://scholar.google.co.uk/scholar?hl=en&as_sdt=0%2C5&q=INCIPIENT+FLOW+BOILING+IN+A+VERTICAL+CHANNEL+WITH+A+WAVY+WALL&btnG=	not biological
215	Jeon et al	2010	PROCEEDINGS OF THE ASME INTERNATIONAL HEAT TRANSFER CONFERENCE - 2010, VOL 1: BIO HEAT TRANSFER, BOILING HEAT TRANSFER, COMPUTATIONAL HEAT TRANSFER			577	https://scholar.google.co.uk/scholar?hl=en&as_sdt=0%2C5&q=INVESTIGATION+OF+FLOW+BOILING+ON+NANOSTRUCTURED+SURFACES&btnG=	not biological
216	Scolari et al	2010	REPRODUCTION FERTILITY AND DEVELOPMENT	22	1	178	http://www.publish.csiro.au/rd/Fulltext/RDv22n1ab41	isolated abstract
218	Rhyan & Spraker	2010	VETERINARY PATHOLOGY	47	1	34	http://journals.sagepub.com/doi/pdf/10.1177/0300985809354466	not thermography
219	Lega et al	2010	WASTE MANAGEMENT AND THE ENVIRONMENT V	140		123	https://www.witpress.com/Secure/elibrary/papers/WM10/WM10012FU1.pdf	not thermography
225	Singh et al	2010	BIOSYSTEMS ENGINEERING	105	3	380	https://ac.els-cdn.com/S1537511009003614/1-s2.0-S1537511009003614-main.pdf?_tid=c4395584-ba5c-11e7-82b2-00000aacb35d&acdnat=1509029505_7d5300b7cec7306dee6511fc57db5db2	not thermography
231	Song et al	2010	PHILIPPINE AGRICULTURAL SCIENTIST	93	1	56		not obtained
232	D'Aout et al	2010	AMERICAN JOURNAL OF PHYSICAL ANTHROPOLOGY	141	4	515	http://onlinelibrary.wiley.com/doi/10.1002/ajpa.21169/epdf	not thermography
233	Bentkowski et al	2010	HYDROBIOLOGIA	643		43	https://link.springer.com/content/pdf/10.1007%2Fs10750-010-0134-x.pdf	not thermography
234	Li et al	2010	IBIS	152	2	299	http://onlinelibrary.wiley.com/doi/10.1111/j.1474-919X.2009.00989.x/epdf	not thermography
235	Witmer et al	2010	JOURNAL OF WILDLIFE DISEASES	46	2	368	http://www.bioone.org/doi/pdf/10.7589/0090-3558-46.2.368	not thermography
237	Graham et al	2010	AGRICULTURAL AND FOREST METEOROLOGY	150	4	640	http://www.sciencedirect.com/science/article/pii/S0168192310000511	not thermography
239	Ritchie et al	2010	CROP SCIENCE	50	3	1000	https://dl.sciencesocieties.org/publications/cs/abstracts/50/3/1000	not obtained
241	Song & Li	2010	PHILIPPINE AGRICULTURAL SCIENTIST	93	2	182		not thermography
243	Sanchez-Bustinduy et al	2010	VETERINARY SURGERY	39	4	523	http://onlinelibrary.wiley.com/doi/10.1111/j.1532-950X.2010.00672.x/epdf	not thermography
244	Jackrel & Matlack	2010	AMERICAN MIDLAND NATURALIST	164	1	74	http://www.jstor.org/stable/pdf/40730952.pdf?refreqid=excelsior:efca81af99a0f9256e3a25dbbf1050a8	not thermography
247	Esposito et al	2010	JOURNAL OF BIOLOGICAL REGULATORS AND HOMEOSTATIC AGENTS	24	3	307	http://europepmc.org/abstract/med/20846478	not obtained
254	Millard et al	2010	JOURNAL OF SMALL ANIMAL PRACTICE	51	8	419	http://onlinelibrary.wiley.com/doi/10.1111/j.1748-5827.2010.00956.x/epdf	not thermography
257	Liger-Belair et al	2010	JOURNAL OF AGRICULTURAL AND FOOD CHEMISTR	58	15	8768	https://pubs.acs.org/doi/abs/10.1021/jf101239w	not biological
260	Bratcher et al	2010	JOURNAL OF THE AMERICAN ASSOCIATION FOR LABORATORY ANIMAL SCIENCE	49	5	667	n/a	isolated abstract
261	Li et al	2010	FIELD CROPS RESEARCH	118	3	221	https://ac.els-cdn.com/S0378429010001358/1-s2.0-S0378429010001358-main.pdf?_tid=d89c25e2-bc9b-11e7-8fb4-00000aacb35e&acdnat=1509276500_9786cf346ef79950fd9840c53f1bb676	not thermography
262	Warren et al	2010	AMERICAN JOURNAL OF PHYSIOLOGY-HEART AND CIRCULATORY PHYSIOLOGY	299	4	H1271	https://www.physiology.org/doi/abs/10.1152/ajpheart.00248.2010	not thermography
263	Fu et al	2010	AMERICAN JOURNAL OF VETERINARY RESEARCH	71	10	1118	http://avmajournals.avma.org/doi/full/10.2460/ajvr.71.10.1118	not thermography
265	Gula et al	2010	EUROPEAN JOURNAL OF WILDLIFE RESEARCH	56	5	803	https://hal.archives-ouvertes.fr/file/index/docid/592581/filename/10344_2010_392_OnlinePDF_ReferencePDF.pdf	not thermography
266	St Clair et al	2010	JOURNAL OF ORNITHOLOGY	151	4	811	https://hal.archives-ouvertes.fr/hal-00582599/document	not thermography
268	Steinmeyer et al	2010	ANIMAL BEHAVIOUR	80	5	853	https://edoc.ub.uni-muenchen.de/14987/1/Loes_Corinna.pdf#page=31	not thermography
269	Huang et al	2010	BIOSYSTEMS ENGINEERING	107	3	212	https://pubag.nal.usda.gov/pubag/downloadPDF.xhtml?id=47560&content=PDF	not thermography
274	Kahn et al	2010	ECOHEALTH	7	4	517	https://link.springer.com/content/pdf/10.1007%2Fs10393-010-0366-2.pdf	not thermography
276	Mohd-Azlan et al	2010	TROPICAL ECOLOGY	51	2	297	https://scholar.google.com/scholar_lookup?author=J%20Mohd-Azlan&atitle=Preliminary%20assessment%20of%20activity%20pattern%20and%20diet%20of%20the%20lesser%20dog%20faced%20fruit%20bat%20Cynopterus%20brachyotis%20in%20a%20Dipterocarp%20Forest,%20Sarawak,%20Borneo&publication_year=2010&hl=en&journal=TROPICAL%20ECOLOGY&volume=51&issue=2&pages=297-302&issn=0564-3295	not thermography
277	Oneto et al	2010	JOURNAL OF HERPETOLOGY	44	4	649	http://www.jstor.org/stable/pdf/40983661.pdf?refreqid=excelsior%3A928d2bd7412a98fcb3123fd403122e43	not thermography
278	Huang et al	2010	IRRIGATION AND DRAINAGE	59	5	524	https://www.ars.usda.gov/ARSUserFiles/60663500/Publications/Huang/Huang%20et%20al%2009%20ID%20DOI%2010.1002-ird.511.pdf	not biological
280	Piksa et al	2011	ACTA CHIROPTEROLOGICA	13	1	113	https://scholar.google.com/scholar_lookup?doi=10%2E3161%2F150811011X578660&issn=1508-1109&issue=1&journal=ACTA%20CHIROPTEROLOGICA&hl=en&pages=113-122&title=Swarming%20of%20bats%20at%20different%20elevations%20in%20the%20Carpathian%20Mountains&author=K%20Piksa&publication_year=2011&volume=13	not thermography
281	Klaessems et al	2011	ADVANCED BIOMEDICAL AND CLINICAL DIAGNOSTIC SYSTEMS IX	7890				not thermography
283	Dupuy et al	2011	INTERNATIONAL JOURNAL OF WILDLAND FIRE	20	2	289	http://www.publish.csiro.au/wf/WF09076	not obtained
284	Zhu et al	2011	JOURNAL OF INTEGRATIVE PLANT BIOLOGY	53	1	7	http://onlinelibrary.wiley.com/doi/10.1111/j.1744-7909.2010.01004.x/epdf	not thermography
285	Can et al	2011	ORYX	45	1	112	https://www.cambridge.org/core/services/aop-cambridge-core/content/view/563FB3CAAD9052ADCE683C1514757FC4/S0030605310001328a.pdf/wildcat_felis_silvestris_in_northern_turkey_assessment_of_status_using_camera_trapping.pdf	not thermography
287	Mozgeris et al	2011	RURAL DEVELOPMENT IN GLOBAL CHANGES, VOL 5, BOOK 2	5	2	452	http://dspace.lzuu.lt/jspui/bitstream/1/2902/2/rural_development_2011_book2.pdf#page=453	not thermography
288	Qin et al	2011	SENSING FOR AGRICULTURE AND FOOD QUALITY AND SAFETY III	8027			n/a	not thermography
289	Wheaton et al	2011	VI INTERNATIONAL SYMPOSIUM ON IRRIGATION OF HORTICULTURAL CROPS	889		123	http://apps.webofknowledge.com/full_record.do?product=WOS&search_mode=Analyze&qid=12&SID=1FcOHB5oKubtxcYqkQY&excludeEventConfig=ExcludeIfFromFullRecPage&page=28&doc=289	not obtained
290	Stagno et al	2011	VI INTERNATIONAL SYMPOSIUM ON IRRIGATION OF HORTICULTURAL CROPS	889		347	http://www.actahort.org/members/showpdf?booknrarnr=889_42	not obtained
291	Bengsen et al	2011	WILDLIFE RESEARCH	38	8	732	http://www.publish.csiro.au/wr/pdf/WR11134	not thermoraphy
293	Garcia-Tejero et al	2011	FUNCTIONAL PLANT BIOLOGY	38	2	106	http://www.publish.csiro.au/fp/FP10202	not obtained
294	Shibayama et al	2011	PLANT PRODUCTION SCIENCE	14	1	30	https://www.jstage.jst.go.jp/article/pps/14/1/14_1_30/_pdf	not thermoraphy
295	Nuka et al	2011	ZOOLOGICAL STUDIES	50	1	16	http://zoolstud.sinica.edu.tw/Journals/50.1/16.pdf	not thermoraphy
296	Rader et al	2011	JOURNAL OF WILDLIFE MANAGEMENT	75	1	61	http://www.bioone.org/doi/pdf/10.1002/jwmg.4	not obtained
298	Cunningham & Castro	2011	NEW ZEALAND JOURNAL OF ECOLOGY	35	3	209	https://scholar.google.co.uk/scholar?hl=en&as_sdt=0%2C5&q=The+secret+life+of+wild+brown+kiwi%3A+studying+behaviour+of+a+cryptic+species+by+direct+observation&btnG=	not thermography
299	Paull et al	2011	WILDLIFE RESEARCH	38	3	188	http://www.publish.csiro.au/wr/pdf/WR10203	not thermography
300	Alvarado-Castro & Jimenez	2011	JOURNAL OF ARACHNOLOGY	39	1	118	http://www.jstor.org/stable/pdf/23048788.pdf?refreqid=excelsior:29fdf8a4fdcd18a2025c58ab1fa4e7e5	not thermography
303	Rodriquez-Herrera	2011	ACTA CHIROPTEROLOGICA	13	2	365	http://www.ecologia-unam.com.mx/wp-content/uploads/2016/02/Rodr%C3%ADguez-Herrera-Ceballos-y-Medell%C3%ADn-2011-Acta-Chiropterologica.pdf	not thermography
304	Hao et al	2011	INTERNATIONAL SYMPOSIUM ON HIGH TECHNOLOGY FOR GREENHOUSE SYSTEMS: GREENSYS2009	893		815	http://www.actahort.org/members/showpdf?booknrarnr=893_89	not obtained
305	Xu et al	2011	COMPUTER AND COMPUTING TECHNOLOGIES IN AGRICULTURE IV, PT 4	347		321	https://link.springer.com/content/pdf/10.1007%2F978-3-642-18369-0_37.pdf	not biological
307	Sadler & Nieh	2011	JOURNAL OF EXPERIMENTAL BIOLOGY	214	3	469	http://jeb.biologists.org/content/jexbio/214/3/469.full.pdf	not thermography
309	Amri et al	2011	COMPUTERS IN BIOLOGY AND MEDICINE	41	2	76	https://ac.els-cdn.com/S001048251000171X/1-s2.0-S001048251000171X-main.pdf?_tid=3be39c2c-bd58-11e7-a91c-00000aab0f26&acdnat=1509357412_2030f355641b6f8d02f69603e745d6d3	not biological
310	Carver et al	2011	JOURNAL OF MAMMALOGY	92	1	134	https://academic.oup.com/jmammal/article/92/1/134/938423	not thermography
311	Olofsson et al	2011	ANIMAL BEHAVIOUR	81	3	529	https://www.sciencedirect.com/science/article/pii/S0003347210005026	not thermography
312	Bonter & Bridge	2011	JOURNAL OF FIELD ORNITHOLOGY	82	1	1	http://onlinelibrary.wiley.com/doi/10.1111/j.1557-9263.2010.00302.x/epdf	not thermography
314	Cestari et al	2011	WILSON JOURNAL OF ORNITHOLOGY	123	1	102	http://www.jstor.org/stable/pdf/23033489.pdf?refreqid=excelsior%3A2e0fd677400a9eb85e7787eba142fbd9	not thermography
315	Herring et al	2011	SOUTHWESTERN NATURALIST	56	1	35	http://www.jstor.org/stable/pdf/23028109.pdf?refreqid=excelsior%3Adf9250de521d0465333684a21c6ad51d	not thermography
316	Deng et al	2011	JOURNAL OF AGRICULTURAL SCIENCE AND TECHNOLOGY	13	3	377	https://scholar.google.com/scholar_lookup?author=Y%20Deng&atitle=Impact%20of%20Pressure%20Reduction%20Rate%20on%20the%20Quality%20of%20Steamed%20Stuffed%20Bun&publication_year=2011&hl=en&journal=JOURNAL%20OF%20AGRICULTURAL%20SCIENCE%20AND%20TECHNOLOGY&volume=13&issue=3&pages=377-386&issn=1680-7073	not biological
318	Goris	2011	JOURNAL OF HERPETOLOGY	45	1	2	http://www.jstor.org/stable/pdf/41415237.pdf?refreqid=excelsior%3Aa596277abddcb35a46a8012388ee41bc	not thermography
320	Dammer et al	2011	CROP PROTECTION	30	4	420	https://ac.els-cdn.com/S0261219410003777/1-s2.0-S0261219410003777-main.pdf?_tid=58399d22-bd5d-11e7-9564-00000aacb361&acdnat=1509359607_88b9869cf74dbf9e54b8e8cc7db27cf9	not thermography
322	Milstein et al	2011	JOURNAL OF BIOPHOTONICS	4	4	219	http://onlinelibrary.wiley.com/doi/10.1002/jbio.201000055/epdf	not thermography
323	Garrote et al	2011	EUROPEAN JOURNAL OF WILDLIFE RESEARCH	57	2	355	https://hal.archives-ouvertes.fr/hal-00629072/document	not thermography
327	Loughin & Marino	2011	JOURNAL OF VETERINARY INTERNAL MEDICINE	25	3	752	http://onlinelibrary.wiley.com/doi/10.1111/j.1939-1676.2011.0726.x/epdf	isolated abstract
328	Loughim & Marino	2011	JOURNAL OF VETERINARY INTERNAL MEDICINE	25	3	752	http://onlinelibrary.wiley.com/doi/10.1111/j.1939-1676.2011.0726.x/epdf	isolated abstract
331	Lunadei et al	2011	POSTHARVEST BIOLOGY AND TECHNOLOGY	60	3	225	https://www.sciencedirect.com/science/article/pii/S0925521411000305	not thermography
332	McBride & McBride	2011	SOUTHEASTERN NATURALIST	10	2	384	http://www.jstor.org/stable/pdf/41263022.pdf?refreqid=excelsior%3Ab7afcbbf2e7941190befc2c68bb7d152	not thermography
334	Kamphuis et al	2011	COMPUTERS AND ELECTRONICS IN AGRICULTURE	77	1	86	https://www.sciencedirect.com/science/article/pii/S0168169911000731	not thermography
337	Wells et al	2011	JOURNAL OF TROPICAL ECOLOGY	27	347	4	https://www.cambridge.org/core/services/aop-cambridge-core/content/view/C3605009C914372A73F46AC5B3C15BB5/S0266467411000162a.pdf/pitchers-of-nepenthes-rajah-collect-faecal-droppings-from-both-diurnal-and-nocturnal-small-mammals-and-emit-fruity-odour.pdf	not thermography
339	Hunt et al	2011	AGRONOMY JOURNAL	103	4	1090	https://pubag.nal.usda.gov/download/53737/PDF	not thermography
340	Bougherara et al	2011	JOURNAL OF BIOMECHANICAL ENGINEERING-TRANSACTIONS OF THE ASME	133	7	74503	http://biomechanical.asmedigitalcollection.asme.org/article.aspx?articleid=1407014	not biological
341	Jaumard et al	2011	JOURNAL OF BIOMECHANICAL ENGINEERING-TRANSACTIONS OF THE ASME	133	7	71004	https://biomechanical.asmedigitalcollection.asme.org/article.aspx?articleid=1406936	not thermography
342	Chou et al	2011	BOTANICAL STUDIES	52	3	321	https://ejournal.sinica.edu.tw/bbas/content/2011/3/Bot523-11.pdf	not thermography
344	Huber et al	2011	JOURNAL OF BIOMECHANICS	44	11	2172	https://ac.els-cdn.com/S0021929011004131/1-s2.0-S0021929011004131-main.pdf?_tid=1cee8fd4-bd6c-11e7-bdf1-00000aab0f01&acdnat=1509365950_135d751e5fd40ae220f119df9c2ba6a9	not thermography
347	Urru et al	2011	PHYTOCHEMISTRY	72	13	1655	https://ac.els-cdn.com/S0031942211001002/1-s2.0-S0031942211001002-main.pdf?_tid=b56560a6-bd6e-11e7-9442-00000aacb35f&acdnat=1509367064_b31b659088c15fbf1df0d2f994313084	not thermography
348	Unno et al	2011	LYMPHOLOGY	44	3	113	https://journals.uair.arizona.edu/index.php/lymph/article/viewFile/17034/16827	not thermography
349	Kapfer et al	2011	WILSON JOURNAL OF ORNITHOLOGY	123	3	646	http://www.jstor.org/stable/pdf/23033577.pdf?refreqid=excelsior:04424b9d2140efe6401144742ed87b31	not thermography
350	Monteverde & Piudo	2011	MAMMAL STUDY	36	3	119	http://www.cean.gob.ar/wp-content/uploads/2016/09/Monteverde-et-al.-2011.activity-patterns-of-the-culpeo-fox-in-a-non-hunting-area-of-northwestern.pdf	not thermography
353	Shibayama et al	2011	PLANT PRODUCTION SCIENCE	14	4	365	http://www.tandfonline.com/doi/pdf/10.1626/pps.14.365	not thermography
354	Shibayama et al	2011	PLANT PRODUCTION SCIENCE	14	4	391	http://www.tandfonline.com/doi/pdf/10.1626/pps.14.391	not thermography
355	Ooms & Destain	2011	BIOSYSTEMS ENGINEERING	110	2	168	http://orbi.ulg.ac.be/bitstream/2268/99291/2/BENG_ooms2011_author.pdf	not thermography
357	Gasiorowski et al	2011	VETERINARY SURGERY	40	7	875	http://onlinelibrary.wiley.com/doi/10.1111/j.1532-950X.2011.00894.x/epdf	not biological
358	Rowcliffe	2011	METHODS IN ECOLOGY AND EVOLUTION	2	5	464	http://onlinelibrary.wiley.com/doi/10.1111/j.2041-210X.2011.00094.x/epdf	not thermography
359	Hobbs et al	2011	EQUINE VETERINARY JOURNAL	43	6	686	http://vuir.vu.edu.au/9219/1/Banking%20paper%20Oct%2010%20(1).pdf	not thermography
361	Mori et al	2011	CEREAL RESEARCH COMMUNICATIONS	39	4	551	http://akademiai.com/doi/pdf/10.1556/CRC.39.2011.4.10	not obtained
363	Arngren et al	2011	JOURNAL OF AGRICULTURAL AND FOOD CHEMISTRY	59	21	11385	http://pubs.acs.org/doi/pdf/10.1021/jf202122y	not thermography
364	Livingstone-Lee	2011	BEHAVIOURAL BRAIN RESEARCH	225	1	117	https://www.uvic.ca/socialsciences/psychology/assets/docs/publications/Papers/skelton1-s2.0-S0166432811005158-main.pdf	not thermography
372	Sovic et al	2011	PERIODICUM BIOLOGORUM	113	4	417	http://hrcak.srce.hr/76946	not biological
378	Lunadei et al	2012	POSTHARVEST BIOLOGY AND TECHNOLOGY	63	1	74	https://ac.els-cdn.com/S0925521411001967/1-s2.0-S0925521411001967-main.pdf?_tid=3246f5ee-bf0e-11e7-9e12-00000aacb362&acdnat=1509545515_482b181e1bba5351ac4dda82e78d91e1	not thermography
379	Cristinel et al	2012	12TH INTERNATIONAL MULTIDISCIPLINARY SCIENTIFIC GEOCONFERENCE, SGEM 2012, VOL. V			715	n/a	not thermography
380	Blamires et al	2012	BEHAVIORAL ECOLOGY	23	1	69	https://academic.oup.com/beheco/article/23/1/69/233115	not thermography
382	Wang et al	2012	COMPUTERS AND ELECTRONICS IN AGRICULTURE	80		126	https://ac.els-cdn.com/S016816991100175X/1-s2.0-S016816991100175X-main.pdf?_tid=09675176-bf10-11e7-8f50-00000aacb360&acdnat=1509546305_cfef2402abd311656dd9804e6827506e	not thermography
383	Wang et al	2012	COMPUTERS AND ELECTRONICS IN AGRICULTURE	80		135	https://ac.els-cdn.com/S0168169911002067/1-s2.0-S0168169911002067-main.pdf?_tid=26271120-bf10-11e7-9e42-00000aacb35f&acdnat=1509546354_86e77bdab6cf51df57933f4e99b3f26e	not thermography
384	Fiorelli et al	2012	CIENCIA RURAL	42	1	64	http://www.scielo.br/pdf/cr/v42n1/a1612cr5147.pdf	not biological
388	Aldrich et al	2012	LYMPHATIC RESEARCH AND BIOLOGY	10	1	20	https://www.liebertpub.com/doi/abs/10.1089/lrb.2011.0003	not thermography
389	Silva et al	2012	PLANTA DANINHA	30	1	217	http://www.scielo.br/pdf/pd/v30n1/v30n1a25.pdf	not thermography
390	Fischer et al	2012	FLORA	207	3	159	https://ac.els-cdn.com/S0367253012000023/1-s2.0-S0367253012000023-main.pdf?_tid=619f0c00-bf18-11e7-ac6b-00000aab0f6c&acdnat=1509549889_8415ba7bb84526a36dcce6d53bd998f6	not thermography
391	Garcia-Navas et al	2012	BIRD STUDY	59	2	236	http://www.tandfonline.com/doi/pdf/10.1080/00063657.2012.662939?needAccess=true	not thermography
394	Fritsches	2012	MARINE AND FRESHWATER BEHAVIOUR AND PHYSIOLOGY	45	2	79	http://www.tandfonline.com/doi/pdf/10.1080/10236244.2012.690576?needAccess=true	not thermography
396	Paull et al	2012	WILDLIFE RESEARCH	39	6	546	http://www.publish.csiro.au/wr/pdf/WR12034	not thermography
397	Latham et al	2012	WILDLIFE RESEARCH	39	7	621	http://www.bioone.org/doi/abs/10.1071/WR12050	not thermography
399	Smith & Coulson	2012	AUSTRALIAN MAMMALOGY	34	2	196	https://scholar.google.com/scholar_lookup?doi=10%2E1071%2FAM11034&issn=0310-0049&issue=2&journal=AUSTRALIAN%20MAMMALOGY&hl=en&pages=196-201&title=A%20comparison%20of%20vertical%20and%20horizontal%20camera%20trap%20orientations%20for%20detection%20of%20potoroos%20and%20bandicoots&author=J%20Smith&publication_year=2012&volume=34	not thermography
400	Meek & Pittet	2012	WILDLIFE RESEARCH	39	8	649	http://www.bioone.org/doi/abs/10.1071/WR12138	not thermography
404	Minialga & Paulauskas	2012	MEDICAL PHYSICS IN THE BALTIC STATES			151	http://apps.webofknowledge.com/full_record.do?product=WOS&search_mode=Analyze&qid=12&SID=V12ZTwhh5A4YzLjjW33&excludeEventConfig=ExcludeIfFromFullRecPage&page=37&doc=404	not obtained
405	Martines et al	2012	XXVIII INTERNATIONAL HORTICULTURAL CONGRESS ON SCIENCE AND HORTICULTURE FOR PEOPLE (IHC2010): INTERNATIONAL SYMPOSIUM ON POSTHARVEST TECHNOLOGY IN THE GLOBAL MARKET	934		139	http://www.actahort.org/members/showpdf?booknrarnr=934_15	not thermography
406	Morrow & Nicol	2012	AUSTRALIAN JOURNAL OF ZOOLOGY	60	5	289	http://www.publish.csiro.au/zo/pdf/ZO12066	not thermography
412	Schwean-Lardner et al	2012	APPLIED ANIMAL BEHAVIOUR SCIENCE	137	1	43	https://ac.els-cdn.com/S0168159112000287/1-s2.0-S0168159112000287-main.pdf?_tid=090da2ee-c095-11e7-9219-00000aab0f6b&acdnat=1509713379_7c07754722450c4b60fc9f3988613b68	not thermography
413	Howarth & Callaghan	2012	JOURNAL OF BIOMECHANICS	45	3	484	https://ac.els-cdn.com/S0021929011007457/1-s2.0-S0021929011007457-main.pdf?_tid=3aaed66a-c095-11e7-b611-00000aacb362&acdnat=1509713462_23267ce8012e304e1aeefa7d540b5c3d	not thermography
414	Rossi et al	2012	JOURNAL OF PHOTOCHEMISTRY AND PHOTOBIOLOGY B-BIOLOGY	107		73	https://ac.els-cdn.com/S101113441100265X/1-s2.0-S101113441100265X-main.pdf?_tid=248573fa-c0a2-11e7-8dd7-00000aacb360&acdnat=1509719015_e77e0438258bc8e88579e801881d015d	not thermography
419	Luna et al	2012	JOURNAL OF BIOMECHANICAL ENGINEERING-TRANSACTIONS OF THE ASME	134	3	31008	http://biomechanical.asmedigitalcollection.asme.org/article.aspx?articleid=1475398	not biological
421	Leite et al	2012	CIENCIA E AGROTECNOLOGIA	36	2	217	http://www.scielo.br/pdf/cagro/v36n2/11.pdf	not thermography
422	Sakamoto et al	2012	AGRICULTURAL AND FOREST METEOROLOGY	154		113	https://ac.els-cdn.com/S0168192311003133/1-s2.0-S0168192311003133-main.pdf?_tid=4a11510c-c0a7-11e7-8b05-00000aacb35e&acdnat=1509721219_6e3cb5eb5be5cf7a13f129d804634c02	not thermography
424	Szendro et al	2012	ANIMAL	6	4	650	https://www.cambridge.org/core/services/aop-cambridge-core/content/view/32CBC785C696C10D07FC77DBD9DE517C/S1751731111001819a.pdf/use-of-different-areas-of-pen-by-growing-rabbits-depending-on-the-elevated-platforms-floor-type.pdf	not thermography
425	Enders & Vander Wall	2012	OIKOS	121	4	589	https://onlinelibrary.wiley.com/doi/full/10.1111/j.1600-0706.2011.19710.x	not thermography
428	Dougherty & Bowman	2012	POPULATION ECOLOGY	54	2	357	https://link.springer.com/content/pdf/10.1007%2Fs10144-012-0311-z.pdf	not thermography
430	Duma & Giurgiu	2012	FOLIA ZOOLOGICA	61	1	49	http://www.ivb.cz/folia_zoologica/archive/61_49-53.pdf	not thermography
431	Baker et al	2012	HERPETOLOGICAL JOURNAL	22	2	79	http://www.ingentaconnect.com/contentone/bhs/thj/2012/00000022/00000002/art00003	not thermography
432	Samejima et al	2012	FOREST ECOLOGY AND MANAGEMENT	270		248	https://ac.els-cdn.com/S0378112712000163/1-s2.0-S0378112712000163-main.pdf?_tid=f12bc7ca-c0ab-11e7-9701-00000aacb361&acdnat=1509723217_99e3504c33c705130ba9f09c509b37f9	not thermography
435	Morelli et al	2012	JOURNAL OF VETERINARY INTERNAL MEDICINE	26	3	763	http://onlinelibrary.wiley.com/doi/10.1111/j.1939-1676.2012.00937.x/abstract	isolated abstract
436	Chen & Bao	2012	ASIAN-AUSTRALASIAN JOURNAL OF ANIMAL SCIENCES	25	5	717	https://www.ncbi.nlm.nih.gov/pmc/articles/PMC4093118/pdf/ajas-25-5-717-17.pdf	not thermography
438	Sakamoto et al	2012	PRECISION AGRICULTURE	13	3	285	https://link.springer.com/content/pdf/10.1007%2Fs11119-011-9246-1.pdf	not thermography
439	Ahamed et al	2012	BIOSYSTEMS ENGINEERING	112	2	93	https://ac.els-cdn.com/S1537511012000414/1-s2.0-S1537511012000414-main.pdf?_tid=5ff6a968-c0b1-11e7-839c-00000aacb362&acdnat=1509725551_744133302b511793f0b4f51136356a60	not thermography
440	Ellis-Felege et al	2012	JOURNAL OF APPLIED ECOLOGY	49	3	661	http://onlinelibrary.wiley.com/doi/10.1111/j.1365-2664.2012.02126.x/epdf	not thermography
443	Thompson	2012	INTERNATIONAL SUGAR JOURNAL	114	1362	398		not biological
444	Racheva et al	2012	ACTA ZOOLOGICA BULGARICA	64	2	145	https://scholar.google.com/scholar_lookup?author=V%20Racheva&atitle=Camera%20Traps%20Recorded%20Use%20of%20Sett%20Sites%20by%20Badgers%20(Meles%20meles%20L.,%20Mammalia)%20in%20Different%20Habitats&publication_year=2012&hl=en&journal=ACTA%20ZOOLOGICA%20BULGARICA&volume=64&issue=2&pages=145-150&issn=0324-0770	not thermography
445	Tyller et al	2012	ACTA ORNITHOLOGICA	47	1	79	http://www.zoologie.upol.cz/remes/publ/ActaOrn_2012_Tylleretal.pdf	not thermography
446	Demers & Robinson-Nilsen	2012	JOURNAL OF FISH AND WILDLIFE MANAGEMENT	3	1	123	http://www.fwspubs.org/doi/pdf/10.3996/062011-JFWM-036	not thermography
447	Wells et al	2012	PHILOSOPHICAL TRANSACTIONS OF THE ROYAL SOCIETY B-BIOLOGICAL SCIENCES	367	1595	1517	https://www.ncbi.nlm.nih.gov/pmc/articles/PMC3321695/pdf/rstb20110291.pdf	not thermography
448	Alves et al	2012	Revista Brasileira de Ciência Avícola	14	3	223	saved	not obtained
451	Hardin et al	2012	HORTSCIENCE	47	7	955	http://hortsci.ashspublications.org/content/47/7/955.full.pdf+html	not thermography
456	Guillen-Climent et al	2012	PRECISION AGRICULTURE	13	4	473	https://link.springer.com/content/pdf/10.1007%2Fs11119-012-9263-8.pdf	not thermography
458	Kohl et al	2012	JOURNAL OF EXPERIMENTAL BIOLOGY	215	15	2630	http://jeb.biologists.org/content/jexbio/215/15/2630.full.pdf	not thermography
464	Lebourgeois et al	2012	PRECISION AGRICULTURE	13	5	525	https://link.springer.com/content/pdf/10.1007%2Fs11119-012-9262-9.pdf	not thermography
467	Yang	2012	COMPUTERS AND ELECTRONICS IN AGRICULTURE	88		13	https://ac.els-cdn.com/S0168169912001755/1-s2.0-S0168169912001755-main.pdf?_tid=53d50296-c56c-11e7-8608-00000aab0f01&acdnat=1510245651_8b13751418de0e241e86672b73f4e727	not thermography
468	Shibayama et al	2012	PLANT PRODUCTION SCIENCE	15	4	293	http://www.tandfonline.com/doi/pdf/10.1626/pps.15.293	not thermography
470	Schwencke et al	2012	VETERINARY SURGERY	41	7	829	https://onlinelibrary.wiley.com/doi/full/10.1111/j.1532-950X.2012.01021.x	not thermography
471	Antikainen et al	2012	HOLZFORSCHUNG	66	7	877	https://www.degruyter.com/view/j/hfsg.2012.66.issue-7/hf-2011-0131/hf-2011-0131.xml	not obtained
474	Absalan et al	2012	JOURNAL OF THERMAL BIOLOGY	37	7	490	https://ac.els-cdn.com/S0306456512000903/1-s2.0-S0306456512000903-main.pdf?_tid=77bd74ba-c56f-11e7-82a5-00000aab0f6b&acdnat=1510247000_c6be27c9b21faa94256a13ce13c9fcb4	not biological
479	Chen et al	2012	COMPUTERS AND ELECTRONICS IN AGRICULTURE	89		100	https://ac.els-cdn.com/S0168169912002074/1-s2.0-S0168169912002074-main.pdf?_tid=2f4f46b8-c574-11e7-bad8-00000aacb361&acdnat=1510249026_9416f4cdfd25a0b8489897ed2bc72dea	not thermography
481	Main et al	2012	VETERINARY RECORD	171	20		http://veterinaryrecord.bmj.com/content/vetrec/early/2012/09/07/vr.100533.full.pdf	not thermography
483	Samseemoung et al	2012	PRECISION AGRICULTURE	13	6	611	https://link.springer.com/article/10.1007/s11119-012-9271-8	not thermography
484	Corcaran & Conner	2012	JOURNAL OF EXPERIMENTAL BIOLOGY	215	24	4278	http://www.sonarjamming.com/Corcoran_and_Conner2012JEB.pdf	not thermography
485	Allema et al	2012	JOURNAL OF APPLIED ENTOMOLOGY	136	10	793	https://onlinelibrary.wiley.com/doi/full/10.1111/j.1439-0418.2012.01728.x	not thermography
489	Okitsu et al	2012	LYMPHOLOGY	45	4	165	https://scholar.google.com/scholar_lookup?issn=0024-7766&issue=4&journal=LYMPHOLOGY&hl=en&pages=165-176&pmid=23700763&title=NATURAL%20HISTORY%20OF%20LYMPH%20PUMPING%20PRESSURE%20AFTER%20PELVIC%20LYMPHADENECTOMY&author=T%20Okitsu&publication_year=2012&volume=45	not thermography
490	Cheng et al	2013	INTERNATIONAL MECHANICAL ENGINEERING CONGRESS AND EXPOSITION - 2012, VOL 2: BIOMEDICAL AND BIOTECHNOLOGY			127	https://www.ncbi.nlm.nih.gov/pmc/articles/PMC3874242/pdf/nihms-468661.pdf	not biological
491	Chanmugam et al	2013	INTERNATIONAL MECHANICAL ENGINEERING CONGRESS AND EXPOSITION - 2012, VOL 2: BIOMEDICAL AND BIOTECHNOLOGY			135	https://www.ncbi.nlm.nih.gov/pmc/articles/PMC4199207/pdf/nihms-468671.pdf	not biological
492	Zhou et al	2013	INTERNATIONAL MECHANICAL ENGINEERING CONGRESS AND EXPOSITION - 2012, VOL 2: BIOMEDICAL AND BIOTECHNOLOGY			449	https://scholar.google.co.uk/scholar?hl=en&as_sdt=0%2C5&q=STUDY+ON+THE+EARLY+DIAGNOSIS+OF+CANCER+INVERSION+PROBLEM+BASED+ON+THE+INFRARED+THERMOGRAPHY&btnG=	not biological
493	Masaitis & Mozgeris	2013	RESEARCH FOR RURAL DEVELOPMENT 2013, VOL 2			20	http://llufb.llu.lv/conference/Research-for-Rural-Development/2013/LatviaResearchRuralDevel19th_volume2.pdf#page=20	not thermography
497	Meek et al	2013	AUSTRALIAN MAMMALOGY	35	1	123	http://www.publish.csiro.au/am/am12014	not thermography
500	Egg et al	2013	CHRONOBIOLOGY INTERNATIONAL	30	4	510	http://www.tandfonline.com/doi/abs/10.3109/07420528.2012.754447	not thermography
504	Costa et al	2013	ACTA VETERINARIA BRNO	82	1	25	https://actavet.vfu.cz/media/pdf/avb_2013082010025.pdf	not thermography
506	Nagy & Tamas	2013	COMMUNICATIONS IN SOIL SCIENCE AND PLANT ANALYSIS	44	1	366	http://www.tandfonline.com/doi/pdf/10.1080/00103624.2013.742308?needAccess=true	not thermography
508	Rey et al	2013	PRECISION AGRICULTURE '13			617	n/a	not thermography
512	Hohnen et al	2013	AUSTRALIAN MAMMALOGY	35	2	131	https://www.researchgate.net/profile/Katherine_Tuft/publication/265014845_Individual_identification_of_northern_quolls_Dasyurus_hallucatus_using_remote_cameras/links/53fc07040cf2dca8fffee7e1.pdf	not thermography
514	Gaikwad et al	2013	PROCEEDINGS OF THE 9TH WORLD ASSOCIATION FOR LASER THERAPY CONGRESS (WALT)			29	http://apps.webofknowledge.com/full_record.do?product=WOS&search_mode=Analyze&qid=12&SID=D2shyRnzWrqbw37yw6o&excludeEventConfig=ExcludeIfFromFullRecPage&page=49&doc=514	not obtained
516	He et al	2013	OPTICAL TOMOGRAPHY AND SPECTROSCOPY OF TISSUE X	8578		85781J	https://www.researchgate.net/publication/271541211_Development_of_transrectal_diffuse_optical_tomography_combined_with_3D-transrectal_ultrasound_imaging_to_monitor_the_photocoagulation_front_during_interstitial_photothermal_therapy_of_primary_focal_pr	not thermography
517	Selb et al	2013	OPTICAL TOMOGRAPHY AND SPECTROSCOPY OF TISSUE X	8578		857807	https://www.spiedigitallibrary.org/conference-proceedings-of-spie/8578/1/Functional-brain-imaging-with-a-supercontinuum-time-domain-NIRS-system/10.1117/12.2005348.pdf	not thermography
519	Hewitt & Winfield	2013	BIOLOGY AND MANAGEMENT OF COREGONID FISHES - 2011	64		333	http://www.schweizerbart.de/papers/adv_limnology/list/64#issue	not thermography
521	Neto et al	2013	BUFFALO BULLETIN	32	2	1145	http://ibic.lib.ku.ac.th/e-Bulletin/32-sp2.pdf	isolated abstract
522	Makino et al	2013	II ASIA PACIFIC SYMPOSIUM ON POSTHARVEST RESEARCH EDUCATION AND EXTENSION (APS2012)	1101		443	http://pkht.ipb.ac.id/wp-content/uploads/2015/11/2013.-Acta-Hort.-1011-November-2013-pp-443-450-Non-Destructive-Analysis-of-Internal-and-External-Qualities-of-MangoFruits-during-Storage-by-Hyperspectral-Imaging.pdf	not thermography
523	Salengke & Muralim	2013	IV INTERNATIONAL SYMPOSIUM ON TROPICAL AND SUBTROPICAL FRUITS	975		505	http://www.actahort.org/members/showpdf?booknrarnr=975_66	not thermography
524	Syaefullah et al	2013	IV INTERNATIONAL SYMPOSIUM ON TROPICAL AND SUBTROPICAL FRUITS	975		547	http://www.actahort.org/members/showpdf?booknrarnr=975_72	not thermography
525	Mozgeris & Augustaitis	2013	IFOREST-BIOGEOSCIENCES AND FORESTRY	6		15	http://www.sisef.it/iforest/contents/?id=ifor0705-006	not thermography
526	Eigirdas et al	2013	IFOREST-BIOGEOSCIENCES AND FORESTRY	6		23	http://www.sisef.it/iforest/contents/?id=ifor0721-006	not thermography
535	Aboodarda et al	2013	INTERNATIONAL JOURNAL OF SPORTS PHYSIOLOGY AND PERFORMANCE	8	2	181	https://umexpert.um.edu.my/file/publication/00004676_82541.pdf	not thermography
538	Hall et al	2013	BEHAVIOURAL PROCESSES	94		76	https://ac.els-cdn.com/S0376635712002732/1-s2.0-S0376635712002732-main.pdf?_tid=1c95103c-cac6-11e7-8fb3-00000aacb360&acdnat=1510833969_bdd196cf341d22d149652c53d4ac0ca6	not thermography
539	Ikeda et al	2013	MAMMAL STUDY	38	1	29	http://www.bioone.org/doi/abs/10.3106/041.038.0103	not thermography
544	Langland et al	2013	INTEGRATIVE AND COMPARATIVE BIOLOGY	53	E315	1		isolated abstract
549	Schbbler et al	2013	JOURNAL OF MAMMALOGY	94	2	448	https://academic.oup.com/jmammal/article/94/2/448/911514	not thermography
551	de Souza et al	2013	INTERNATIONAL JOURNAL OF BIOMETEOROLOGY	57	3	377	https://link.springer.com/content/pdf/10.1007%2Fs00484-012-0561-7.pdf	retracted article
557	Cao et al	2013	JOURNAL OF MECHANICS IN MEDICINE AND BIOLOGY	13	3	1350028	http://www.worldscientific.com/doi/abs/10.1142/S0219519413500280	not obtained
560	Rollack et al	2013	JOURNAL OF RAPTOR RESEARCH	47	2	153	https://scholar.google.com/scholar_lookup?author=C%20Rollack&atitle=TURKEY%20VULTURE%20BREEDING%20BEHAVIOR%20STUDIED%20WITH%20TRAIL%20CAMERAS&publication_year=2013&hl=en&journal=JOURNAL%20OF%20RAPTOR%20RESEARCH&volume=47&issue=2&pages=153-160&issn=0892-1016&doi=10.3356/JRR-12-40.1	not thermography
563	Choi et al	2013	APPLIED ERGONOMICS	44	4	538	https://ac.els-cdn.com/S0003687012001810/1-s2.0-S0003687012001810-main.pdf?_tid=23d27384-caf9-11e7-800f-00000aacb35e&acdnat=1510855886_15cf0a392e9500ebf2f8eb1d594450c6	not thermography
564	Knoth et al	2013	APPLIED VEGETATION SCIENCE	16	3	509	http://onlinelibrary.wiley.com/doi/10.1111/avsc.12024/epdf	not thermography
565	Mccallum	2013	MAMMAL REVIEW	43	3	196	http://onlinelibrary.wiley.com/doi/10.1111/j.1365-2907.2012.00216.x/epdf	not thermography
566	Rivers & Morin	2013	BEHAVIORAL ECOLOGY	24	4	877	https://academic.oup.com/beheco/article/24/4/877/220037	not thermography
567	Fan et al	2013	MICROSCOPY RESEARCH AND TECHNIQUE	76	7	744	http://onlinelibrary.wiley.com/doi/10.1002/jemt.22225/epdf	not thermography
570	Taylor et al	2013	VETERINARY RADIOLOGY & ULTRASOUND	54	4	332	http://onlinelibrary.wiley.com/doi/10.1111/vru.12025/epdf	not thermography
576	Barasona et al	2013	PREVENTIVE VETERINARY MEDICINE	111	1	42	https://ac.els-cdn.com/S0167587713001001/1-s2.0-S0167587713001001-main.pdf?_tid=10e8e0e2-cb7f-11e7-a916-00000aab0f01&acdnat=1510913407_1eadc65195313f02f9421e370a806271	not thermography
579	Dubofsky et al	2013	BIOLOGICAL BULLETIN	225	1	49	http://www.jstor.org/stable/pdf/23595255.pdf	not thermography
580	Herichova et al	2013	REGULATORY PEPTIDES	186		49	https://ac.els-cdn.com/S0167011513001043/1-s2.0-S0167011513001043-main.pdf?_tid=e0c28ea6-cb81-11e7-badc-00000aab0f6c&acdnat=1510914614_946e9e6c2f02f5ebaf0e32b2da2f7cf1	not thermography
581	Dearworth et al	2013	JOURNAL OF COMPARATIVE NEUROLOGY	521	15	3464	http://onlinelibrary.wiley.com/doi/10.1002/cne.23361/epdf	not thermography
582	Regev-Shoshani et al	2013	RESEARCH IN VETERINARY SCIENCE	95	2	606	https://ac.els-cdn.com/S0034528813002154/1-s2.0-S0034528813002154-main.pdf?_tid=5742cfaa-cb82-11e7-9088-00000aacb360&acdnat=1510914821_ea999f23a0846e15e5e766632b4548dd	not thermography
584	Tettamanti et al	2013	JOURNAL OF ELECTROMYOGRAPHY AND KINESIOLOGY	23	5	1222	https://ac.els-cdn.com/S1050641113001570/1-s2.0-S1050641113001570-main.pdf?_tid=c74b67d8-cb84-11e7-952b-00000aacb35e&acdnat=1510915869_2710d360d4dcb99cccf1cf68e536d7b4	not thermography
585	Duma	2013	ACTA THERIOLOGICA	58	4	419	https://link.springer.com/content/pdf/10.1007%2Fs13364-013-0139-8.pdf	not thermography
586	Padra & Salva	2013	MATHEMATICAL BIOSCIENCES	245	2	103	https://ac.els-cdn.com/S002555641300165X/1-s2.0-S002555641300165X-main.pdf?_tid=a2fa5c80-cb85-11e7-8cf7-00000aacb35f&acdnat=1510916237_75b08160746a2f301993000c603ef2c5	not biological
588	Brownlee-Bouboulis & Reeder	2013	JOURNAL OF WILDLIFE DISEASES	49	4	850	http://www.jwildlifedis.org/doi/pdf/10.7589/2012-10-242	not thermography
592	Kurz et al	2013	AMERICAN MIDLAND NATURALIST	170	2	260	http://www.jstor.org/stable/pdf/23525574.pdf	not thermography
594	Kakareko et al	2013	BIOLOGICAL INVASIONS	15	11	2519	https://link.springer.com/content/pdf/10.1007%2Fs10530-013-0470-7.pdf	not thermography
595	Shikanga et al	2013	PHYTOCHEMICAL ANALYSIS	24	6	550	http://onlinelibrary.wiley.com/doi/10.1002/pca.2431/epdf	not thermography
596	Dizney & Dearning	2013	ANIMAL BEHAVIOUR	86	5	911	https://ac.els-cdn.com/S0003347213003680/1-s2.0-S0003347213003680-main.pdf?_tid=4c8e0e8a-ce9d-11e7-90b4-00000aab0f27&acdnat=1511256245_9def8aa52b81c2fdb362a4c3a19ebb5f	not thermography
597	Iida et al	2013	JOURNAL OF SMALL ANIMAL PRACTICE	54	11	594	http://onlinelibrary.wiley.com/doi/10.1111/jsap.12148/epdf	not thermography
598	Essig et al	2013	AMERICAN JOURNAL OF VETERINARY RESEARCH	74	11	1428	https://avmajournals.avma.org/doi/pdf/10.2460/ajvr.74.11.1428	not thermography
599	Toth & Dikker	2013	PFERDEHEILKUNDE	29	6	700	saved	not thermography
600	Ramji et al	2013	RAFFLES BULLETIN OF ZOOLOGY		29	225	https://scholar.google.co.uk/scholar?hl=en&as_sdt=0%2C5&q=ROOSTING+AND+NEST-BUILDING+BEHAVIOUR+OF+THE+WHITE-NEST+SWIFTLET+AERODRAMUS+FUCIPHAGUS+%28THUNBERG%29+%28AVES%3A+APODIDAE%29+IN+FARMED+COLONIES&btnG=	not thermography
603	Eisersio et al	2013	VETERINARY JOURNAL	198	1	E33	https://ac.els-cdn.com/S1090023313004589/1-s2.0-S1090023313004589-main.pdf?_tid=bf0557a4-cea0-11e7-82e6-00000aacb35f&acdnat=1511257725_dcaeb26b8d046098862fd44323519c0b	not thermography
604	Northrop et al	2013	VETERINARY JOURNAL	198	1	E137	https://ac.els-cdn.com/S1090023313004760/1-s2.0-S1090023313004760-main.pdf?_tid=f65d31cc-cea0-11e7-a88e-00000aacb362&acdnat=1511257818_4036063170501a669dcfc76bd1a40151	not thermography
605	Baranowski et al	2013	POSTHARVEST BIOLOGY AND TECHNOLOGY	86		249	https://ac.els-cdn.com/S0925521413002093/1-s2.0-S0925521413002093-main.pdf?_tid=3b46b4b6-cea1-11e7-beb1-00000aab0f6b&acdnat=1511257942_ec5d112d1452da9cd76f29ba9df45f9b	not thermography
606	Lorente et al	2013	POSTHARVEST BIOLOGY AND TECHNOLOGY	86		424	https://ac.els-cdn.com/S0925521413002251/1-s2.0-S0925521413002251-main.pdf?_tid=a408847a-cea1-11e7-8eda-00000aab0f27&acdnat=1511258109_7032bebca4e83a1fb160bc88651abe2a	not thermography
609	Montanholi et al	2013	CANADIAN JOURNAL OF ANIMAL SCIENCE	93	4	487	http://www.nrcresearchpress.com/doi/pdf/10.4141/cjas2013-054	not thermography
615	Antonucci et al	2013	JOURNAL OF PLANT DISEASES AND PROTECTION	120	5	205	http://www.jstor.org/stable/43855767?seq=1#page_scan_tab_contents	not obtained
617	Meek et al	2014	CAMERA TRAPPING: WILDLIFE MANAGEMENT AND RESEARCH			101	https://books.google.co.uk/books?hl=en&lr=&id=JT2nBQAAQBAJ&oi=fnd&pg=PA111&dq=The+effect+of+camera+trap+type+on+the+probability+of+detecting+different+size+classes+of+Australian+mammals&ots=MZqSUurqdh&sig=y5o0_SMUGj_EAAQRVgPB0ibhjqc#v=onepage&q=The%20effect%20of%20camera%20trap%20type%20on%20the%20probability%20of%20detecting%20different%20size%20classes%20of%20Australian%20mammals&f=false	not thermography
618	Urlus et al	2014	CAMERA TRAPPING: WILDLIFE MANAGEMENT AND RESEARCH			111	https://books.google.co.uk/books?hl=en&lr=&id=JT2nBQAAQBAJ&oi=fnd&pg=PA111&dq=The+effect+of+camera+trap+type+on+the+probability+of+detecting+different+size+classes+of+Australian+mammals&ots=MZqSUurqdh&sig=y5o0_SMUGj_EAAQRVgPB0ibhjqc#v=onepage&q=The%20effect%20of%20camera%20trap%20type%20on%20the%20probability%20of%20detecting%20different%20size%20classes%20of%20Australian%20mammals&f=false	not thermography
619	Ballard et al	2014	CAMERA TRAPPING: WILDLIFE MANAGEMENT AND RESEARCH			189	https://books.google.co.uk/books?hl=en&lr=&id=JT2nBQAAQBAJ&oi=fnd&pg=PA111&dq=The+effect+of+camera+trap+type+on+the+probability+of+detecting+different+size+classes+of+Australian+mammals&ots=MZqSUurqdh&sig=y5o0_SMUGj_EAAQRVgPB0ibhjqc#v=onepage&q=The%20effect%20of%20camera%20trap%20type%20on%20the%20probability%20of%20detecting%20different%20size%20classes%20of%20Australian%20mammals&f=false	not thermography
620	Claridge et al	2014	CAMERA TRAPPING: WILDLIFE MANAGEMENT AND RESEARCH			205	http://apps.webofknowledge.com/full_record.do?product=WOS&search_mode=Analyze&qid=12&SID=F5QiRTardouPiHK1SkW&excludeEventConfig=ExcludeIfFromFullRecPage&page=60&doc=620	not thermography
621	Vernes et al	2014	CAMERA TRAPPING: WILDLIFE MANAGEMENT AND RESEARCH			215	http://apps.webofknowledge.com/full_record.do?product=WOS&search_mode=Analyze&qid=12&SID=F5QiRTardouPiHK1SkW&excludeEventConfig=ExcludeIfFromFullRecPage&page=60&doc=621	not thermography
622	Welbourne	2014	CAMERA TRAPPING: WILDLIFE MANAGEMENT AND RESEARCH			225	http://apps.webofknowledge.com/full_record.do?product=WOS&search_mode=Analyze&qid=12&SID=F5QiRTardouPiHK1SkW&excludeEventConfig=ExcludeIfFromFullRecPage&page=60&doc=622	not thermography
623	Harley et al	2014	CAMERA TRAPPING: WILDLIFE MANAGEMENT AND RESEARCH			233	http://apps.webofknowledge.com/full_record.do?product=WOS&search_mode=Analyze&qid=12&SID=F5QiRTardouPiHK1SkW&excludeEventConfig=ExcludeIfFromFullRecPage&page=60&doc=623	not thermography
624	Driessen & Jarman	2014	CAMERA TRAPPING: WILDLIFE MANAGEMENT AND RESEARCH			253	http://apps.webofknowledge.com/full_record.do?product=WOS&search_mode=Analyze&qid=12&SID=F5QiRTardouPiHK1SkW&excludeEventConfig=ExcludeIfFromFullRecPage&page=60&doc=624	not thermography
625	Weerakoon et al	2014	CAMERA TRAPPING: WILDLIFE MANAGEMENT AND RESEARCH			625	http://apps.webofknowledge.com/full_record.do?product=WOS&search_mode=Analyze&qid=12&SID=F5QiRTardouPiHK1SkW&excludeEventConfig=ExcludeIfFromFullRecPage&page=60&doc=625	not thermography
626	Dominguez et al	2014	VII CONGRESO IBERICO DE AGROINGENIERIA Y CIENCIAS HORTICOLAS: INNOVAR Y PRODUCIR PARA EL FUTURO. INNOVATING AND PRODUCING FOR THE FUTURE			626	n/a	not thermography
629	Rabatel et al	2014	BIOSYSTEMS ENGINEERING	117		2	https://ac.els-cdn.com/S1537511013000962/1-s2.0-S1537511013000962-main.pdf?_tid=eedab2b6-ceb0-11e7-81e8-00000aab0f6b&acdnat=1511264677_ce6c845e8bb37891bce82283172ffa48	not thermography
630	Schmilovitch et al	2014	BIOSYSTEMS ENGINEERING	117		83	https://ac.els-cdn.com/S1537511013001104/1-s2.0-S1537511013001104-main.pdf?_tid=3361ee04-ceb1-11e7-9507-00000aab0f6c&acdnat=1511264793_647ec687baecb72ae945378b708f5175	not thermography
633	Grandisoli et al	2014	LASERS IN DENTISTRY XX	8929			http://repositorio.ipen.br:8080/xmlui/bitstream/handle/123456789/23818/20864.pdf?sequence=1&isAllowed=y	not thermography
634	Simon et al	2014	LASERS IN DENTISTRY XX	8929			https://www.ncbi.nlm.nih.gov/pmc/articles/PMC4013109/pdf/nihms574975.pdf	not thermography
636	Taylor et al	2014	AUSTRALIAN MAMMALOGY	36	1	60	http://www.publish.csiro.au/am/am13012	not thermography
638	Costa et al	2014	ANIMAL PRODUCTION SCIENCE	54	8	1075	https://scholar.google.com/scholar_lookup?author=A%20Costa&atitle=Image-processing%20technique%20to%20measure%20pig%20activity%20in%20response%20to%20climatic%20variation%20in%20a%20pig%20barn&publication_year=2014&hl=en&journal=ANIMAL%20PRODUCTION%20SCIENCE&volume=54&issue=8&pages=1075-1083&issn=1836-0939&doi=10.1071/AN13031	not thermography
639	Johnston et al	2014	INTERNATIONAL JOURNAL OF WILDLAND FIRE	23	4	463	http://www.publish.csiro.au/WF/WF12197	not obtained
640	Uehara et al	2014	JAPANESE JOURNAL OF APPLIED ENTOMOLOGY AND ZOOLOGY	58	1	36	saved	not thermography
641	Kim et al	2014	ANIMAL PRODUCTION SCIENCE	54	9	1476	http://www.publish.csiro.au/an/AN14150	not obtained
644	Dumke et al	2014	PHOTOCHEMICAL & PHOTOBIOLOGICAL SCIENCES	13	9	1270	http://pubs.rsc.org/en/content/articlehtml/2014/pp/c4pp00030g	not thermography
645	Fox et al	2014	NATURAL AREAS JOURNAL	34	1	46	saved	not thermography
646	Cicchi et al	2014	BIOPHOTONICS: PHOTONIC SOLUTIONS FOR BETTER HEALTH CARE IV	9129		UNSP 912932	n/a	not thermography
647	Lin et al	2014	BIOPHOTONICS: PHOTONIC SOLUTIONS FOR BETTER HEALTH CARE IV	9129		UNSP 912920	https://www.researchgate.net/profile/Defu_Chen/publication/277680268_Direct_imaging_of_singlet_oxygen_luminescence_generated_in_blood_vessels_during_photodynamic_therapy/links/5575082408ae7521586a9a20.pdf	not thermography
648	Powolny et al	2014	BIOPHOTONICS: PHOTONIC SOLUTIONS FOR BETTER HEALTH CARE IV	9129		UNSP 912938	http://ens.ewi.tudelft.nl/pubs/powolny14spie.pdf	not thermography
651	Diago et al	2014	VII INTERNATIONAL SYMPOSIUM ON IRRIGATION OF HORTICULTURAL CROPS	1038		89	http://www.actahort.org/members/showpdf?booknrarnr=1038_9	not thermography
654	Svoboda et al	2014	ACTA OF BIOENGINEERING AND BIOMECHANICS	16	3	89	http://yadda.icm.edu.pl/baztech/element/bwmeta1.element.baztech-f8e4b4e8-91d1-485f-8844-d36e4d1c2687	not thermography
656	Hruska et al	2014	ECOSCIENCE	21	1	46	saved	not thermography
658	Korpela et al	2014	SILVA FENNICA	48	3	1087	https://www.silvafennica.fi/article/1087/keyword/forestry	not thermography
659	Major et al	2014	WILDLIFE RESEARCH	41	7	598	http://www.publish.csiro.au/wr/wr14136	not thermography
660	Paula et al	2014	WILDLIFE RESEARCH	41	8	717	http://www.bioone.org/doi/abs/10.1071/WR14063	not thermography
661	Danusevicius et al	2014	SILVAE GENETICA	63	4	169	https://www.degruyter.com/downloadpdf/j/sg.2014.63.issue-1-6/sg-2014-0022/sg-2014-0022.pdf	not thermography
664	Bhowmik et al	2014	PROCEEDINGS OF THE ASME INTERNATIONAL MECHANICAL ENGINEERING CONGRESS AND EXPOSITION, 2013, VOL 3A			V03AT03A064	https://scholar.google.co.uk/scholar?hl=en&as_sdt=0%2C5&q=DETECTION+OF+SUBSURFACE+SKIN+LESION+USING+FREQUENCY+MODULATED+THERMAL+WAVE+IMAGING%3A+A+NUMERICAL+STUDY&btnG=	not biological
665	Nijland et al	2014	AGRICULTURAL AND FOREST METEOROLOGY	184		98	https://ac.els-cdn.com/S0168192313002621/1-s2.0-S0168192313002621-main.pdf?_tid=2352c9a2-cee3-11e7-8761-00000aab0f27&acdnat=1511286240_642bd3d35f45b9daa02a68af39b905c7	not thermography
666	Mills et al	2014	JOURNAL OF BIOMECHANICS	47	2	575	https://ac.els-cdn.com/S0021929013005952/1-s2.0-S0021929013005952-main.pdf?_tid=6ad31ba6-cee3-11e7-8e7b-00000aacb361&acdnat=1511286360_efe2a979ac5b5056c4f366d131b16a90	not thermography
668	Swan et al	2014	BIODIVERSITY AND CONSERVATION	23	2	343	https://link.springer.com/content/pdf/10.1007%2Fs10531-013-0604-3.pdf	not thermography
674	Miljeteig et al	2014	JOURNAL OF EXPERIMENTAL MARINE BIOLOGY AND ECOLOGY	451		16	https://ac.els-cdn.com/S0022098113003730/1-s2.0-S0022098113003730-main.pdf?_tid=c9690d5c-cf6e-11e7-b5b7-00000aacb35d&acdnat=1511346227_00280e214b8b137ce5528d09c85db6c5	not thermography
675	Kunter & Seker	2014	JOURNAL OF MECHANICS IN MEDICINE AND BIOLOGY	14	1	1450009	saved	not thermography
678	Tsuda et al	2014	AQUACULTURE	422		136	https://ac.els-cdn.com/S0044848613006479/1-s2.0-S0044848613006479-main.pdf?_tid=9052e5b4-cf83-11e7-a8bd-00000aacb35f&acdnat=1511355143_cd2131f327e68f9142a78e0692c07954	not thermography
681	Kojima et al	2014	ZOOLOGICAL SCIENCE	31	3	109	http://www.bioone.org/doi/pdf/10.2108/zsj.31.109	not thermography
682	Muheim et al	2014	JOURNAL OF FIELD ORNITHOLOGY	85	1	91	https://scholar.google.com/scholar_lookup?author=R%20Muheim&atitle=BirdOriTrack:%20a%20new%20video-tracking%20program%20for%20orientation%20research%20with%20migratory%20birds&publication_year=2014&hl=en&journal=JOURNAL%20OF%20FIELD%20ORNITHOLOGY&volume=85&issue=1&pages=91-105&issn=0273-8570&doi=10.1111/jofo.12053	not thermography
689	Engstrom & Radzio	2014	CASTANEA	79	1	27	http://www.jstor.org/stable/pdf/24620658.pdf	not thermography
691	Levy et al	2014	AMERICAN JOURNAL OF HUMAN BIOLOGY	26	2	270	n/a	isolated abstract
692	Boye et al	2014	JOURNAL OF BIOMECHANICS	47	5	1220	https://ac.els-cdn.com/S0021929013006453/1-s2.0-S0021929013006453-main.pdf?_tid=a8880690-cf93-11e7-91e9-00000aab0f6c&acdnat=1511362055_d86644ce2501ceb91fae1ba1a1365184	not thermography
693	Zarco-Tejada et al	2014	EUROPEAN JOURNAL OF AGRONOMY	55		89	https://ac.els-cdn.com/S1161030114000069/1-s2.0-S1161030114000069-main.pdf?_tid=c5397e72-cf93-11e7-8bbb-00000aacb360&acdnat=1511362103_c98cd2cba0f0b1519d489c8518a07ea2	not thermography
697	Paul et al	2014	JOURNAL OF THERMAL BIOLOGY	41		77	https://ac.els-cdn.com/S0306456514000230/1-s2.0-S0306456514000230-main.pdf?_tid=29a457a6-cf99-11e7-9346-00000aacb360&acdnat=1511364419_fe1579fe7058a25100bea05e143760bf	not biological
698	Vernon et al	2014	NATURAL AREAS JOURNAL	34	2	134	saved	not thermography
699	Bonmarin & Le Gal	2014	COMPUTERS IN BIOLOGY AND MEDICINE	47		36	https://ac.els-cdn.com/S0010482514000195/1-s2.0-S0010482514000195-main.pdf?_tid=9ba63072-cf99-11e7-b41e-00000aacb35f&acdnat=1511364611_4e66efab23295e3402a35b6c8e4f2ed9	not biological
702	Karamanlidis	2014	MAMMALIA	78	2	239	https://www.degruyter.com/view/j/mamm.2014.78.issue-2/mammalia-2013-0096/mammalia-2013-0096.xml	not thermography
703	Hulet et al	2014	RANGELAND ECOLOGY & MANAGEMENT	67	3	318	http://www.bioone.org/doi/pdf/10.2111/REM-D-12-00154.1	not thermography
708	Wang et al	2014	PAKISTAN JOURNAL OF ZOOLOGY	46	3	725	https://scholar.google.com/scholar_lookup?issn=0030-9923&issue=3&journal=PAKISTAN%20JOURNAL%20OF%20ZOOLOGY&hl=en&pages=725-731&title=Using%20Infra-Red%20Camera%20Trapping%20Technology%20to%20Monitor%20Mammals%20along%20Karakorum%20Highway%20in%20Khunjerab%20National%20Park%2C%20Pakistan&author=Y%20Wang&publication_year=2014&volume=46	not thermography
709	Liljesthrom et al	2014	WATERBIRDS	37	2	210	http://www.bioone.org/doi/abs/10.1675/063.037.0209	not thermography
710	Saunders et al	2014	BEHAVIOR RESEARCH METHODS	46	2	439	https://www.ncbi.nlm.nih.gov/pmc/articles/PMC4077667/pdf/nihms592877.pdf	not thermography
711	Taberski et al	2014	RADIATION RESEARCH	181	6	617	https://scholar.google.com/scholar_lookup?author=K%20Taberski&atitle=Noninvasive%20Assessment%20of%20Metabolic%20Effects%20of%20Exposure%20to%20900%20MHz%20Electromagnetic%20Fields%20on%20Djungarian%20Hamsters%20(Phodopus%20sungorus)&publication_year=2014&hl=en&journal=RADIATION%20RESEARCH&volume=181&issue=6&pages=617-622&issn=0033-7587&doi=10.1667/RR13646.1&pmid=24844649	not thermography
712	Fingas & Brown	2014	MARINE POLLUTION BULLETIN	83	1	9	https://ac.els-cdn.com/S0025326X14002021/1-s2.0-S0025326X14002021-main.pdf?_tid=9f84aed8-cfa0-11e7-a523-00000aab0f27&acdnat=1511367632_a55116fde2cfff590fe6b05ff98159b7	not biological
714	van der Wal	2014	JOURNAL OF SEA RESEARCH	90		111	https://ac.els-cdn.com/S1385110114000707/1-s2.0-S1385110114000707-main.pdf?_tid=12c21dee-cfa2-11e7-bbd8-00000aacb35e&acdnat=1511368246_d19ad322a97f66b07b6330905c3034a0	not thermography
715	Gerencser et al	2014	LIVESTOCK SCIENCE	165		114	https://ac.els-cdn.com/S1871141314002236/1-s2.0-S1871141314002236-main.pdf?_tid=327e6bba-cfa2-11e7-924a-00000aacb35d&acdnat=1511368308_b86bc6480373afd90e0c49c12556134f	not thermography
718	Aoyagi et al	2014	WOOD SCIENCE AND TECHNOLOGY	48	4	773	https://link.springer.com/content/pdf/10.1007%2Fs00226-014-0639-y.pdf	not biological
719	Vogt et al	2014	BEHAVIOURAL PROCESSES	106		98	https://ac.els-cdn.com/S0376635714001193/1-s2.0-S0376635714001193-main.pdf?_tid=bbed632c-cfa4-11e7-923d-00000aacb35e&acdnat=1511369389_079459a3f783728ac2b7be7cd8aabedc	not thermograpy
720	McCorkell et al	2014	CANADIAN VETERINARY JOURNAL-REVUE VETERINAIRE CANADIENNE	55	7	688	https://www.ncbi.nlm.nih.gov/pmc/articles/PMC4060915/pdf/cvj_07_688.pdf	not thermograpy
722	Meek et al	2014	BIODIVERSITY AND CONSERVATION	23	9	2321	https://link.springer.com/article/10.1007/s10531-014-0712-8	not thermograpy
723	Lule et al	2014	BIOSYSTEMS ENGINEERING	124		53	https://ac.els-cdn.com/S1537511014000816/1-s2.0-S1537511014000816-main.pdf?_tid=693fd766-cfa6-11e7-9ef2-00000aab0f26&acdnat=1511370118_be3b196601b6f8d6aeaf19439a41aa64	not biological
725	Schmidt et al	2014	ARCHIV FUR TIERZUCHT-ARCHIVES OF ANIMAL BREEDING	57		21	http://doi.fbn-dummerstorf.de/2014/at57a021.pdf	not thermography
726	Nagahara et al	2014	BIOLOGY OPEN	3	8	689	http://bio.biologists.org/content/biolopen/3/8/689.full.pdf	not thermograpy
727	Mills et al	2014	JOURNAL OF BIOMECHANICS	47	11	2606	https://ac.els-cdn.com/S0021929014003340/1-s2.0-S0021929014003340-main.pdf?_tid=3e9ea33c-d034-11e7-844b-00000aab0f01&acdnat=1511431027_658ad325c9741e34d626251912d31721	not thermograpy
729	Bagheri et al	2014	JOURNAL OF BIOMECHANICAL ENGINEERING-TRANSACTIONS OF THE ASME	136	9	91002	http://biomechanical.asmedigitalcollection.asme.org/article.aspx?articleid=1873141	not thermograpy
730	Giordani et al	2014	JOURNAL OF INSECT BEHAVIOR	27	5	652	https://link.springer.com/article/10.1007/s10905-014-9457-1	not thermograpy
733	Petach et al	2014	AGRICULTURAL AND FOREST METEOROLOGY	195		143	https://ac.els-cdn.com/S0168192314001257/1-s2.0-S0168192314001257-main.pdf?_tid=b63ff0d4-d03a-11e7-97d5-00000aacb35e&acdnat=1511433804_63af77253f2bf3cb6c5957edf3e0ae5d	not thermograpy
740	Hester et al	2014	POULTRY SCIENCE	93	10	2423	https://academic.oup.com/ps/article/93/10/2423/1532734	not thermograpy
748	Manickavasagan et al	2014	EMIRATES JOURNAL OF FOOD AND AGRICULTURE	26	11	970	http://www.ejfa.me/index.php/journal/article/view/587/433	not thermograpy
749	Kongsro	2014	COMPUTERS AND ELECTRONICS IN AGRICULTURE	109		32	https://ac.els-cdn.com/S0168169914002075/1-s2.0-S0168169914002075-main.pdf?_tid=44a6e2c4-d077-11e7-a523-00000aab0f27&acdnat=1511459813_69b3e8e6d8fb108e528a5715e497991e	not thermograpy
752	Diamond & Diamond	2014	WESTERN NORTH AMERICAN NATURALIST	74	4	416	saved	not thermography
753	Ballesteros et al	2014	PRECISION AGRICULTURE	15	6	579	https://link.springer.com/content/pdf/10.1007%2Fs11119-014-9355-8.pdf	not thermography
757	Flatters et al	2014	BEHAVIOR RESEARCH METHODS	46	4	950	https://link.springer.com/content/pdf/10.3758%2Fs13428-013-0419-x.pdf	not thermography
760	O'Mahony	2014	VETERINARY JOURNAL	202	3	628	https://ac.els-cdn.com/S1090023314004298/1-s2.0-S1090023314004298-main.pdf?_tid=fcd7115e-d101-11e7-9f7b-00000aab0f02&acdnat=1511519401_400a32e38133e6d5ca938abc5d8f1375	not thermography
761	Aalhus et al	2014	CANADIAN JOURNAL OF ANIMAL SCIENCE	94	4	545	http://www.bioone.org/doi/pdf/10.1139/CJAS-2014-038	not thermography
762	Stratman & Apker	2014	SOUTHWESTERN NATURALIST	59	4	500	http://www.bioone.org/doi/pdf/10.1894/TAL-67.1	not obtained
768	von Bueren et al	2015	BIOGEOSCIENCES	12	1	163	https://www.biogeosciences.net/12/163/2015/bg-12-163-2015.pdf	not thermography
769	Batnes et al	2015	POLAR BIOLOGY	38	1	51	https://link.springer.com/article/10.1007/s00300-013-1415-4	not thermography
772	Jannoura et al	2015	BIOSYSTEMS ENGINEERING	129		341	https://ac.els-cdn.com/S1537511014001998/1-s2.0-S1537511014001998-main.pdf?_tid=8c138144-d10d-11e7-b759-00000aacb35e&acdnat=1511524365_cd9c384736a170e1daee44eb37e256ec	not thermography
773	Liu et al	2015	JOURNAL OF STORED PRODUCTS RESEARCH	60		67	https://ac.els-cdn.com/S0022474X14000940/1-s2.0-S0022474X14000940-main.pdf?_tid=b6f25bec-d10d-11e7-bb69-00000aacb362&acdnat=1511524438_86c10b4f8a72089ed9c34bf42a4f4898	not thermography
775	Beavon & Kelly	2015	NEW ZEALAND JOURNAL OF ECOLOGY	39	1	43	http://newzealandecology.org/nzje/3213.pdf	not thermography
777	Meek et al	2015	AUSTRALIAN MAMMALOGY	37	1	1	http://www.publish.csiro.au/AM/AM14021	not thermography
778	Meek et al	2015	AUSTRALIAN MAMMALOGY	37	1	13	http://www.publish.csiro.au/AM/AM14023	not thermography
779	Mengod et al	2015	INTERNATIONAL JOURNAL OF WILDLAND FIRE	24	2	261	http://www.publish.csiro.au/wf/wf13200	not obtained
780	Okayama et al	2015	International Conference on Agro-Industry (IcoA): Sustainable and Competitive Agro-Industry for Human Welfare Yogyakarta-INDONESIA 2014	3		40	https://ac.els-cdn.com/S221078431500011X/1-s2.0-S221078431500011X-main.pdf?_tid=5824fd6e-d111-11e7-bfef-00000aab0f6b&acdnat=1511525988_985fa9b54c0757625eb00475365a06ba	not thermography
782	Wang et al	2015	DESIGN AND PERFORMANCE VALIDATION OF PHANTOMS USED IN CONJUNCTION WITH OPTICAL MEASUREMENT OF TISSUE VII	9325		932508	https://www.spiedigitallibrary.org/conference-proceedings-of-spie/9325/1/3D-printed-biomimetic-vascular-phantoms-for-assessment-of-hyperspectral-imaging/10.1117/12.2084720.short?SSO=1	not thermography
783	Samson et al	2015	FOLIA PRIMATOLOGICA	86	3	187	https://scholar.google.com/scholar_lookup?author=D%20Samson&atitle=Pre-Sleep%20and%20Sleeping%20Platform%20Construction%20Behavior%20in%20Captive%20Orangutans%20(Pongo%20spp.):%20Implications%20for%20Ape%20Health%20and%20Welfare&publication_year=2015&hl=en&journal=FOLIA%20PRIMATOLOGICA&volume=86&issue=3&pages=187-202&issn=0015-5713&doi=10.1159/000381056&pmid=25998256	not thermography
784	Pauling	2015	JOURNAL OF VASCULAR RESEARCH	52		62	n/a	isolated abstract
785	Dalmau et al	2015	ANIMAL PRODUCTION SCIENCE	55	9	1207	saved	not thermography
788	Jerbi et al	2015	FUNCTIONAL PLANT BIOLOGY	42	9	858	http://www.publish.csiro.au/fp/fp15024	not obtained
789	McGregor et al	2015	WILDLIFE RESEARCH	42	3	223	http://www.publish.csiro.au/wr/pdf/WR14180	not thermography
790	Francis et al	2015	WILDLIFE RESEARCH	42	4	324	http://www.publish.csiro.au/wr/pdf/WR14182	not thermography
791	McLean et al	2015	AUSTRALIAN MAMMALOGY	37	1	113	https://scholar.google.com/scholar_lookup?author=C%20McLean&atitle=Use%20of%20motion-activated%20remote%20cameras%20to%20detect%20the%20endangered%20spotted-tailed%20quoll%20(Dasyurus%20maculatus):%20results%20from%20a%20pilot%20study&publication_year=2015&hl=en&journal=AUSTRALIAN%20MAMMALOGY&volume=37&issue=1&pages=113-115&issn=0310-0049&doi=10.1071/AM14034	not thermography
792	Robbins & Lehmann	2015	FOLIA PRIMATOLOGICA	86	4	348	https://www.karger.com/Article/Pdf/435825	isolated abstract
793	Torricelli et al	2015	FRUTIC ITALY 2015: 9TH NUT AND VEGETABLE PRODUCTION ENGINEERING SYMPOSIUM	44		43	https://re.public.polimi.it/retrieve/handle/11311/971959/101503/60torricelli_revised_CET.pdf	not thermography
795	Svejdova et al	2015	MENDELNET 2015			164	n/a	not obtained
796	Virlet et al	2015	II INTERNATIONAL SYMPOSIUM ON HORTICULTURE IN EUROPE	1099		879	http://www.actahort.org/members/showpdf?booknrarnr=1099_112	not obtained
797	Goerlach et al	2015	PROCEEDINGS OF THE ASME INTERNATIONAL MECHANICAL ENGINEERING CONGRESS AND EXPOSITION, 2014, VOL 3			V003T03A019	https://scholar.google.co.uk/scholar?hl=en&as_sdt=0%2C5&q=ACCURACY+OF+SURFACE+POINT+DETECTION+WITH+AN+850NM+LASER+AND+NDI+STEREO+CAMERA&btnG=	not thermography
798	Bienefeld et al	2015	JOURNAL OF APICULTURAL RESEARCH	54	5	541	http://www.tandfonline.com/doi/pdf/10.1080/00218839.2016.1174465?needAccess=true	not thermography
799	Khamis et al	2015	AGRICULTURE AND CLIMATE CHANGE - ADAPTING CROPS TO INCREASED UNCERTAINTY (AGRI 2015)	29		49	https://ac.els-cdn.com/S187802961500362X/1-s2.0-S187802961500362X-main.pdf?_tid=e778955a-d118-11e7-8df0-00000aacb35f&acdnat=1511529235_e08036608094da48c8450ee2cfce860c	isolated abstract
800	Albaladejo et al	2015	AGRICULTURE AND CLIMATE CHANGE - ADAPTING CROPS TO INCREASED UNCERTAINTY (AGRI 2015)	29		91	https://ac.els-cdn.com/S1878029615003874/1-s2.0-S1878029615003874-main.pdf?_tid=28057aca-d119-11e7-bb5f-00000aacb35d&acdnat=1511529343_3131735a8ea1e25f38e2aac514e453f3	isolated abstract
801	Kyratzis et al	2015	AGRICULTURE AND CLIMATE CHANGE - ADAPTING CROPS TO INCREASED UNCERTAINTY (AGRI 2015)	29		225	http://www.sciencedirect.com/science/article/pii/S1878029615005617	not thermography
803	Martinez et al	2015	WORLD CONGRESS ON MEDICAL PHYSICS AND BIOMEDICAL ENGINEERING, 2015, VOLS 1 AND 2	51		897	https://scholar.google.co.uk/scholar?hl=en&as_sdt=0%2C5&q=Orthogonal+IR+System+for+Instrumental+tracking+in+Minimally+Invasive+Spine+Procedures+for+training+using+Wiimote+Technology&btnG=	not thermography
808	Lau et al	2015	AMERICAN JOURNAL OF PHYSIOLOGY-ENDOCRINOLOGY AND METABOLISM	308	2	E159	n/a	not obtained
810	Farana et al	2015	HUMAN MOVEMENT SCIENCE	39		88	https://ac.els-cdn.com/S0167945714001882/1-s2.0-S0167945714001882-main.pdf?_tid=446e58c8-d126-11e7-b398-00000aacb35f&acdnat=1511534975_4f9959f110a8288d8eae8c8b03130ed7	not thermography
811	Soria-Diaz & Monroy-Vilchis	2015	MAMMALIA	79	1	43	https://www.degruyter.com/downloadpdf/j/mamm.2015.79.issue-1/mammalia-2013-0107/mammalia-2013-0107.pdf	not thermography
813	Sun et al	2015	PHYSIOLOGY & BEHAVIOR	139		336	https://ac.els-cdn.com/S0031938414005691/1-s2.0-S0031938414005691-main.pdf?_tid=b2d6eafe-d127-11e7-9299-00000aab0f26&acdnat=1511535589_c60f4a67d2d03d65be0aa5c367579440	not thermography
817	Mauranen et al	2015	WOOD SCIENCE AND TECHNOLOGY	49	2	359	https://link.springer.com/content/pdf/10.1007%2Fs00226-015-0705-0.pdf	not biological
823	Lehmann et al	2015	FORESTS	6	3	594	http://www.mdpi.com/1999-4907/6/3/594/htm	not thermography
826	Montanholi	2015	VETERINARY RECORD	176	12	306	https://scholar.google.com/scholar_lookup?author=Y%20Montanholi&atitle=Using%20infrared%20radiation%20to%20detect%20local%20inflammation%20in%20cattle&publication_year=2015&hl=en&journal=VETERINARY%20RECORD&volume=176&issue=12&pages=306-307&issn=0042-4900&doi=10.1136/vr.h1404&pmid=25792679	isolated abstract
827	Wood et al	2015	VETERINARY RECORD	176	12		https://www.researchgate.net/profile/Yi_Chun_Lin3/publication/269173134_Infrared_thermometry_for_lesion_monitoring_in_cattle_lameness/links/5657ae1208ae1ef9297bf220.pdf	not thermography
829	Zhang et al	2015	ANIMAL BEHAVIOUR	106		119	https://ac.els-cdn.com/S0003347214004813/1-s2.0-S0003347214004813-main.pdf?_tid=04dbed10-d38d-11e7-96a9-00000aacb35d&acdnat=1511799008_2a172e3d97ca7d1cf69fc47e69167eee	not thermography
833	San Martin et al	2015	LABORATORY ANIMALS	49	2	168	https://pdfs.semanticscholar.org/1b72/e964741e0052df067e424c938e9b4c0c4dc4.pdf#page=98	not thermography
834	Wouters et al	2015	COMPUTERS AND ELECTRONICS IN AGRICULTURE	113		93	https://ac.els-cdn.com/S0168169915000411/1-s2.0-S0168169915000411-main.pdf?_tid=b79cd5bc-d38e-11e7-ad2f-00000aab0f6b&acdnat=1511799738_0ce3dd6ecd6dabfbc2a747dbc9753d30	not thermography
837	Tamski & serrat	2015	FASEB JOURNAL	29	1	869.2	http://www.fasebj.org/content/29/1_Supplement/869.2.short	isolated abstract
842	Sung et al	2015	JOURNAL OF WILDLIFE MANAGEMENT	79	4	537	http://onlinelibrary.wiley.com/doi/10.1002/jwmg.861/epdf	not thermography
844	Ohmer et al	2015	FUNCTIONAL ECOLOGY	29	5	674	http://onlinelibrary.wiley.com/doi/10.1111/1365-2435.12370/epdf	not thermography
845	Rozado et al	2015	INTERNATIONAL JOURNAL OF HUMAN-COMPUTER STUDIES	78		31	https://ac.els-cdn.com/S1071581915000294/1-s2.0-S1071581915000294-main.pdf?_tid=c7bf4434-d393-11e7-a764-00000aab0f01&acdnat=1511801915_05bd398c20a0b0e63d048c05cbeb3812	not thermography
846	Garvey et al	2015	BIOLOGICAL INVASIONS	17	6	1771	https://link.springer.com/content/pdf/10.1007%2Fs10530-014-0833-8.pdf	not thermography
851	Vaever et al	2015	BEHAVIOR RESEARCH METHODS	47	2	328	https://link.springer.com/article/10.3758/s13428-014-0487-6	not thermography
852	Mehdizadeh et al	2015	COMPUTERS AND ELECTRONICS IN AGRICULTURE	114		88	https://ac.els-cdn.com/S0168169915001039/1-s2.0-S0168169915001039-main.pdf?_tid=c2d4ed7c-d396-11e7-9b21-00000aab0f6b&acdnat=1511803192_c3521aa1da839139736338585b7ebb59	not thermography
853	Goggin et al	2015	CURRENT OPINION IN INSECT SCIENCE	9		69	https://ac.els-cdn.com/S2214574515000334/1-s2.0-S2214574515000334-main.pdf?_tid=0213d714-d397-11e7-9fe8-00000aacb360&acdnat=1511803299_e63e432bc7853f5d87102540a0875d3e	not thermography
855	Imukova et al	2015	AGRICULTURAL AND FOREST METEOROLOGY	206		113	https://ac.els-cdn.com/S0168192315000817/1-s2.0-S0168192315000817-main.pdf?_tid=34dbf27a-d398-11e7-9518-00000aacb35f&acdnat=1511803813_85d3ace8318545f614f97e6836a04247	not thermography
856	Moller et al	2015	JOURNAL OF APPLIED PHYSIOLOGY	118	12	1525	https://scholar.google.com/scholar_lookup?author=W%20Moeller&atitle=Nasal%20high%20flow%20clears%20anatomical%20dead%20space%20in%20upper%20airway%20models&publication_year=2015&hl=en&journal=JOURNAL%20OF%20APPLIED%20PHYSIOLOGY&volume=118&issue=12&pages=1525-1532&issn=8750-7587&doi=10.1152/japplphysiol.00934.2014&pmid=25882385	not thermography
859	Farinato et al	2015	INTERNATIONAL JOURNAL OF ASTROBIOLOGY	14	3	365	https://www.cambridge.org/core/services/aop-cambridge-core/content/view/9532243EB25372ACF0156DD54F715568/S1473550414000494a.pdf/the-nir-arm-of-shark-system-for-coronagraphy-with-high-order-adaptive-optics-from-r-to-k-bands.pdf	not thermography
860	Munoz	2015	INTERNATIONAL JOURNAL OF ASTROBIOLOGY	14	3	379	https://www.cambridge.org/core/services/aop-cambridge-core/content/view/51A36A883CBE048EC7BF6D85FD46BA49/S1473550414000573a.pdf/towards_a_comprehensive_model_of_earths_diskintegrated_stokes_vector.pdf	not thermography
863	Hedges et al	2015	JOURNAL OF WILDLIFE MANAGEMENT	79	5	846	http://onlinelibrary.wiley.com/doi/10.1002/jwmg.901/epdf	not thermography
864	Wang et al	2015	JOURNAL OF BIOPHOTONICS	8	7	527	https://onlinelibrary.wiley.com/doi/full/10.1002/jbio.201400026	not thermography
865	Stavrakakis et al	2015	VETERINARY JOURNAL	205	1	38	https://ac.els-cdn.com/S1090023315001641/1-s2.0-S1090023315001641-main.pdf?_tid=5b0ba526-d39d-11e7-a793-00000aacb362&acdnat=1511806025_9fa23764cc5d7ef1e2ecaf83ec331b7d	not thermography
869	Jones et al	2015	HUMAN MOVEMENT SCIENCE	42		203	https://ac.els-cdn.com/S0167945715000871/1-s2.0-S0167945715000871-main.pdf?_tid=36f7da02-d3a1-11e7-9999-00000aab0f02&acdnat=1511807682_20b2232373266e3f8e068dbe10b3ae0b	not thermography
872	Heussner et al	2015	JOURNAL OF THERMAL BIOLOGY	52		38	https://ac.els-cdn.com/S0306456515300127/1-s2.0-S0306456515300127-main.pdf?_tid=779f23ac-d3a2-11e7-9b21-00000aab0f6b&acdnat=1511808220_3b6646b397fa54788022ddebd96d1bc4	not biological
874	Chen et al	2015	INTERNATIONAL JOURNAL OF PRIMATOLOGY	36	4	679	https://link.springer.com/content/pdf/10.1007%2Fs10764-015-9848-y.pdf	not thermography
876	Antikainen et al	2015	EUROPEAN JOURNAL OF WOOD AND WOOD PRODUCTS	73	5	617	https://link.springer.com/content/pdf/10.1007%2Fs00107-015-0944-7.pdf	not biological
880	Welbourne et al	2015	WILDLIFE RESEARCH	42	5	414	https://scholar.google.com/scholar_lookup?author=D%20Welbourne&atitle=The%20effectiveness%20and%20cost%20of%20camera%20traps%20for%20surveying%20small%20reptiles%20and%20critical%20weight%20range%20mammals:%20a%20comparison%20with%20labour-intensive%20complementary%20methods&publication_year=2015&hl=en&journal=WILDLIFE%20RESEARCH&volume=42&issue=5&pages=414-425&issn=1035-3712&doi=10.1071/WR15054	not thermography
881	Sharma et al	2015	CROP SCIENCE	55	5	2251	https://dl.sciencesocieties.org/publications/cs/abstracts/55/5/2252	not thermography
882	Christensen et al	2015	NEW ZEALAND JOURNAL OF FORESTRY SCIENCE	45		16	https://link.springer.com/content/pdf/10.1186%2Fs40490-015-0044-9.pdf	not thermography
883	Pirie & Alario	2015	AMERICAN JOURNAL OF VETERINARY RESEARCH	76	10	897	https://avmajournals.avma.org/doi/pdf/10.2460/ajvr.76.10.897	not thermography
885	Chambers & Bencini	2015	ANIMAL CONSERVATION	18	5	424	http://onlinelibrary.wiley.com/doi/10.1111/acv.12189/epdf	not thermography
886	Ellis et al	2015	APPLIED ANIMAL BEHAVIOUR SCIENCE	171		108	https://ac.els-cdn.com/S0168159115002154/1-s2.0-S0168159115002154-main.pdf?_tid=78c5e856-d429-11e7-bd5b-00000aacb35e&acdnat=1511866204_60d433ff7925cbec2b7053ebefd48a97	not thermography
889	Zhang et al	2015	BIOSYSTEMS ENGINEERING	139		25	https://ac.els-cdn.com/S1537511015001269/1-s2.0-S1537511015001269-main.pdf?_tid=300f2620-d42b-11e7-afd2-00000aab0f26&acdnat=1511866941_323b6954cd3c18ec8d2a30326ba333bd	not thermography
893	Dunthorn et al	2015	JOURNAL OF DAIRY RESEARCH	82	4	391	https://www.cambridge.org/core/services/aop-cambridge-core/content/view/89A3DA91A65EA53A9E5EF4F66C867769/S002202991500028Xa.pdf/div-class-title-predictive-models-of-lameness-in-dairy-cows-achieve-high-sensitivity-and-specificity-with-force-measurements-in-three-dimensions-div.pdf	not thermography
894	Pautsina et al	2015	AQUACULTURAL ENGINEERING	69		7	https://ac.els-cdn.com/S0144860915300066/1-s2.0-S0144860915300066-main.pdf?_tid=71b9aa3a-d42d-11e7-8bdf-00000aacb362&acdnat=1511867910_b659852275ba105ab6729e6ee56d83cd	not thermography
897	Kolic et al	2015	SEEFOR-SOUTH-EAST EUROPEAN FORESTRY	6	2	191	http://hrcak.srce.hr/index.php?show=clanak&id_clanak_jezik=220048	not thermography
903	Chen et al	2015	ERGONOMICS	58	12	2057	http://www.tandfonline.com/doi/pdf/10.1080/00140139.2015.1051594?needAccess=true	not thermography
904	Rohani & Puthusserypady	2015	EPJ NONLINEAR BIOMEDICAL PHYSICS	3		12	https://epjnonlinearbiomedphys.springeropen.com/track/pdf/10.1140/epjnbp/s40366-015-0027-z?site=epjnonlinearbiomedphys.springeropen.com	not thermography
905	van der Lans et al	2016	JOURNAL OF PHYSIOLOGICAL SCIENCES	66	1	77	https://link.springer.com/content/pdf/10.1007%2Fs12576-015-0398-z.pdf	not thermography
907	Dizney & Dearing	2016	ANIMAL BEHAVIOUR	111		341	https://ac.els-cdn.com/S0003347215004194/1-s2.0-S0003347215004194-main.pdf?_tid=c947fa28-d436-11e7-856f-00000aacb35d&acdnat=1511871923_f0d197c098acae49e7d8b700bface398	not thermography
913	McShea et al	2016	LANDSCAPE ECOLOGY	31	1	55	https://link.springer.com/content/pdf/10.1007%2Fs10980-015-0262-9.pdf	not thermography
914	Legler et al	2016	WIENER TIERARZTLICHE MONATSSCHRIFT	103	1	9	n/a	not obtained
916	Franchi et al	2016	JOURNAL OF VETERINARY BEHAVIOR-CLINICAL APPLICATIONS AND RESEARCH	11		60	https://ac.els-cdn.com/S1558787815001598/1-s2.0-S1558787815001598-main.pdf?_tid=43a5fa38-d444-11e7-8033-00000aab0f01&acdnat=1511877712_995d555d493b07ced8f46ecd463dd365	not thermography
918	Ferrie et al	2016	ZOO BIOLOGY	35	1	76	http://onlinelibrary.wiley.com/doi/10.1002/zoo.21254/epdf	not thermography
920	Claridge et al	2016	AUSTRALIAN MAMMALOGY	38	1	12	http://www.publish.csiro.au/am/AM15015	not thermography
923	Chachelle et al	2016	WILDLIFE RESEARCH	43	1	13	http://www.publish.csiro.au/wr/pdf/WR15124	not thermography
924	Al-Armaghany et al	2016	OXYGEN TRANSPORT TO TISSUE XXXVII	876		435	https://link.springer.com/chapter/10.1007/978-1-4939-3023-4_55	not obtained
929	Aldawood et al	2016	TOWARDS THE SUSTAINABLE USE OF BIODIVERSITY IN A CHANGING ENVIRONMENT: FROM BASIC TO APPLIED RESEARCH	1744		20001	http://aip.scitation.org/doi/pdf/10.1063/1.4953475	not thermography
931	Letnic et al	2016	AUSTRALIAN MAMMALOGY	38	2	241	saved	not thermography
933	Grossi et al	2016	I INTERNATIONAL SYMPOSIUM ON GRAPEVINE ROOTS	1136		229	http://www.actahort.org/members/showpdf?booknrarnr=1136_31	not obtained
935	Kittas et al	2016	XXIX INTERNATIONAL HORTICULTURAL CONGRESS ON HORTICULTURE: SUSTAINING LIVES, LIVELIHOODS AND LANDSCAPES (IHC2014): INTERNATIONAL SYMPOSIA ON WATER, ECO-EFFICIENCY AND TRANSFORMATION OF ORGANIC WASTE IN HORTICULTURAL PRODUCTION	1112		63	http://www.actahort.org/members/showpdf?booknrarnr=1112_9	not thermography
937	Doughty et al	2016	BIOPHOTONICS AND IMMUNE RESPONSES XI	9709		UNSP 97090N	n/a	not obtained
939	Underhill et al	2016	XXIX INTERNATIONAL HORTICULTURAL CONGRESS ON HORTICULTURE: SUSTAINING LIVES, LIVELIHOODS AND LANDSCAPES (IHC2014): INTERNATIONAL SYMPOSIUM ON HORTICULTURE IN DEVELOPING COUNTRIES AND WORLD FOOD PRODUCTION	1128		329	http://research.usc.edu.au/vital/access/manager/Repository/usc:13469	not obtained
943	Mei et al	2016	BIOSENSORS & BIOELECTRONICS	75		427	https://ac.els-cdn.com/S095656631530378X/1-s2.0-S095656631530378X-main.pdf?_tid=0c7633ce-d46d-11e7-8c34-00000aab0f6c&acdnat=1511895228_cca3baa583439c7f2398bb04c6f0ecd9	not thermography
945	Bowman et al	2016	ZOONOSES AND PUBLIC HEALTH	63	1	34	http://onlinelibrary.wiley.com/doi/10.1111/zph.12201/epdf	not thermography
946	Elazab et al	2016	EUROPEAN JOURNAL OF AGRONOMY	73		11	http://www.sciencedirect.com/science/article/pii/S1161030115300575	not thermography
956	Collins et al	2016	JOURNAL OF ANIMAL SCIENCE	94		37	https://academic.oup.com/jas/article/94/suppl_1/37/4700254	isolated abstract
957	Manton et al	2016	FRONTIERS IN PSYCHOLOGY	7		142	https://www.ncbi.nlm.nih.gov/pmc/articles/PMC4749696/pdf/fpsyg-07-00142.pdf	not thermography
958	Chia et al	2016	FOREST ECOLOGY AND MANAGEMENT	363		130	https://ac.els-cdn.com/S0378112715007355/1-s2.0-S0378112715007355-main.pdf?_tid=3c4cdff8-d503-11e7-b1f8-00000aab0f02&acdnat=1511959733_5b1a6bec2ae32bb24950d68368f3527c	not thermography
960	Mauruschat et al	2016	WOOD SCIENCE AND TECHNOLOGY	50	2	313	https://link.springer.com/content/pdf/10.1007%2Fs00226-015-0785-x.pdf	not thermography
961	Rasmussen et al	2016	EUROPEAN JOURNAL OF AGRONOMY	74		75	https://ac.els-cdn.com/S1161030115300733/1-s2.0-S1161030115300733-main.pdf?_tid=5b8928c6-d504-11e7-8ce7-00000aacb360&acdnat=1511960215_0f009f781e1208bc5390afc2a936deb3	not thermography
963	Deeming & Gray	2016	AVIAN BIOLOGY RESEARCH	9	1	28	http://www.ingentaconnect.com/content/stl/abr/2016/00000009/00000001/art00005	not thermography
966	Spano et al	2016	REVISTA BRASILEIRA DE MEDICINA DO ESPORTE	22	2	92	http://www.scielo.br/pdf/rbme/v22n2/1517-8692-rbme-22-02-00092.pdf	not thermography
967	Ariza-Avidad et al	2016	BIOSENSORS & BIOELECTRONICS	77		51	https://ac.els-cdn.com/S0956566315304085/1-s2.0-S0956566315304085-main.pdf?_tid=dbcac618-d507-11e7-bd5b-00000aacb35e&acdnat=1511961727_d044d288c3746cd5002bdc27616a8df0	not thermography
969	Lopez-Granados et al	2016	PRECISION AGRICULTURE	17	2	183	https://link.springer.com/content/pdf/10.1007%2Fs11119-015-9415-8.pdf	not thermography
973	Zarybnicka et al	2016	METHODS IN ECOLOGY AND EVOLUTION	7	4	483	http://onlinelibrary.wiley.com/doi/10.1111/2041-210X.12509/epdf	not thermography
976	Bourgeon et al	2016	COMPUTERS AND ELECTRONICS IN AGRICULTURE	123		184	https://ac.els-cdn.com/S0168169916300564/1-s2.0-S0168169916300564-main.pdf?_tid=02a05bce-d515-11e7-8c6e-00000aacb35d&acdnat=1511967367_951accfd25ab33c166b41182bfdaee23	not thermography
977	Mortensen et al	2016	COMPUTERS AND ELECTRONICS IN AGRICULTURE	123		319	https://ac.els-cdn.com/S016816991630076X/1-s2.0-S016816991630076X-main.pdf?_tid=517c6060-ba50-11e7-a929-00000aab0f6b&acdnat=1509024158_1e2d9c8d6f4d672655253ebf3ac1e29d	not thermography
980	Warnecke et al	2016	FRONTIERS IN BEHAVIORAL NEUROSCIENCE	10		81	https://www.ncbi.nlm.nih.gov/pmc/articles/PMC4843091/pdf/fnbeh-10-00081.pdf	not thermography
984	Voss et al	2016	TIERAERZTLICHE UMSCHAU	71	5	157	saved	not thermography
986	Machado et al	2016	JOURNAL OF DAIRY SCIENCE	99	6	4899	https://ac.els-cdn.com/S0022030216300947/1-s2.0-S0022030216300947-main.pdf?_tid=103d9ee8-d51c-11e7-bb75-00000aab0f6b&acdnat=1511970397_12bfe586d63621f4b1b7303cdb96cf0a	not thermography
988	Bayne et al	2016	AMERICAN JOURNAL OF VETERINARY RESEARCH	77	6	589	https://avmajournals.avma.org/doi/pdf/10.2460/ajvr.77.6.589	not thermography
990	Vermette et al	2016	POULTRY SCIENCE	95	6	1223	https://academic.oup.com/ps/article/95/6/1223/2223858	not thermography
994	Martinig & Belanger-Smith	2016	JOURNAL OF APPLIED ECOLOGY	53	3	825	http://onlinelibrary.wiley.com/doi/10.1111/1365-2664.12616/epdf	not thermography
996	Sunaga et al	2016	APPLIED ERGONOMICS	55		173	https://ac.els-cdn.com/S000368701630028X/1-s2.0-S000368701630028X-main.pdf?_tid=11ef2942-d520-11e7-bb75-00000aab0f6b&acdnat=1511972117_ad6584575bf3fb848c0d4e20996a7a92	not thermography
997	Powell & Vitale	2016	ZOO BIOLOGY	35	4	298	http://onlinelibrary.wiley.com/doi/10.1002/zoo.21289/epdf	not thermography
998	Rodriguez-Moreno et al	2016	COMPUTERS AND ELECTRONICS IN AGRICULTURE	125		81	https://ac.els-cdn.com/S0168169916301946/1-s2.0-S0168169916301946-main.pdf?_tid=6f6a9c14-d520-11e7-bf4d-00000aab0f27&acdnat=1511972274_baf3c2ae679f0d79ed116658eb606e93	not thermography
1003	Venjakob et al	2016	JOURNAL OF DAIRY SCIENCE	99	8	6542	https://ac.els-cdn.com/S0022030216302557/1-s2.0-S0022030216302557-main.pdf?_tid=ced8c82a-d5c9-11e7-bf9a-00000aacb361&acdnat=1512045020_be725cdb765e87c7cf7e4917eb8a2740	not thermography
1005	Toaff-Rosenstein et al	2016	APPLIED ANIMAL BEHAVIOUR SCIENCE	181		49	https://ac.els-cdn.com/S0168159116301435/1-s2.0-S0168159116301435-main.pdf?_tid=1018a962-d5cb-11e7-835e-00000aacb362&acdnat=1512045559_71e9aff506c09459f49848b92c9b7fd5	not thermography
1012	Handcock et al	2016	BIOGEOSCIENCES	13	16	4673	http://researchrepository.murdoch.edu.au/id/eprint/33132/1/tropical%20pastures.pdf	not thermography
1015	Spoliansky et al	2016	JOURNAL OF DAIRY SCIENCE	99	9	7714	https://ac.els-cdn.com/S0022030216303630/1-s2.0-S0022030216303630-main.pdf?_tid=90bfa9c4-d5d2-11e7-ac05-00000aab0f6b&acdnat=1512048781_45ee3c49918d0213812a3db7bc7dc67b	not thermography
1022	Jara et al	2016	JOURNAL OF THE AMERICAN ASSOCIATION FOR LABORATORY ANIMAL SCIENCE	55	5	588	http://www.ingentaconnect.com/contentone/aalas/jaalas/2016/00000055/00000005/art00013?crawler=true&mimetype=application/pdf	not thermography
1025	Corcoran & Conner	2016	JOURNAL OF EXPERIMENTAL BIOLOGY	219	17	2704	http://jeb.biologists.org/content/jexbio/219/17/2704.full.pdf	not thermography
1027	Bomphrey et al	2016	PHILOSOPHICAL TRANSACTIONS OF THE ROYAL SOCIETY B-BIOLOGICAL SCIENCES	371	1704	20150389	http://rstb.royalsocietypublishing.org/content/royptb/371/1704/20150389.full.pdf	not thermography
1028	Rabatel & Labbe	2016	PRECISION AGRICULTURE	17	5	564	https://link.springer.com/content/pdf/10.1007%2Fs11119-016-9437-x.pdf	not thermography
1031	Bai et al	2016	COMPUTERS AND ELECTRONICS IN AGRICULTURE	128		181	https://ac.els-cdn.com/S0168169916302289/1-s2.0-S0168169916302289-main.pdf?_tid=0ed8d664-d5ec-11e7-be66-00000aab0f27&acdnat=1512059729_8b2ee047550b5bd137a624ef48ff36a0	not thermography
1035	Jones et al	2016	JOURNAL OF ELECTROMYOGRAPHY AND KINESIOLOGY	30		46	https://ac.els-cdn.com/S1050641116300463/1-s2.0-S1050641116300463-main.pdf?_tid=a1641618-d5ee-11e7-8185-00000aab0f01&acdnat=1512060834_f58b410ce53a878b61cab5fb666dc855	not thermography
1040	Fu et al	2016	AVIAN RESEARCH	7		UNSP 18	https://link.springer.com/content/pdf/10.1186%2Fs40657-016-0054-1.pdf	not thermography
1045	Holmer et al	2016	PHYSIOLOGICAL MEASUREMENT	37	11	UNSP 2064	http://iopscience.iop.org/article/10.1088/0967-3334/37/11/2064/pdf	not thermography
1046	Proctor & Carder	2016	APPLIED ANIMAL BEHAVIOUR SCIENCE	184		1	https://ac.els-cdn.com/S0168159116302180/1-s2.0-S0168159116302180-main.pdf?_tid=3fedd94c-d68d-11e7-a4d0-00000aab0f02&acdnat=1512128961_95eadbb3854725d26007607bd1a40d41	not thermography
1049	Pinsolle et al	2016	BIOMICROFLUIDICS	10		6	http://aip.scitation.org/doi/pdf/10.1063/1.4966619	not thermography
1051	Debnath et al	2016	SMALL RUMINANT RESEARCH	144		135	https://ac.els-cdn.com/S0921448816302425/1-s2.0-S0921448816302425-main.pdf?_tid=8c992d2e-d691-11e7-a6e2-00000aab0f26&acdnat=1512130807_02f9ca8041ff208eb3f384644947db9d	not thermography
1052	Schneider & Basler	2016	PHILOSOPHICAL TRANSACTIONS OF THE ROYAL SOCIETY B-BIOLOGICAL SCIENCES	371	1707	20150499	http://rstb.royalsocietypublishing.org/content/royptb/371/1707/20150499.full.pdf	not thermography
1057	Lopez-Granados et al	2016	AGRONOMY FOR SUSTAINABLE DEVELOPMENT	36	4	67	https://link.springer.com/content/pdf/10.1007%2Fs13593-016-0405-7.pdf	not thermography
1065	Martinez et al	2016	INTERNATIONAL JOURNAL OF BIOMETEOROLOGY	60	12	1969	https://link.springer.com/content/pdf/10.1007%2Fs00484-016-1184-1.pdf	not thermography
1068	Prinz et al	2016	JOURNAL OF FIELD ORNITHOLOGY	87	4	427	http://onlinelibrary.wiley.com/doi/10.1111/jofo.12182/epdf	not thermography
1069	Treilibs et al	2016	JOURNAL OF ZOOLOGY	300	4	281	http://onlinelibrary.wiley.com/doi/10.1111/jzo.12381/epdf	not thermography
1075	Gustas et al	2016	ACTA VETERINARIA SCANDINAVICA	58		87	https://actavetscand.biomedcentral.com/track/pdf/10.1186/s13028-016-0265-9?site=actavetscand.biomedcentral.com	not thermography
1078	Acosta-Gamboa et al	2017	FUNCTIONAL PLANT BIOLOGY	44	1	94	http://www.publish.csiro.au/fp/pdf/FP16172	not thermography
1081	Laguardia et al	2017	ORYX	51	1	153	https://www.cambridge.org/core/services/aop-cambridge-core/content/view/AB61CCE75697F281F38A7E50A814E256/S0030605315000988a.pdf/div-class-title-the-current-distribution-and-status-of-leopards-span-class-italic-panthera-pardus-span-in-china-div.pdf	not thermography
1084	Austin et al	2017	AUSTRALIAN MAMMALOGY	39	1	72	http://www.publish.csiro.au/am/am15053	not thermography
1085	Goldingay & Taylor	2017	AUSTRALIAN MAMMALOGY	39	1	100	http://www.friendsofthekoala.org/here/wp-content/uploads/Goldingay-Taylor-koala-rope-bridge-1.2MB.pdf	not thermography
1086	Balenovic et al	2017	SUMARSKI LIST	141	1	15	http://hrcak.srce.hr/index.php?show=clanak&id_clanak_jezik=259341	not thermography
1088	Caruso et al	2017	VITIS	56	2	63	https://www.researchgate.net/profile/Giovanni_Caruso3/publication/316455058_Estimating_biophysical_and_geometrical_parameters_of_grapevine_canopies_%27Sangiovese%27_by_an_unmanned_aerial_vehicle_UAV_and_VIS-NIR_cameras/links/58ff19db0f7e9bcf6545167c/Estimating-biophysical-and-geometrical-parameters-of-grapevine-canopies-Sangiovese-by-an-unmanned-aerial-vehicle-UAV-and-VIS-NIR-cameras.pdf	not thermography
1089	Underhill et al	2017	JOURNAL OF AGRICULTURAL & FOOD INFORMATION	18	2	75	http://www.tandfonline.com/doi/pdf/10.1080/10496505.2016.1275647?needAccess=true	not thermography
1090	Wu et al	2017	ARCHIVES OF AGRONOMY AND SOIL SCIENCE	63	10	1346	http://www.tandfonline.com/doi/pdf/10.1080/03650340.2017.1280728?needAccess=true	not thermography
1091	Schroder & Sato	2017	WILDLIFE RESEARCH	44	3	259	http://www.bioone.org/doi/pdf/10.1071/WR16102	not thermography
1092	Ostner et al	2017	FOLIA PRIMATOLOGICA	88	2	97	https://www.karger.com/Article/Pdf/479094	isolated abstract
1093	Yadav et al	2017	INDIAN JOURNAL OF DAIRY SCIENCE	70	1	127	https://scholar.google.com/scholar_lookup?author=B%20Yadav&atitle=The%20use%20of%20infrared%20skin%20temperature%20measurements%20for%20monitoring%20heat%20stress%20and%20welfare%20of%20crossbred%20cattle&publication_year=2017&hl=en&journal=INDIAN%20JOURNAL%20OF%20DAIRY%20SCIENCE&volume=70&issue=1&pages=127-131&issn=0019-5146	not thermography
1105	Brown et al	2017	AMERICAN JOURNAL OF HUMAN BIOLOGY	29	2		https://scholar.google.co.uk/scholar?hl=en&as_sdt=0%2C5&q=Relation+between+hot+flash+experience+and+brown+adipose+tissue+measured+by+infrared+thermography+in+a+pilot+study+of+women+at+mid-life&btnG=	isolated abstract
1107	Whetton et al	2017	BIOSYSTEMS ENGINEERING	155		84	https://ac.els-cdn.com/S153751101630215X/1-s2.0-S153751101630215X-main.pdf?_tid=a433b0ee-d9b1-11e7-b8df-00000aacb35e&acdnat=1512474445_37a82519ca7aec78243ec7df62acb227	not thermography
1108	Watanabe et al	2017	FRONTIERS IN PLANT SCIENCE	8		421	https://www.ncbi.nlm.nih.gov/pmc/articles/PMC5368247/pdf/fpls-08-00421.pdf	not thermography
1111	Vanni et al	2017	BEHAVIORAL ECOLOGY AND SOCIOBIOLOGY	71	4	UNSP 61	https://link.springer.com/content/pdf/10.1007%2Fs00265-017-2290-8.pdf	not thermography
1112	Zhou et al	2017	COMPUTERS AND ELECTRONICS IN AGRICULTURE	135		233	https://ac.els-cdn.com/S0168169916311930/1-s2.0-S0168169916311930-main.pdf?_tid=5ca70998-d9b5-11e7-8fcf-00000aab0f27&acdnat=1512476043_25700a28d89c8f7c060276aae3a5c09e	not thermography
1119	Jiang et al	2017	GLOBAL ECOLOGY AND CONSERVATION	10		154	https://ac.els-cdn.com/S2351989416301378/1-s2.0-S2351989416301378-main.pdf?_tid=02ffbf2e-d9bb-11e7-a5c1-00000aacb35e&acdnat=1512478469_078844d7e9530d782d2a76efac5c255e	not thermography
1126	Jang et al	2017	JOURNAL OF MECHANICS IN MEDICINE AND BIOLOGY	17	3	1750051	saved	not thermography
1135	Zhang et al	2017	BIOLOGICAL CONSERVATION	209		119	https://ac.els-cdn.com/S0006320716308539/1-s2.0-S0006320716308539-main.pdf?_tid=c6c02730-da7b-11e7-a54f-00000aab0f6c&acdnat=1512561261_aed5859c6395c3986c5f21dfdec6b393	not thermography
1143	Kotani et al	2017	BEHAVIOURAL PHARMACOLOGY	28	4	313	saved	not thermography
1144	Andrews et al	2017	ACTA CHIROPTEROLOGICA	19	1	161	saved	not thermography
1145	O'Brien et al	2017	ANIMAL	11	6	911	https://www.cambridge.org/core/services/aop-cambridge-core/content/view/7DEDEC5C2043BC6F6D0C0BDD399A213B/S1751731116002445a.pdf/genetic_parameters_for_lameness_mastitis_and_dagginess_in_a_multibreed_sheep_population.pdf	not thermography
1149	Gorecka-Bruzda et al	2017	APPLIED ANIMAL BEHAVIOUR SCIENCE	191		31	https://ac.els-cdn.com/S0168159117300448/1-s2.0-S0168159117300448-main.pdf?_tid=a0b537ca-da84-11e7-9142-00000aacb35f&acdnat=1512565071_ade69431ada51d0ce64a4b09e7845b39	not thermography
1150	Yoda et al	2017	JOURNAL OF AVIAN BIOLOGY	48	6	881	http://onlinelibrary.wiley.com/doi/10.1111/jav.01186/epdf	not thermography
1152	Luthman et al	2017	JOURNAL OF BIOPHOTONICS	10	6	840	http://onlinelibrary.wiley.com/doi/10.1002/jbio.201600304/epdf	not thermography
1153	Korablev et al	2017	ASTROBIOLOGY	17	6	542	http://online.liebertpub.com/doi/pdf/10.1089/ast.2016.1543	not thermography
1156	Pantazi et al	2017	COMPUTERS AND ELECTRONICS IN AGRICULTURE	139		224	https://ac.els-cdn.com/S0168169916308973/1-s2.0-S0168169916308973-main.pdf?_tid=21b3dcc4-da8e-11e7-a3cc-00000aab0f27&acdnat=1512569144_337ba557569aa3fdc1694de0255d93d0	not thermography
1158	Rungpichayapichet et al	2017	BIOSYSTEMS ENGINEERING	159		109	https://ac.els-cdn.com/S1537511016300836/1-s2.0-S1537511016300836-main.pdf?_tid=27151678-da8f-11e7-baf1-00000aacb35d&acdnat=1512569583_1ccf65d37c54a3883cf1e629e49fa1d6	not thermography
1162	Boivin et al	2017	NEUROPSYCHOLOGY	31	5	525	http://psycnet.apa.org/record/2017-23177-001	not thermography
1166	Hayashi et al	2017	VETERINARY OPHTHALMOLOGY	20	4	310	http://onlinelibrary.wiley.com/doi/10.1111/vop.12418/epdf	not thermography
1167	Stokes et al	2017	ZOO BIOLOGY	36	4	261	http://onlinelibrary.wiley.com/doi/10.1002/zoo.21360/epdf	not thermography
1170	Zhang et al	2017	AVIAN RESEARCH	8		19	https://avianres.biomedcentral.com/track/pdf/10.1186/s40657-017-0076-3?site=avianres.biomedcentral.com	not thermography
1171	Montesinos-Lopez et al	2017	PLANT METHODS	13		62	https://plantmethods.biomedcentral.com/track/pdf/10.1186/s13007-017-0212-4?site=plantmethods.biomedcentral.com	not thermography
1175	Rodriguez-Moreno et al	2017	PRECISION AGRICULTURE	18	4	615	https://link.springer.com/content/pdf/10.1007%2Fs11119-016-9478-1.pdf	not thermography
1178	Kim et al	2017	INTERNATIONAL JOURNAL OF SPORTS SCIENCE & COACHING	12	4	540	http://journals.sagepub.com/doi/pdf/10.1177/1747954117721268	not thermography
1180	Silva et al	2017	JOURNAL OF ANIMAL SCIENCE	95		72	https://watermark.silverchair.com/72a.pdf?token=AQECAHi208BE49Ooan9kkhW_Ercy7Dm3ZL_9Cf3qfKAc485ysgAAAckwggHFBgkqhkiG9w0BBwagggG2MIIBsgIBADCCAasGCSqGSIb3DQEHATAeBglghkgBZQMEAS4wEQQMgVQ-KZwsQYEAqZOAAgEQgIIBfHJ7dA8Zr23ETgFtVaZND4sm2PZHKXXo4e3UeVxipjFTABIK5l_pQLvU02gZkXPa-Q2dAMdHM2zOQdts1O8Dzx-U25gQ6xgAIzxpleXlxEyiwLT_WM6r66h1JmJmn46D76zzGrBXvKzWNkYH_somk9pKOVmUfpAfQbPKzV7yQkJD89EIu0gKrhNOAIWPxehdv_p…	isolated abstract
1181	Perez	2017	JOURNAL OF ANIMAL SCIENCE	95		120	https://watermark.silverchair.com/72a.pdf?token=AQECAHi208BE49Ooan9kkhW_Ercy7Dm3ZL_9Cf3qfKAc485ysgAAAckwggHFBgkqhkiG9w0BBwagggG2MIIBsgIBADCCAasGCSqGSIb3DQEHATAeBglghkgBZQMEAS4wEQQMgVQ-KZwsQYEAqZOAAgEQgIIBfHJ7dA8Zr23ETgFtVaZND4sm2PZHKXXo4e3UeVxipjFTABIK5l_pQLvU02gZkXPa-Q2dAMdHM2zOQdts1O8Dzx-U25gQ6xgAIzxpleXlxEyiwLT_WM6r66h1JmJmn46D76zzGrBXvKzWNkYH_somk9pKOVmUfpAfQbPKzV7yQkJD89EIu0gKrhNOAIWPxehdv_p…	isolated abstract
1182	Duan et al	2017	FIELD CROPS RESEARCH	210		71	https://ac.els-cdn.com/S0378429017303684/1-s2.0-S0378429017303684-main.pdf?_tid=66819604-db4f-11e7-ad63-00000aacb35e&acdnat=1512652153_6251d830ca0b95d74febb54de89ff431	not thermography
1185	Goldingay & Taylor	2017	ECOLOGICAL RESEARCH	32	5	743	https://link.springer.com/content/pdf/10.1007%2Fs11284-017-1492-x.pdf	not thermography
1188	De Pauw et al	2017	BRAIN AND BEHAVIOR	7	9	e00735	http://onlinelibrary.wiley.com/doi/10.1002/brb3.735/epdf	not thermography
1189	Groenlund et al	2017	LYMPHATIC RESEARCH AND BIOLOGY	15	3	227	saved	not thermography
1190	Rahman et al	2017	JOURNAL OF VETERINARY BEHAVIOR-CLINICAL APPLICATIONS AND RESEARCH	21		7	http://www.journalvetbehavior.com/article/S1558-7878(17)30120-X/pdf	not thermography
1193	Keever et al	2017	MAMMAL RESEARCH	62	4	413	https://link.springer.com/content/pdf/10.1007%2Fs13364-017-0319-z.pdf	not thermography
1194	Hu et al	2017	JOURNAL OF ORNITHOLOGY	158	4	1111	https://link.springer.com/content/pdf/10.1007%2Fs10336-017-1476-1.pdf	not thermography
1205	Lee et al	2017	JOURNAL OF PHYSIOLOGICAL ANTHROPOLOGY	36		37	https://jphysiolanthropol.biomedcentral.com/track/pdf/10.1186/s40101-017-0153-7?site=jphysiolanthropol.biomedcentral.com	not thermography
1206	Colak & Yazar	2017	SCIENTIA HORTICULTURAE	224		384	https://ac.els-cdn.com/S0304423817303710/1-s2.0-S0304423817303710-main.pdf?_tid=3b95b388-db65-11e7-9912-00000aacb361&acdnat=1512661530_59358b3d82e9af013d50b6dff0fa308e	not thermography
1208	Thumm & Riddell	2017	EUROPEAN JOURNAL OF WOOD AND WOOD PRODUCTS	75	6	995	https://link.springer.com/content/pdf/10.1007%2Fs00107-017-1188-5.pdf	not thermography
1209	Aziz et al	2017	ECOLOGY AND EVOLUTION	7	21	8670	http://onlinelibrary.wiley.com/doi/10.1002/ece3.3213/epdf	not thermography
1210	Dobrescu et al	2017	PLANT METHODS	13		95	https://plantmethods.biomedcentral.com/track/pdf/10.1186/s13007-017-0247-6?site=plantmethods.biomedcentral.com	not thermography
1211	Valle et al	2017	PLANT METHODS	13		98	https://plantmethods.biomedcentral.com/track/pdf/10.1186/s13007-017-0248-5?site=plantmethods.biomedcentral.com	not thermography
1212	Gracia-Romero et al	2017	FRONTIERS IN PLANT SCIENCE	8		2004	https://www.frontiersin.org/articles/10.3389/fpls.2017.02004/full	not thermography
1218	Stanwicks et al	2017	APPLIED ANIMAL BEHAVIOUR SCIENCE	197		62	https://ac.els-cdn.com/S0168159117302526/1-s2.0-S0168159117302526-main.pdf?_tid=f53f78e2-db73-11e7-a82f-00000aab0f6c&acdnat=1512667862_cac24eef180ad6677303b384c278646e	not thermography

## Sheet: Reviews
#	Author	Year	Journal	volume	issue	page	URL
25	Chaerle et al	2007	JOURNAL OF EXPERIMENTAL BOTANY	58	4	773	https://academic.oup.com/jxb/article/58/4/773/430442
40	Yanmaz et al	2007	JOURNAL OF ANIMAL AND VETERINARY ADVANCES	6	7	858	https://www.researchgate.net/profile/Latif_Yanmaz/publication/26590566_Instrumentation_of_Thermography_and_its_Applications_in_Horses/links/57c82c3e08aec24de044d7e4/Instrumentation-of-Thermography-and-its-Applications-in-Horses.pdf
44	McCafferty	2007	MAMMAL REVIEW	37	3	207	http://www.fabioluzi.it/wordpress/wp-content/uploads/2012/11/Termografia_Mammals.pdf
75	Aranda et al	2008	MODELLING, MONITORING AND MANAGEMENT OF FOREST FIRES	119		111	https://www.witpress.com/Secure/elibrary/papers/FIVA08/FIVA08012FU1.pdf
102	Kolaric et al	2008	PERIODICUM BIOLOGORUM	110	2	205	http://hrcak.srce.hr/32611
103	Hristov et al	2008	INTEGRATIVE AND COMPARATIVE BIOLOGY	48	1	50	http://www.jstor.org/stable/pdf/25160119.pdf?refreqid=excelsior:b104c5ca07ed5f7ae5a39a8b6aa8cc99
112	Guilioni et al	2008	AGRICULTURAL AND FOREST METEOROLOGY	148	11	1908	https://ac.els-cdn.com/S0168192308002074/1-s2.0-S0168192308002074-main.pdf?_tid=90aab142-b807-11e7-81c6-00000aacb361&acdnat=1508773009_65206384520c98f9a931221916b34e19
116	Wisniewski et al	2008	HORTSCIENCE	43	6	1648	http://hortsci.ashspublications.org/content/43/6/1648.full.pdf+html
136	Furbank	2009	FUNCTIONAL PLANT BIOLOGY	36	10	V	http://www.publish.csiro.au/fp/pdf/fpv36n11_fo
138	Jones et al	2009	FUNCTIONAL PLANT BIOLOGY	36	10	978	https://scholar.google.com/scholar_lookup?author=H%20Jones&atitle=Thermal%20infrared%20imaging%20of%20crop%20canopies%20for%20the%20remote%20diagnosis%20and%20quantification%20of%20plant%20responses%20to%20water%20stress%20in%20the%20field&publication_year=2009&hl=en&journal=FUNCTIONAL%20PLANT%20BIOLOGY&volume=36&issue=10-11&pages=978-989&issn=1445-4408&doi=10.1071/FP09123
142	Wieniewski et al	2009	PLANT COLD HARDINESS: FROM THE LABORATORY TO THE FIELD			1	http://apps.webofknowledge.com/full_record.do?product=WOS&search_mode=Analyze&qid=12&SID=V14H8DwmONKlBOFJt2r&excludeEventConfig=ExcludeIfFromFullRecPage&page=13&doc=142
143	Fuller et al	2009	PLANT COLD HARDINESS: FROM THE LABORATORY TO THE FIELD			12	http://apps.webofknowledge.com/full_record.do?product=WOS&search_mode=Analyze&qid=12&SID=V14H8DwmONKlBOFJt2r&excludeEventConfig=ExcludeIfFromFullRecPage&page=13&doc=143
144	Gusta et al	2009	PLANT COLD HARDINESS: FROM THE LABORATORY TO THE FIELD			214	http://apps.webofknowledge.com/full_record.do?product=WOS&search_mode=Analyze&qid=12&SID=V14H8DwmONKlBOFJt2r&excludeEventConfig=ExcludeIfFromFullRecPage&page=13&doc=144
166	Ooi & Ng	2009	JOURNAL OF MECHANICS IN MEDICINE AND BIOLOGY	9	2	199	https://www.worldscientific.com/doi/abs/10.1142/S0219519409002936
191	Kustas & Anderson	2009	AGRICULTURAL AND FOREST METEOROLOGY	149	12	2071	https://naldc.nal.usda.gov/download/36842/PDF
229	Romero-Mendez et al	2010	MATHEMATICAL MEDICINE AND BIOLOGY-A JOURNAL OF THE IMA	27	1	21	https://academic.oup.com/imammb/article/27/1/21/731492
252	Munns et al	2010	JOURNAL OF EXPERIMENTAL BOTANY	61	13	3499	https://academic.oup.com/jxb/article/61/13/3499/536378
253	Berger et al	2010	JOURNAL OF EXPERIMENTAL BOTANY	61	13	3519	https://academic.oup.com/jxb/article/61/13/3519/536868
258	Gerken et al	2010	ANIMAL	4	9	1451	https://www.cambridge.org/core/journals/animal/article/relationships-between-integumental-characteristics-and-thermoregulation-in-south-american-camelids/421805A5DAE6E79872C53F07C07290C1
264	Lee et al	2010	COMPUTERS AND ELECTRONICS IN AGRICULTURE	74	1	2	https://naldc.nal.usda.gov/download/46603/PDF
317	McCafferty et al	2011	COMPARATIVE BIOCHEMISTRY AND PHYSIOLOGY A-MOLECULAR & INTEGRATIVE PHYSIOLOGY	158	3	337	https://ac.els-cdn.com/S109564331000499X/1-s2.0-S109564331000499X-main.pdf?_tid=533bc676-bd5b-11e7-8fe1-00000aab0f6b&acdnat=1509358739_ad04e4ff73452359b9836fa31ab9c0e9
333	Soroko & Jodkowska	2011	MEDYCYNA WETERYNARYJNA	67	6	397	https://www.cabdirect.org/cabdirect/FullTextPDF/2011/20113205678.pdf
369	Szentkuti et al	2011	PERIODICUM BIOLOGORUM	113	4	385	https://scholar.google.com/scholar_lookup?issn=0031-5362&issue=4&journal=PERIODICUM%20BIOLOGORUM&hl=en&pages=385-392&title=Infrared%20thermography%20and%20image%20analysis%20for%20biomedical%20use&author=A%20Szentkuti&publication_year=2011&volume=113
370	Grubisic et al	2011	PERIODICUM BIOLOGORUM	113	4	401	http://hrcak.srce.hr/index.php?show=clanak&id_clanak_jezik=114205
371	Skala et al	2011	PERIODICUM BIOLOGORUM	113	4	407	http://hrcak.srce.hr/index.php?show=clanak&id_clanak_jezik=114230
410	Costello et al	2012	JOURNAL OF THERMAL BIOLOGY	37	2	103	https://ac.els-cdn.com/S030645651100163X/1-s2.0-S030645651100163X-main.pdf?_tid=c40da57c-c085-11e7-98dd-00000aacb360&acdnat=1509706821_1621066777d8275466b62fe10b90045c
417	Ring & Ammer	2012	PHYSIOLOGICAL MEASUREMENT	33	3	R33	http://iopscience.iop.org/article/10.1088/0967-3334/33/3/R33/meta
433	Mahlein et al	2012	EUROPEAN JOURNAL OF PLANT PATHOLOGY	133	1	197	https://link.springer.com/content/pdf/10.1007%2Fs10658-011-9878-z.pdf
442	Glenn	2012	HORTSCIENCE	47	6	697	http://hortsci.ashspublications.org/content/47/6/697.full.pdf+html
453	White et al	2012	FIELD CROPS RESEARCH	133		101	https://ac.els-cdn.com/S037842901200130X/1-s2.0-S037842901200130X-main.pdf?_tid=873da6c8-c559-11e7-b54b-00000aab0f01&acdnat=1510237577_fc8dc04a7e1c58bc2c73b2cd759c035a
459	Maes & Steppe	2012	JOURNAL OF EXPERIMENTAL BOTANY	63	13	4671	https://academic.oup.com/jxb/article/63/13/4671/486348
498	McCafferty	2013	IBIS	155	1	4	http://eprints.gla.ac.uk/73507/1/73507d.pdf
505	Fisher & webster	2013	ANIMAL PRODUCTION SCIENCE	53	9	924	https://scholar.google.com/scholar_lookup?author=A%20Fisher&atitle=Dairy%20cow%20welfare:%20the%20role%20of%20research%20and%20development%20in%20addressing%20increasing%20scrutiny&publication_year=2013&hl=en&journal=ANIMAL%20PRODUCTION%20SCIENCE&volume=53&issue=9&pages=924-930&issn=1836-0939&doi=10.1071/AN12276
507	Godyn et al	2013	ANNALS OF ANIMAL SCIENCE	13	3	423	https://www.degruyter.com/downloadpdf/j/aoas.2013.13.issue-3/aoas-2013-0027/aoas-2013-0027.pdf
533	Cilulko et al	2013	EUROPEAN JOURNAL OF WILDLIFE RESEARCH	59	1	17	https://link.springer.com/content/pdf/10.1007%2Fs10344-012-0688-1.pdf
537	Theurer et al	2013	VETERINARY CLINICS OF NORTH AMERICA-FOOD ANIMAL PRACTICE	29	1	59	http://krex.k-state.edu/dspace/bitstream/handle/2097/15452/whitevetclinnamfoodanim2013.pdf?sequence=1
547	Etehadtavakol & Ng	2013	JOURNAL OF MECHANICS IN MEDICINE AND BIOLOGY	13	2	1330001	https://scholar.google.com/scholar_lookup?author=M%20Etehadtavakol&atitle=BREAST%20THERMOGRAPHY%20AS%20A%20POTENTIAL%20NON-CONTACT%20METHOD%20IN%20THE%20EARLY%20DETECTION%20OF%20CANCER:%20A%20REVIEW&publication_year=2013&hl=en&journal=JOURNAL%20OF%20MECHANICS%20IN%20MEDICINE%20AND%20BIOLOGY&volume=13&issue=2&issn=0219-5194&doi=10.1142/S0219519413300019
550	Usha & Sighn	2013	SCIENTIA HORTICULTURAE		153	71	https://ac.els-cdn.com/S0304423813000241/1-s2.0-S0304423813000241-main.pdf?_tid=5027cbc6-cace-11e7-9a35-00000aacb35f&acdnat=1510837491_e15e30e3bf4e0c0a85144c7c37f75d0b
587	Costa et al	2013	JOURNAL OF EXPERIMENTAL BOTANY	64	13	3937	https://academic.oup.com/jxb/article/64/13/3937/435734
616	Kaetelic	2014	THERIOGENOLOGY	81	1	18	http://www.theriojournal.com/article/S0093-691X(13)00352-X/fulltext
635	Goletani et al	2014	EXCLI JOURNAL	13		241	https://www.ncbi.nlm.nih.gov/pmc/articles/PMC4464455/pdf/EXCLI-13-241.pdf
663	Myers et al	2014	PROCEEDINGS OF THE ASME SUMMER BIOENGINEERING CONFERENCE - 2013, PT B			V01BT53A003	https://scholar.google.co.uk/scholar?hl=en&as_sdt=0%2C5&q=TRANSLATIONAL+RESEARCH+IN+HIGH-INTENSITY+THERAPEUTIC+ULTRASOUND%3A+NOVEL+TECHNIQUES+FOR+PRE-CLINICAL+TESTING&btnG=
686	Redaelli et al	2014	JOURNAL OF EQUINE VETERINARY SCIENCE	34	3	345	https://ac.els-cdn.com/S0737080613004644/1-s2.0-S0737080613004644-main.pdf?_tid=2748ff0a-cf91-11e7-8bbb-00000aacb360&acdnat=1511360979_90043f9a2347c02ca85c79ecebc16653
688	Wisniewski et al	2014	ENVIRONMENTAL AND EXPERIMENTAL BOTANY	99		133	https://ac.els-cdn.com/S0098847213002037/1-s2.0-S0098847213002037-main.pdf?_tid=1ab00314-cf92-11e7-9775-00000aab0f6c&acdnat=1511361388_d845f6c0af8ac5acd8f5e6cc8a161c42
701	Opara & Pathare	2014	POSTHARVEST BIOLOGY AND TECHNOLOGY	91		9	https://ac.els-cdn.com/S0925521413003608/1-s2.0-S0925521413003608-main.pdf?_tid=67e6239a-cf9a-11e7-a99e-00000aab0f26&acdnat=1511364953_69340b9be7cc5ac70f0f056ac322246d
717	Allen & Howell	2014	PHYSIOLOGICAL MEASUREMENT	35	7	R91	https://scholar.google.com/scholar_lookup?author=J%20Allen&atitle=Microvascular%20imaging:%20techniques%20and%20opportunities%20for%20clinical%20physiological%20measurements&publication_year=2014&hl=en&journal=PHYSIOLOGICAL%20MEASUREMENT&volume=35&issue=7&pages=R91-R141&issn=0967-3334&doi=10.1088/0967-3334/35/7/R91&pmid=24910968
736	Ioannou et al	2014	PSYCHOPHYSIOLOGY	51	10	951	http://onlinelibrary.wiley.com/doi/10.1111/psyp.12243/epdf
751	Lathlean et al	2014	MARINE ECOLOGY PROGRESS SERIES	514		263	http://www.int-res.com/articles/meps2014/514/m514p263.pdf
758	Neuner	2014	FRONTIERS IN PLANT SCIENCE	5		654	https://www.ncbi.nlm.nih.gov/pmc/articles/PMC4249714/pdf/fpls-05-00654.pdf
807	Webster et al	2015	NEW ZEALAND VETERINARY JOURNAL	63	1	31	http://www.tandfonline.com/doi/pdf/10.1080/00480169.2014.958117?needAccess=true
814	Soerensen & Pedersen	2015	ACTA VETERINARIA SCANDINAVICA	57		5	https://actavetscand.biomedcentral.com/track/pdf/10.1186/s13028-015-0094-2?site=actavetscand.biomedcentral.com
824	Skala et al	2015	PERIODICUM BIOLOGORUM	117	1	167	http://hrcak.srce.hr/139537
830	Clay-Warner & Robinson	2015	EMOTION REVIEW	7	2	157	http://journals.sagepub.com/doi/pdf/10.1177/1754073914554783
838	Torquato et al	2015	JOURNAL OF ANIMAL BEHAVIOUR AND BIOMETEOROLOGY	3	2	51	https://periodicos.ufersa.edu.br/index.php/jabb/article/viewFile/4877/5648
841	Pierard et al	2015	JOURNAL OF VETERINARY BEHAVIOR-CLINICAL APPLICATIONS AND RESEARCH	10	3	255	http://www.sciencedirect.com/science/article/pii/S155878781500012X
848	Frederiks et al	2015	JOURNAL OF EXPERIMENTAL BOTANY	66	12	3487	https://academic.oup.com/jxb/article/66/12/3487/524420
866	Roelofs & Erp-van der Kooij	2015	ANIMAL REPRODUCTION	12	3	498	http://revistas.bvs-vet.org.br/animreprod/article/view/27468/28771
879	Bach et al	2015	PHYSIOLOGICAL MEASUREMENT	36	9	R27	http://iopscience.iop.org/article/10.1088/0967-3334/36/9/R27/meta
888	Linchant et al	2015	MAMMAL REVIEW	45	4	239	http://onlinelibrary.wiley.com/doi/10.1111/mam.12046/epdf
890	Wolfger et al	2015	VETERINARY CLINICS OF NORTH AMERICA-FOOD ANIMAL PRACTICE	31	3	351	http://www.vetfood.theclinics.com/article/S0749-0720(15)00041-9/pdf
906	Rekant et al	2016	AMERICAN JOURNAL OF VETERINARY RESEARCH	77	1	98	https://avmajournals.avma.org/doi/pdf/10.2460/ajvr.77.1.98
912	Zajkowski et al	2016	INTERNATIONAL JOURNAL OF WILDLAND FIRE	25	1	114	saved
941	Gulci & Akay	2016	JOURNAL OF THE FACULTY OF FORESTRY-ISTANBUL UNIVERSITY	66	2	698	http://dergipark.ulakbim.gov.tr/jffiu/article/view/5000130335/pdf_2094
942	Chernorizov et al	2016	PSYCHOLOGY IN RUSSIA-STATE OF THE ART	9	4	23	http://psychologyinrussia.com/volumes/pdf/Psychology_4_2016.pdf#page=23
949	Mahlein	2016	PLANT DISEASE	100	2	241	https://apsjournals.apsnet.org/doi/pdf/10.1094/PDIS-03-15-0340-FE
975	McManus et al	2016	COMPUTERS AND ELECTRONICS IN AGRICULTURE	123		10	https://ac.els-cdn.com/S0168169916000326/1-s2.0-S0168169916000326-main.pdf?_tid=97d4faa2-d514-11e7-8ce7-00000aacb360&acdnat=1511967199_4d018db6a036dfa785542881aca4ef87
989	Niedbalski	2016	MEDYCYNA WETERYNARYJNA-VETERINARY MEDICINE-SCIENCE AND PRACTICE	72	6	339	https://www.cabdirect.org/cabdirect/FullTextPDF/2016/20163222807.pdf
993	Knight-Jones et al	2016	TRANSBOUNDARY AND EMERGING DISEASES	63		42	http://onlinelibrary.wiley.com/doi/10.1111/tbed.12523/epdf
1000	Corte & Hernandez	2016	REVISTA BRASILEIRA DE MEDICINA DO ESPORTE	22	4	315	http://www.scielo.br/pdf/rbme/v22n4/1517-8692-rbme-22-04-00315.pdf
1036	Sathiyabarathi et al	2016	VETERINARY WORLD	9	10	1075	https://www.ncbi.nlm.nih.gov/pmc/articles/PMC5104715/pdf/VetWorld-9-1075.pdf
1047	Matthews et al	2016	VETERINARY JOURNAL	217		43	https://ac.els-cdn.com/S1090023316301538/1-s2.0-S1090023316301538-main.pdf?_tid=a00be2e2-d68d-11e7-8ddc-00000aacb35e&acdnat=1512129122_ba6c12837b9141e1bfc82e466952bb87
1048	Whitham & Miller	2016	ANIMAL WELFARE	25	4	395	https://scholar.google.com/scholar_lookup?author=J%20Whitham&atitle=Using%20technology%20to%20monitor%20and%20improve%20zoo%20animal%20welfare&publication_year=2016&hl=en&journal=ANIMAL%20WELFARE&volume=25&issue=4&pages=395-409&issn=0962-7286&doi=10.7120/09627286.25.4.395
1059	Tattersall	2016	COMPARATIVE BIOCHEMISTRY AND PHYSIOLOGY A-MOLECULAR & INTEGRATIVE PHYSIOLOGY	202		78	https://ac.els-cdn.com/S1095643316300435/1-s2.0-S1095643316300435-main.pdf?_tid=c93dc594-d698-11e7-9732-00000aacb362&acdnat=1512133916_6fb7b7594c4ce065afdcf699cd30bb88
1067	Chabot & Francis	2016	JOURNAL OF FIELD ORNITHOLOGY	87	4	343	http://onlinelibrary.wiley.com/doi/10.1111/jofo.12171/epdf
1071	Rahman & Cho	2016	SEED SCIENCE RESEARCH	26	4	285	https://www.cambridge.org/core/services/aop-cambridge-core/content/view/CA4DAA31C7642A0BC38AD944448BCCC9/S0960258516000234a.pdf/assessment_of_seed_quality_using_nondestructive_measurement_techniques_a_review.pdf
1087	Rihan et al	2017	JOURNAL OF PLANT INTERACTIONS	12	1	143	http://www.tandfonline.com/doi/pdf/10.1080/17429145.2017.1308568?needAccess=true
1130	Randle et al	2017	APPLIED ANIMAL BEHAVIOUR SCIENCE	190		57	https://ac.els-cdn.com/S0168159117300680/1-s2.0-S0168159117300680-main.pdf?_tid=bcdcd8c2-d9e4-11e7-adb1-00000aacb361&acdnat=1512496390_13128a7adc587cff64d9217afd7f0c85
1155	Khanal et al	2017	COMPUTERS AND ELECTRONICS IN AGRICULTURE	139		22	https://ac.els-cdn.com/S0168169916310225/1-s2.0-S0168169916310225-main.pdf?_tid=eafd0016-da8d-11e7-b7e0-00000aab0f02&acdnat=1512569053_ccffa44b13c56e94d06f0a10ee5cf43d
1164	Stoddard & Cramer	2017	VETERINARY CLINICS OF NORTH AMERICA-FOOD ANIMAL PRACTICE	33	2	365	http://www.vetfood.theclinics.com/article/S0749-0720(17)30020-8/pdf
1173	Meyer et al	2017	FRONTIERS IN PHYSIOLOGY	8		520	https://www.frontiersin.org/articles/10.3389/fphys.2017.00520/full
1179	Nasirahmadi et al	2017	LIVESTOCK SCIENCE	202		25	https://ac.els-cdn.com/S1871141317301543/1-s2.0-S1871141317301543-main.pdf?_tid=6a1bdf50-db4e-11e7-9c33-00000aacb362&acdnat=1512651729_ec3efe04b33ebffde2a4ab7bdc18c889
1203	Moreira et al	2017	JOURNAL OF THERMAL BIOLOGY	69		155	https://ac.els-cdn.com/S0306456517302073/1-s2.0-S0306456517302073-main.pdf?_tid=c7b369ca-db63-11e7-a54f-00000aab0f6c&acdnat=1512660906_1b4ece9a91e383de40addb9284fd5172
